# Supplementary material
Source: publisher figshare collection journal article supplement (https://tandf.figshare.com/ndownloader/files/21982782)
Supplement: Supplementary file 1 [file 21982782]

**APPENDIX 1: Minimally adjusted models**

**Section 1: Models using pack-years**

97,303 subjects, 721,127 subject-cycle records, 1,992 events (0.3%), 1,402,829.1 person-years of follow-up (records with unknown pack-years, unknown years of smoking, or unknown time since quitting deleted). **Each model includes stratification by age-month and cycle, also with region as a covariate.**

AIC: Akaike information criterion

Cov.: covariates

Est.: beta estimate

Std. Err.: standard error

X2: chi-squared test statistic

P(X2): chi-squared p-value

HR: hazard ratio

|  | **AIC w/o Cov.** | **AIC w/ Cov.** | **Covariates** | **Est.** | **Std. Err.** | **Χ2** | **P(Χ2)** | **HR** |
| --- | --- | --- | --- | --- | --- | --- | --- | --- |
| 1. | 21810.08 | 21796.11 | PM2.5 | 0.02450 | 0.08288 | 0.09 | 0.7676 | 1.025 |
|  |  |  |  |  |  |  |  |  |
| 2. | 21810.08 | 19734.78 | PM2.5 | 0.05487 | 0.08321 | 0.43 | 0.5092 | 1.056 |
|  |  |  | Current v Never | 3.25246 | 0.08446 | 1485.06 | <0.0001 | 25.910 |
|  |  |  | Former v Never | 1.86360 | 0.08077 | 532.29 | <0.0001 | 6.447 |
|  |  |  |  |  |  |  |  |  |
| 3. | 21810.08 | 18721.24 | PM2.5 | 0.07189 | 0.08421 | 0.73 | 0.3926 | 1.075 |
|  |  |  | Current v Never | 1.40518 | 0.10476 | 179.92 | <0.0001 | 4.076 |
|  |  |  | Former v Never | 0.96378 | 0.08774 | 120.65 | <0.0001 | 2.622 |
|  |  |  | Pack-Years | 0.03114 | 0.00092 | 1143.88 | <0.0001 | 1.032 |
|  |  |  |  |  |  |  |  |  |
| 4. | 21810.08 | 18550.32 | PM2.5 | 0.04568 | 0.08408 | 0.29 | 0.5869 | 1.047 |
|  |  |  | Current v Never | 0.18519 | 0.14328 | 1.67 | 0.1962 | 1.203 |
|  |  |  | Former v Never | 0.13206 | 0.11344 | 1.35 | 0.2444 | 1.142 |
|  |  |  | Pack-Years | 0.02220 | 0.00115 | 375.77 | <0.0001 | 1.022 |
|  |  |  | Years Smoked | 0.03593 | 0.00277 | 168.11 | <0.0001 | 1.037 |
|  |  |  |  |  |  |  |  |  |
| 5. | 21810.08 | 18545.49 | PM2.5 | 0.04449 | 0.08404 | 0.28 | 0.5966 | 1.045 |
|  |  |  | Current v Never | 0.72128 | 0.24607 | 8.59 | 0.0034 | 2.057 |
|  |  |  | Former v Never | 0.70898 | 0.24416 | 8.43 | 0.0037 | 2.032 |
|  |  |  | Pack-Years | 0.02241 | 0.00115 | 380.39 | <0.0001 | 1.023 |
|  |  |  | Years Smoked | 0.02507 | 0.00490 | 26.13 | <0.0001 | 1.025 |
|  |  |  | Months Quit | -0.00111 | 0.00042 | 7.02 | 0.0081 | 0.999 |
|  |  |  |  |  |  |  |  |  |
| 6. | 21810.08 | 18549.88 | PM2.5 | 0.04321 | 0.08408 | 0.26 | 0.6073 | 1.044 |
|  |  |  | Pack-Years | 0.02213 | 0.00114 | 377.31 | <0.0001 | 1.022 |
|  |  |  | Years Smoked | 0.03823 | 0.00208 | 337.29 | <0.0001 | 1.039 |
|  |  |  | Months Quit | -0.00006 | 0.00018 | 0.10 | 0.7472 | 1.000 |
|  |  |  |  |  |  |  |  |  |
| 7A. | 21810.08 | 18509.50 | PM2.5 | 0.04860 | 0.08401 | 0.33 | 0.5629 | 1.050 |
|  |  |  | Pack-Years | 0.07583 | 0.00832 | 83.08 | <0.0001 | 1.079 |
|  |  |  | Years Smoked | 0.03852 | 0.00207 | 346.63 | <0.0001 | 1.039 |
|  |  |  | Months Quit | -0.00005 | 0.00018 | 0.07 | 0.7919 | 1.000 |
|  |  |  | Pack-Yr-x-Age (Yrs) | -0.00075 | 0.00011 | 41.98 | <0.0001 | 0.999 |
|  |  |  |  |  |  |  |  |  |
| 7B. | 21810.08 | 18511.49 | PM2.5 | 0.04863 | 0.08402 | 0.33 | 0.5627 | 1.050 |
|  |  |  | Pack-Years | 0.08019 | 0.06737 | 1.42 | 0.2340 | 1.083 |
|  |  |  | Years Smoked | 0.03851 | 0.00208 | 344.23 | <0.0001 | 1.039 |
|  |  |  | Months Quit | -0.00005 | 0.00018 | 0.07 | 0.7906 | 1.000 |
|  |  |  | Pack-Yr-x-Age (Yrs) | -0.00087 | 0.00191 | 0.21 | 0.6481 | 0.999 |
|  |  |  | Pack-Yr-x-Age Squared | 8.79 e-7 | 0.00001 | 0.01 | 0.9479 | 1.000 |
|  |  |  |  |  |  |  |  |  |
| 7C. | 21810.08 | 18512.86 | PM2.5 | 0.04935 | 0.08402 | 0.34 | 0.5570 | 1.051 |
|  |  |  | Pack-Years | -0.29710 | 0.47788 | 0.39 | 0.5341 | 0.743 |
|  |  |  | Years Smoked | 0.03848 | 0.00208 | 343.69 | <0.0001 | 1.039 |
|  |  |  | Months Quit | -0.00005 | 0.00018 | 0.07 | 0.7859 | 1.000 |
|  |  |  | Pack-Yr-x-Age (Yrs) | 0.01560 | 0.02073 | 0.56 | 0.4519 | 1.016 |
|  |  |  | Pack-Yr-x-Age Squared | -0.00024 | 0.00030 | 0.63 | 0.4272 | 1.000 |
|  |  |  | Pack-Yr-x-Age Cubed | 1.13e-6 | 1.42e-6 | 0.64 | 0.4249 | 1.000 |
|  |  |  |  |  |  |  |  |  |
| 8. | 21810.08 | 18878.51 | PM2.5 | 0.07681 | 0.08450 | 0.82 | 0.3633 | 1.080 |
|  |  |  | Pack-Years | -0.28666 | 0.42977 | 0.44 | 0.5048 | 0.751 |
|  |  |  | Pack-Yr-x-Age (Yrs) | 0.01678 | 0.01862 | 0.81 | 0.3674 | 1.017 |
|  |  |  | Pack-Yr-x-Age Squared | -0.00027 | 0.00027 | 1.00 | 0.3163 | 1.000 |
|  |  |  | Pack-Yr-x-Age Cubed | 1.35e-6 | 1.27e-6 | 1.13 | 0.2867 | 1.000 |

Based on Models 7C and 8, HRs per 10 pack-years were evaluated at different ages. Effect modification by age is shown below in Figure S1.1.


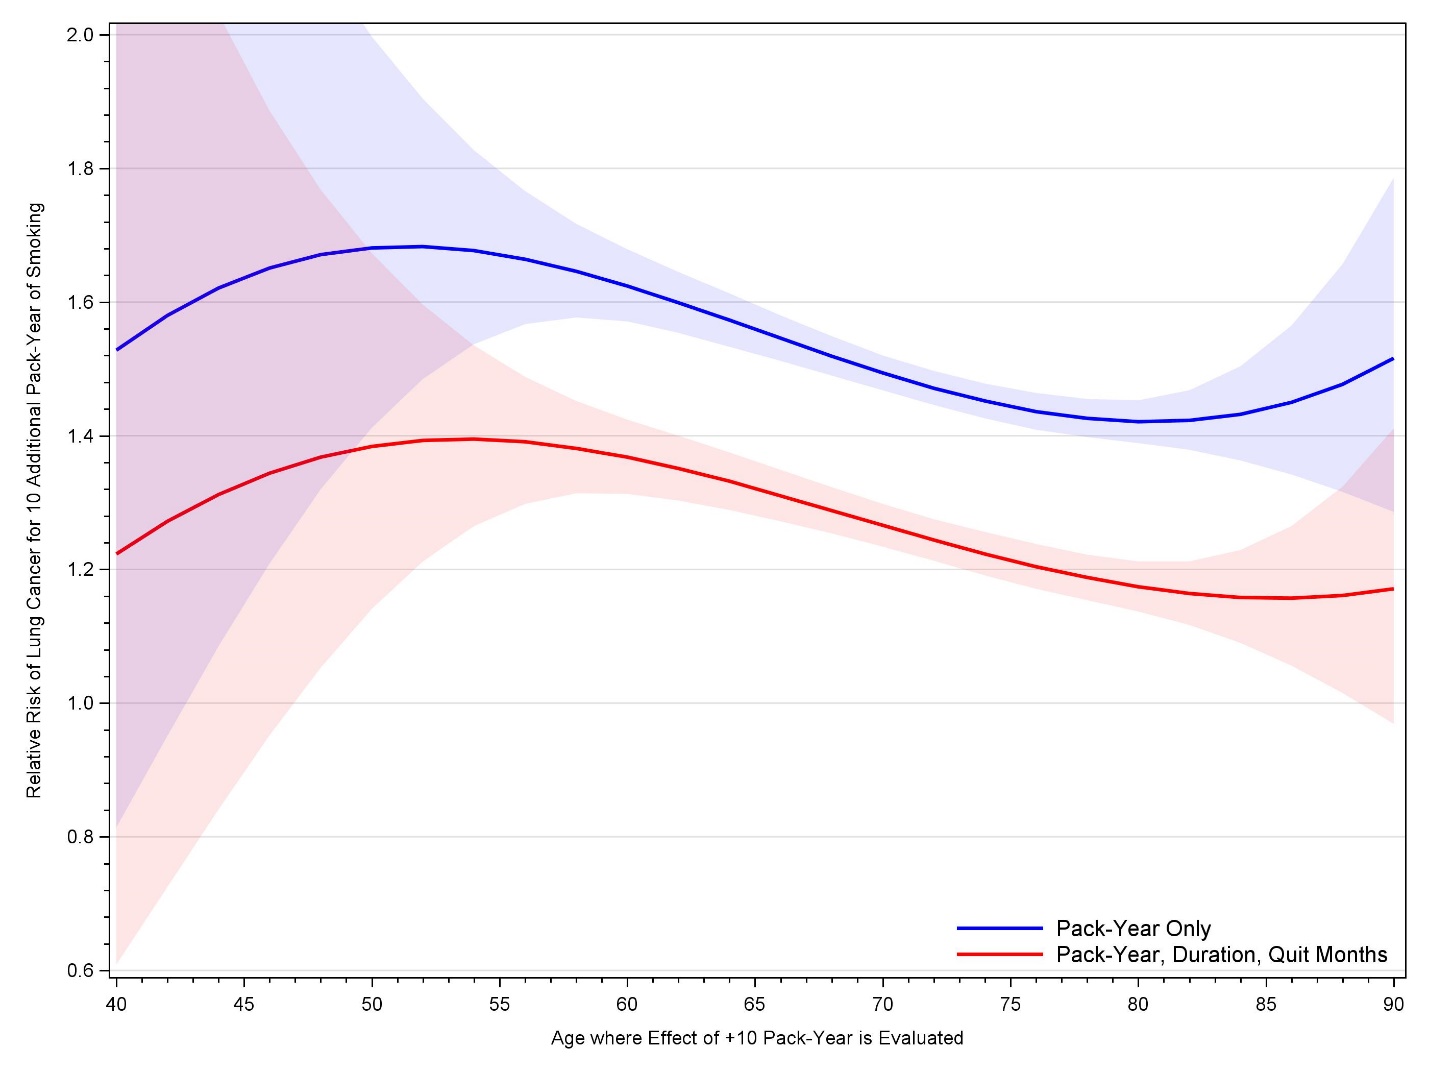


**Never Smokers**

44,245 subjects, 337,374 subject-cycle records, 179 events (0.1%), 659,099.5 person-years of follow-up (records with unknown pack-years, unknown years of smoking, or unknown time since quitting deleted). **Each model includes stratification by age-month and cycle, also with region as a covariate.**

|  | **AIC w/o Cov.** | **AIC w/ Cov.** | **Covariates** | **Est.** | **Std. Err.** | **Χ2** | **P(Χ2)** | **HR** |
| --- | --- | --- | --- | --- | --- | --- | --- | --- |
| 1. | 1667.02 | 1667.72 | PM2.5 | 0.21280 | 0.25937 | 0.67 | 0.4120 | 1.237 |
|  |  |  |  |  |  |  |  |  |

**Never or Former Smokers (Quit for ≥ 10 Years)**

83,819 subjects, 596,454 subject-cycle records, 833 events (0.1%), 1,161,499.3 person-years of follow-up (records with unknown pack-years, unknown years of smoking, or unknown time since quitting deleted).

**Each model includes stratification by age-month and cycle, also with region as a covariate.**

|  | **AIC w/o Cov.** | **AIC w/ Cov.** | **Covariates** | **Est.** | **Std. Err.** | **Χ2** | **P(Χ2)** | **HR** |
| --- | --- | --- | --- | --- | --- | --- | --- | --- |
| 1. | 8778.12 | 8778.17 | PM2.5 | 0.13747 | 0.12787 | 1.15 | 0.2823 | 1.147 |
|  |  |  |  |  |  |  |  |  |
| 2. | 8778.12 | 8380.38 | PM2.5 | 0.23804 | 0.12841 | 3.43 | 0.0638 | 1.269 |
|  |  |  | Former v Never | 1.52086 | 0.08478 | 321.78 | <0.0001 | 4.576 |
|  |  |  |  |  |  |  |  |  |
| 3. | 8778.12 | 7985.74 | PM2.5 | 0.27423 | 0.12979 | 4.46 | 0.0346 | 1.316 |
|  |  |  | Former v Never | 0.61646 | 0.10082 | 37.39 | <0.0001 | 1.852 |
|  |  |  | Pack-Years | 0.03611 | 0.00166 | 474.23 | <0.0001 | 1.037 |
|  |  |  |  |  |  |  |  |  |
| 4. | 8778.12 | 7943.16 | PM2.5 | 0.25853 | 0.12971 | 3.97 | 0.0462 | 1.295 |
|  |  |  | Former v Never | 0.09148 | 0.13298 | 0.47 | 0.4915 | 1.096 |
|  |  |  | Pack-Years | 0.02629 | 0.00222 | 139.91 | <0.0001 | 1.027 |
|  |  |  | Years Smoked | 0.03046 | 0.00455 | 44.89 | <0.0001 | 1.031 |
|  |  |  |  |  |  |  |  |  |
| 5A. | 8778.12 | 7941.19 | PM2.5 | 0.25714 | 0.12966 | 3.93 | 0.0474 | 1.293 |
|  |  |  | Former v Never | 0.79522 | 0.37027 | 4.61 | 0.0317 | 2.215 |
|  |  |  | Pack-Years | 0.02650 | 0.00223 | 141.35 | <0.0001 | 1.027 |
|  |  |  | Years Smoked | 0.01791 | 0.00763 | 5.50 | 0.0190 | 1.018 |
|  |  |  | Months Quit | -0.00127 | 0.00063 | 4.09 | 0.0432 | 0.999 |
|  |  |  |  |  |  |  |  |  |
| 5B. | 8778.12 | 7938.30 | PM2.5 | 0.25975 | 0.12962 | 4.01 | 0.0451 | 1.297 |
|  |  |  | Former v Never | 0.51470 | 0.40055 | 1.65 | 0.1988 | 1.673 |
|  |  |  | Pack-Years | -0.61864 | 1.15181 | 0.29 | 0.5912 | 0.539 |
|  |  |  | Years Smoked | 0.02296 | 0.00807 | 8.10 | 0.0044 | 1.023 |
|  |  |  | Months Quit | -0.00083 | 0.00066 | 1.55 | 0.2117 | 0.999 |
|  |  |  | Pack-Yr-x-Age (Yrs) | 0.02743 | 0.04867 | 0.32 | 0.5731 | 1.028 |
|  |  |  | Pack-Yr-x-Age Squared | -0.00037 | 0.00068 | 0.30 | 0.5824 | 1.000 |
|  |  |  | Pack-Yr-x-Age Cubed | 1.65e-6 | 3.17e-6 | 0.27 | 0.6018 | 1.000 |
|  |  |  |  |  |  |  |  |  |
| 6. | 8778.12 | 7943.62 | PM2.5 | 0.25568 | 0.12972 | 3.88 | 0.0487 | 1.291 |
|  |  |  | Pack-Years | 0.02617 | 0.00222 | 139.21 | <0.0001 | 1.027 |
|  |  |  | Years Smoked | 0.03250 | 0.00352 | 85.20 | <0.0001 | 1.033 |
|  |  |  | Months Quit | -0.00001 | 0.00022 | 0.01 | 0.9618 | 1.000 |
|  |  |  |  |  |  |  |  |  |
| 7A. | 8778.12 | 7934.39 | PM2.5 | 0.25896 | 0.12963 | 3.99 | 0.0457 | 1.296 |
|  |  |  | Pack-Years | 0.08585 | 0.01770 | 23.52 | <0.0001 | 1.090 |
|  |  |  | Years Smoked | 0.03220 | 0.00351 | 84.09 | <0.0001 | 1.033 |
|  |  |  | Months Quit | -0.00003 | 0.00022 | 0.02 | 0.8821 | 1.000 |
|  |  |  | Pack-Yr-x-Age (Yrs) | -0.00080 | 0.00024 | 11.42 | 0.0007 | 0.999 |
|  |  |  |  |  |  |  |  |  |
| 7B. | 8778.12 | 7936.07 | PM2.5 | 0.25871 | 0.12962 | 3.98 | 0.0459 | 1.295 |
|  |  |  | Pack-Years | -0.00066 | 0.15634 | 0.01 | 0.9966 | 0.999 |
|  |  |  | Years Smoked | 0.03232 | 0.00352 | 84.41 | <0.0001 | 1.033 |
|  |  |  | Months Quit | -0.00003 | 0.00022 | 0.01 | 0.8997 | 1.000 |
|  |  |  | Pack-Yr-x-Age (Yrs) | 0.00160 | 0.00430 | 0.14 | 0.7109 | 1.002 |
|  |  |  | Pack-Yr-x-Age Squared | -0.00002 | 0.00003 | 0.31 | 0.5773 | 1.000 |
|  |  |  |  |  |  |  |  |  |
| 7C. | 8778.12 | 7937.90 | PM2.5 | 0.25916 | 0.12964 | 4.00 | 0.0456 | 1.296 |
|  |  |  | Pack-Years | -0.46144 | 1.13662 | 0.16 | 0.6848 | 0.630 |
|  |  |  | Years Smoked | 0.03229 | 0.00352 | 84.25 | <0.0001 | 1.033 |
|  |  |  | Months Quit | -0.00003 | 0.00022 | 0.01 | 0.9021 | 1.000 |
|  |  |  | Pack-Yr-x-Age (Yrs) | 0.02123 | 0.04811 | 0.19 | 0.6591 | 1.022 |
|  |  |  | Pack-Yr-x-Age Squared | -0.00029 | 0.00067 | 0.19 | 0.6643 | 1.000 |
|  |  |  | Pack-Yr-x-Age Cubed | 1.29e-6 | 3.14e-6 | 0.17 | 0.6815 | 1.000 |
|  |  |  |  |  |  |  |  |  |
| 8. | 8778.12 | 8015.37 | PM2.5 | 0.25804 | 0.12990 | 3.95 | 0.0470 | 1.294 |
|  |  |  | Pack-Years | -0.47213 | 1.06302 | 0.20 | 0.6569 | 0.624 |
|  |  |  | Pack-Yr-x-Age (Yrs) | 0.02359 | 0.04492 | 0.27 | 0.5995 | 1.024 |
|  |  |  | Pack-Yr-x-Age^2 | -0.00034 | 0.00063 | 0.30 | 0.5857 | 1.000 |
|  |  |  | Pack-Yr-x-Age Cubed | 1.60e-6 | 2.93e-6 | 0.30 | 0.5848 | 1.000 |

Based on Models 7C and 8, HRs per 10 pack-years were evaluated at different ages. Effect modification by age is shown below in Figure S1.2.


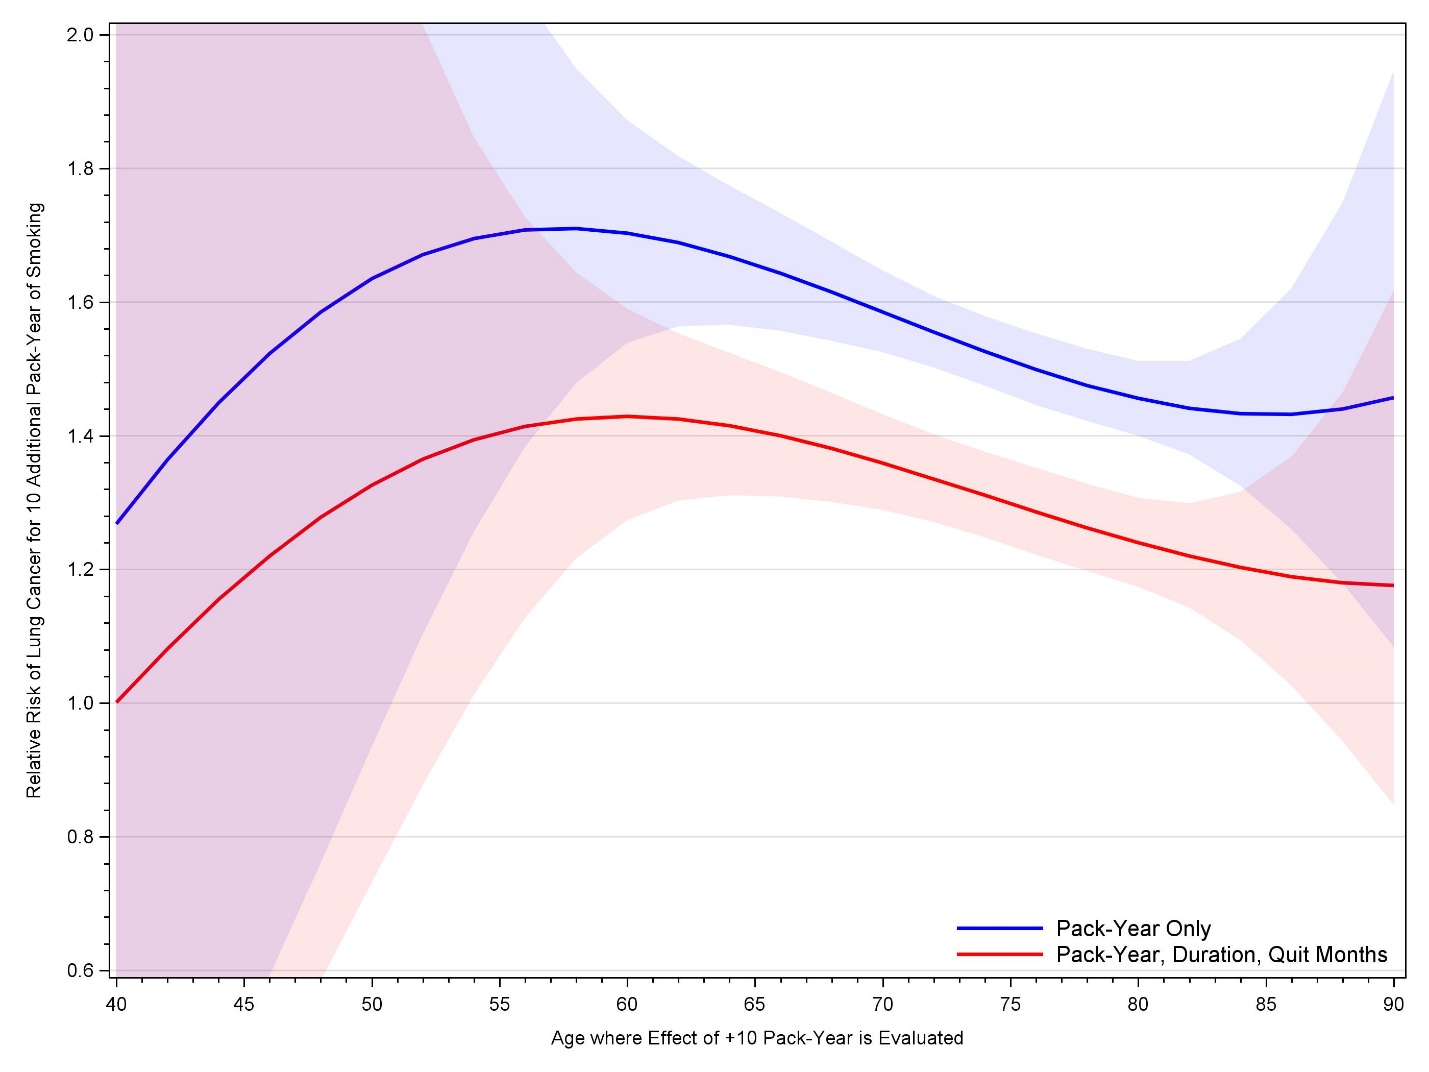


**Current or Former Smokers (Quit for < 10 Years)**

25,767 subjects, 124,673 subject-cycle records, 1,159 events (0.9%), 241,329.8 person-years of follow-up (records with unknown pack-years, unknown years of smoking, or unknown time since quitting deleted). **Each model includes stratification by age-month and cycle, also with region as a covariate.**

|  | **AIC w/o Cov.** | **AIC w/ Cov.** | **Covariates** | **Est.** | **Std. Err.** | **Χ2** | **P(Χ2)** | **HR** |
| --- | --- | --- | --- | --- | --- | --- | --- | --- |
| 1. | 8454.28 | 8449.35 | PM2.5 | -0.11339 | 0.11023 | 1.06 | 0.3036 | 0.893 |
|  |  |  |  |  |  |  |  |  |
| 2. | 8454.28 | 8396.00 | PM2.5 | -0.11709 | 0.11012 | 1.13 | 0.2876 | 0.890 |
|  |  |  | Current v Former | 0.45308 | 0.06170 | 53.92 | <0.0001 | 1.573 |
|  |  |  |  |  |  |  |  |  |
| 3. | 8454.28 | 8051.20 | PM2.5 | -0.08350 | 0.11193 | 0.56 | 0.4557 | 0.920 |
|  |  |  | Current v Former | 0.18820 | 0.06369 | 8.73 | 0.0031 | 1.207 |
|  |  |  | Pack-Years | 0.02381 | 0.00126 | 359.78 | <0.0001 | 1.024 |
|  |  |  |  |  |  |  |  |  |
| 4. | 8454.28 | 8024.52 | PM2.5 | -0.08565 | 0.11186 | 0.59 | 0.4439 | 0.918 |
|  |  |  | Current v Former | 0.03266 | 0.07032 | 0.21 | 0.6423 | 1.033 |
|  |  |  | Pack-Years | 0.02086 | 0.00137 | 230.61 | <0.0001 | 1.021 |
|  |  |  | Years Smoked | 0.03318 | 0.00652 | 25.84 | <0.0001 | 1.034 |
|  |  |  |  |  |  |  |  |  |
| 5A. | 8454.28 | 8025.98 | PM2.5 | -0.08578 | 0.11188 | 0.59 | 0.4432 | 0.918 |
|  |  |  | Current v Former | 0.08729 | 0.10315 | 0.72 | 0.3974 | 1.091 |
|  |  |  | Pack-Years | 0.02084 | 0.00137 | 229.82 | <0.0001 | 1.021 |
|  |  |  | Years Smoked | 0.03481 | 0.00695 | 25.09 | <0.0001 | 1.035 |
|  |  |  | Months Quit | 0.00111 | 0.00151 | 0.54 | 0.4630 | 1.001 |
|  |  |  |  |  |  |  |  |  |
| 5B. | 8454.28 | 8016.76 | PM2.5 | -0.07991 | 0.11170 | 0.51 | 0.4744 | 0.923 |
|  |  |  | Current v Former | 0.08695 | 0.10306 | 0.71 | 0.3988 | 1.091 |
|  |  |  | Pack-Years | -0.32337 | 0.88489 | 0.13 | 0.7148 | 0.724 |
|  |  |  | Years Smoked | 0.03338 | 0.00691 | 23.34 | <0.0001 | 1.034 |
|  |  |  | Months Quit | 0.00111 | 0.00150 | 0.54 | 0.4614 | 1.001 |
|  |  |  | Pack-Yr-x-Age (Yrs) | 0.01866 | 0.03869 | 0.23 | 0.6269 | 1.019 |
|  |  |  | Pack-Yr-x-Age Squared | -0.00031 | 0.00056 | 0.30 | 0.5803 | 1.000 |
|  |  |  | Pack-Yr-x-Age Cubed | 1.62e-6 | 2.69e-6 | 0.36 | 0.5468 | 1.000 |
|  |  |  |  |  |  |  |  |  |
| 6. | 8454.28 | 8024.71 | PM2.5 | -0.08506 | 0.11188 | 0.58 | 0.4471 | 0.918 |
|  |  |  | Pack-Years | 0.02088 | 0.00137 | 231.16 | <0.0001 | 1.021 |
|  |  |  | Years Smoked | 0.03508 | 0.00694 | 25.53 | <0.0001 | 1.021 |
|  |  |  | Months Quit | 0.00018 | 0.00104 | 0.03 | 0.8647 | 1.000 |
|  |  |  |  |  |  |  |  |  |
| 7A. | 8454.28 | 8013.19 | PM2.5 | -0.07928 | 0.11171 | 0.50 | 0.4779 | 0.924 |
|  |  |  | Pack-Years | 0.07210 | 0.01397 | 26.63 | <0.0001 | 1.075 |
|  |  |  | Years Smoked | 0.03403 | 0.00689 | 24.40 | <0.0001 | 1.035 |
|  |  |  | Months Quit | 0.00021 | 0.00103 | 0.04 | 0.8357 | 1.000 |
|  |  |  | Pack-Yr-x-Age (Yrs) | -0.00071 | 0.00020 | 13.54 | 0.0002 | 0.999 |
|  |  |  |  |  |  |  |  |  |
| 7B. | 8454.28 | 8013.83 | PM2.5 | -0.07930 | 0.11171 | 0.50 | 0.4777 | 0.924 |
|  |  |  | Pack-Years | 0.20586 | 0.11525 | 3.19 | 0.0741 | 1.229 |
|  |  |  | Years Smoked | 0.03368 | 0.00690 | 23.82 | <0.0001 | 1.034 |
|  |  |  | Months Quit | 0.00019 | 0.00103 | 0.03 | 0.8531 | 1.000 |
|  |  |  | Pack-Yr-x-Age (Yrs) | -0.00458 | 0.00331 | 1.92 | 0.1660 | 0.995 |
|  |  |  | Pack-Yr-x-Age Squared | 0.00003 | 0.00002 | 1.37 | 0.2424 | 1.000 |
|  |  |  |  |  |  |  |  |  |
| 7C. | 8454.28 | 8015.48 | PM2.5 | -0.07936 | 0.11170 | 0.50 | 0.4774 | 0.924 |
|  |  |  | Pack-Years | -0.31219 | 0.88475 | 0.12 | 0.7242 | 0.731 |
|  |  |  | Years Smoked | 0.03365 | 0.00690 | 23.75 | <0.0001 | 1.034 |
|  |  |  | Months Quit | 0.00018 | 0.00103 | 0.03 | 0.8599 | 1.000 |
|  |  |  | Pack-Yr-x-Age (Yrs) | 0.01818 | 0.03869 | 0.22 | 0.6384 | 1.018 |
|  |  |  | Pack-Yr-x-Age Squared | -0.00030 | 0.00056 | 0.29 | 0.5887 | 1.000 |
|  |  |  | Pack-Yr-x-Age Cubed | 1.59e-6 | 2.69e-6 | 0.35 | 0.5549 | 1.000 |
|  |  |  |  |  |  |  |  |  |
| 8. | 8454.28 | 8045.81 | PM2.5 | -0.07441 | 0.11183 | 0.44 | 0.5058 | 0.928 |
|  |  |  | Pack-Years | -0.30311 | 0.86611 | 0.12 | 0.7264 | 0.739 |
|  |  |  | Pack-Yr-x-Age (Yrs) | 0.01844 | 0.03786 | 0.24 | 0.6263 | 1.019 |
|  |  |  | Pack-Yr-x-Age Squared | -0.00031 | 0.00055 | 0.33 | 0.5678 | 1.000 |
|  |  |  | Pack-Yr-x-Age Cubed | 1.67e-6 | 2.63e-6 | 0.40 | 0.5268 | 1.000 |

Based on Models 7C and 8, HRs per 10 pack-years were evaluated at different ages. Effect modification by age is shown below in Figure S1.3.


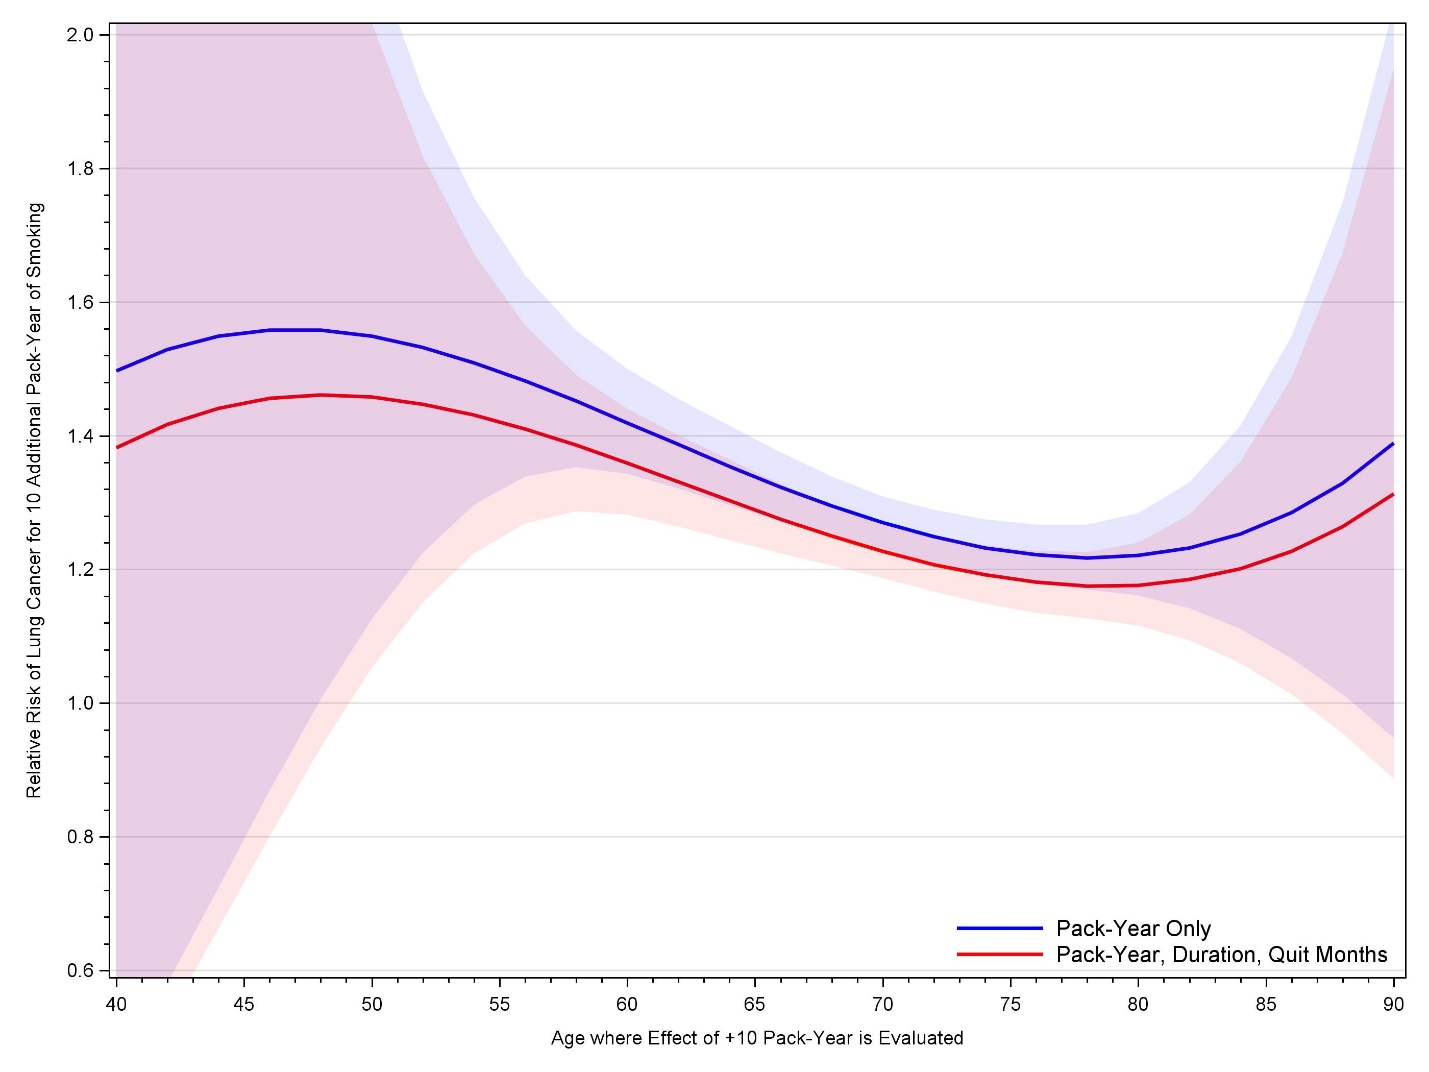


**Former Smokers Only (Quit for ≥ 10 Years)**

39,575 subjects, 259,080 subject-cycle records, 654 events (0.3%), 502,399.8 person-years of follow-up (records with unknown pack-years, unknown years of smoking, or unknown time since quitting deleted). **Each model includes stratification by age-month and cycle, also with region as a covariate.**

|  | **AIC w/o Cov.** | **AIC w/ Cov.** | **Covariates** | **Est.** | **Std. Err.** | **Χ2** | **P(Χ2)** | **HR** |
| --- | --- | --- | --- | --- | --- | --- | --- | --- |
| 1. | 5845.55 | 5848.00 | PM2.5 | 0.27027 | 0.14831 | 3.32 | 0.0684 | 1.310 |
|  |  |  |  |  |  |  |  |  |
| 2. | 5845.55 | 5455.74 | PM2.5 | 0.31600 | 0.15076 | 4.39 | 0.0361 | 1.372 |
|  |  |  | Pack-Years | 0.03639 | 0.00169 | 463.50 | <0.0001 | 1.037 |
|  |  |  |  |  |  |  |  |  |
| 3. | 5845.55 | 5409.75 | PM2.5 | 0.29598 | 0.15063 | 3.86 | 0.0494 | 1.344 |
|  |  |  | Pack-Years | 0.02625 | 0.00224 | 137.18 | <0.0001 | 1.027 |
|  |  |  | Years Smoked | 0.03248 | 0.00469 | 47.86 | <0.0001 | 1.033 |
|  |  |  |  |  |  |  |  |  |
| 4. | 5845.55 | 5410.97 | PM2.5 | 0.29536 | 0.15060 | 3.85 | 0.0499 | 1.344 |
|  |  |  | Pack-Years | 0.02636 | 0.00225 | 137.76 | <0.0001 | 1.027 |
|  |  |  | Years Smoked | 0.02506 | 0.00947 | 7.00 | 0.0081 | 1.025 |
|  |  |  | Months Quit | -0.00069 | 0.00077 | 0.80 | 0.3700 | 0.999 |
|  |  |  |  |  |  |  |  |  |
| 5A. | 5845.55 | 5406.99 | PM2.5 | 0.29734 | 0.15050 | 3.90 | 0.0482 | 1.346 |
|  |  |  | Pack-Years | 0.08113 | 0.02233 | 13.20 | 0.0003 | 1.085 |
|  |  |  | Years Smoked | 0.02373 | 0.00942 | 6.34 | 0.0118 | 1.024 |
|  |  |  | Months Quit | -0.00076 | 0.00077 | 0.98 | 0.3225 | 0.999 |
|  |  |  | Pack-Yr-x-Age (Yrs) | -0.00073 | 0.00030 | 6.04 | 0.0139 | 0.999 |
|  |  |  |  |  |  |  |  |  |
| 5B. | 5845.55 | 5408.91 | PM2.5 | 0.29748 | 0.15050 | 3.91 | 0.0481 | 1.346 |
|  |  |  | Pack-Years | 0.13536 | 0.19843 | 0.46 | 0.4952 | 1.145 |
|  |  |  | Years Smoked | 0.02368 | 0.00943 | 6.31 | 0.0120 | 1.024 |
|  |  |  | Months Quit | -0.00075 | 0.00077 | 0.98 | 0.3232 | 0.999 |
|  |  |  | Pack-Yr-x-Age (Yrs) | -0.00223 | 0.00546 | 0.17 | 0.6826 | 0.998 |
|  |  |  | Pack-Yr-x-Age Squared | 0.00001 | 0.00004 | 0.072 | 0.7834 | 1.000 |
|  |  |  |  |  |  |  |  |  |
| 5C. | 5845.55 | 5410.70 | PM2.5 | 0.29849 | 0.15056 | 3.93 | 0.0475 | 1.348 |
|  |  |  | Pack-Years | -0.49706 | 1.40705 | 0.12 | 0.7239 | 0.608 |
|  |  |  | Years Smoked | 0.02362 | 0.00943 | 6.28 | 0.0122 | 1.024 |
|  |  |  | Months Quit | -0.00076 | 0.00077 | 0.98 | 0.3214 | 0.999 |
|  |  |  | Pack-Yr-x-Age (Yrs) | 0.02467 | 0.05948 | 0.17 | 0.6783 | 1.025 |
|  |  |  | Pack-Yr-x-Age Squared | -0.00037 | 0.00083 | 0.19 | 0.6587 | 1.000 |
|  |  |  | Pack-Yr-x-Age Cubed | 1.76e-6 | 3.88e-6 | 0.21 | 0.6493 | 1.000 |
|  |  |  |  |  |  |  |  |  |
| 6. | 5845.55 | 5453.66 | PM2.5 | 0.31966 | 0.15074 | 4.50 | 0.0340 | 1.377 |
|  |  |  | Pack-Years | -0.49905 | 1.36033 | 0.13 | 0.7137 | 0.607 |
|  |  |  | Pack-Yr-x-Age (Yrs) | 0.02615 | 0.05746 | 0.21 | 0.6491 | 1.026 |
|  |  |  | Pack-Yr-x-Age Squared | -0.00040 | 0.00080 | 0.25 | 0.6181 | 1.000 |
|  |  |  | Pack-Yr-x-Age Cubed | 1.97e-6 | 3.74e-6 | 0.28 | 0.5989 | 1.000 |

Based on Models 5C and 6, HRs per 10 pack-years were evaluated at different ages. Effect modification by age is shown below in Figure S1.4.


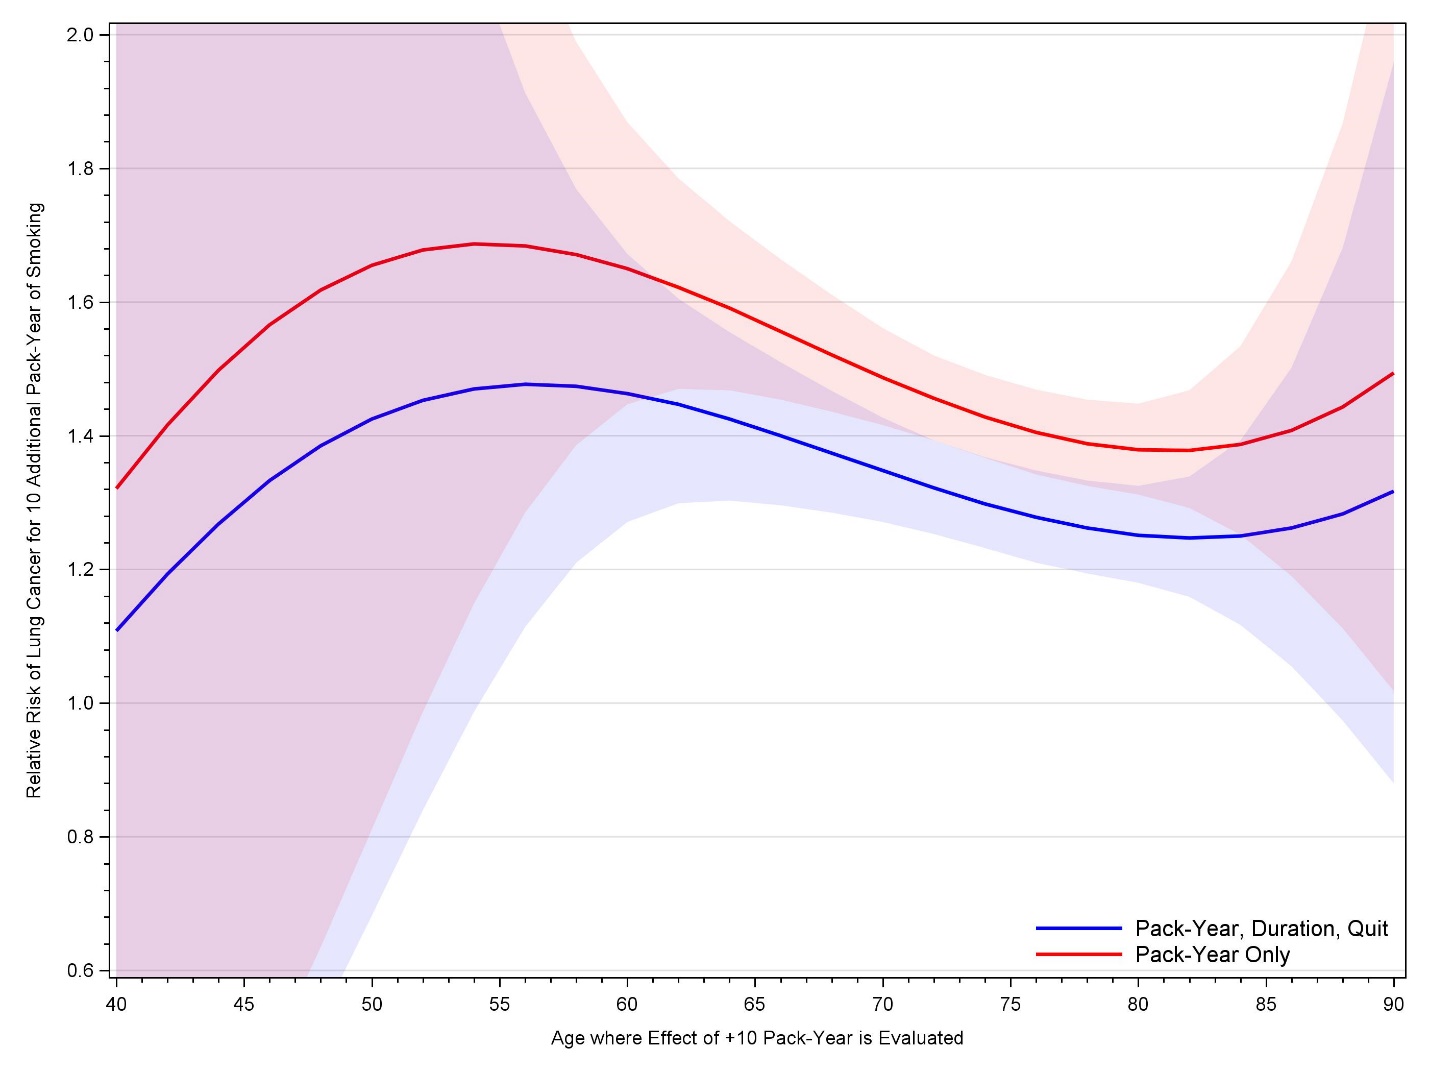


**Section 2: Models using average packs**

97,303 subjects, 721,127 subject-cycle records, 1,992 events (0.3%), 1,402,807.3 person-years of follow-up (records with unknown pack-years, unknown years of smoking, or unknown time since quitting deleted). **Each model includes stratification by age-month and cycle, also with region as a covariate.**

|  | **AIC w/o Cov.** | **AIC w/ Cov.** | **Covariates** | **Est.** | **Std. Err.** | **Χ2** | **P(Χ2)** | **HR** |
| --- | --- | --- | --- | --- | --- | --- | --- | --- |
| 1. | 21810.08 | 21796.11 | PM2.5 | 0.02450 | 0.08288 | 0.08 | 0.7676 | 1.025 |
|  |  |  |  |  |  |  |  |  |
| 2. | 21810.08 | 19734.78 | PM2.5 | 0.05487 | 0.08312 | 0.43 | 0.5092 | 1.056 |
|  |  |  | Current v Never | 3.25462 | 0.08446 | 1485.06 | <0.0001 | 25.910 |
|  |  |  | Former v Never | 1.86360 | 0.08077 | 532.29 | <0.0001 | 6.447 |
|  |  |  |  |  |  |  |  |  |
| 3. | 21810.08 | 18872.12 | PM2.5 | 0.01521 | 0.08348 | 0.03 | 0.8554 | 1.015 |
|  |  |  | Current v Never | -0.30144 | 0.15981 | 3.56 | 0.0593 | 0.740 |
|  |  |  | Former v Never | -0.38231 | 0.12934 | 8.74 | 0.0031 | 0.682 |
|  |  |  | Average Packs | 1.00686 | 0.13990 | 51.80 | <0.0001 | 2.737 |
|  |  |  | Years Smoked | 0.06871 | 0.00252 | 741.28 | <0.0001 | 1.071 |
|  |  |  |  |  |  |  |  |  |
| 4. | 21810.08 | 18870.31 | PM2.5 | 0.01447 | 0.08345 | 0.03 | 0.8624 | 1.015 |
|  |  |  | Current v Never | 0.08224 | 0.25023 | 0.11 | 0.7424 | 1.086 |
|  |  |  | Former v Never | 0.03318 | 0.24604 | 0.02 | 0.8927 | 1.034 |
|  |  |  | Average Packs | 1.03443 | 0.14024 | 54.41 | <0.0001 | 2.813 |
|  |  |  | Years Smoked | 0.06100 | 0.00461 | 174.95 | <0.0001 | 1.063 |
|  |  |  | Months Quit | -0.00083 | 0.00042 | 3.90 | 0.0484 | 0.999 |
|  |  |  |  |  |  |  |  |  |
| 5. | 21810.08 | 18866.94 | PM2.5 | 0.01485 | 0.08346 | 0.03 | 0.8588 | 1.015 |
|  |  |  | Average Packs | 1.06051 | 0.13423 | 62.42 | <0.0001 | 2.888 |
|  |  |  | Years Smoked | 0.06213 | 0.00153 | 1638.30 | <0.0001 | 1.064 |
|  |  |  | Months Quit | -0.00085 | 0.00020 | 17.25 | <0.0001 | 0.999 |
|  |  |  |  |  |  |  |  |  |
| 6A. | 21810.08 | 18868.59 | PM2.5 | 0.01497 | 0.08347 | 0.03 | 0.8576 | 1.015 |
|  |  |  | Average Packs | 0.45229 | 1.02969 | 0.19 | 0.6605 | 1.572 |
|  |  |  | Years Smoked | 0.06209 | 0.00154 | 1633.56 | <0.0001 | 1.064 |
|  |  |  | Months Quit | -0.00086 | 0.00020 | 17.56 | <0.0001 | 0.999 |
|  |  |  | Ave Pck-x-Age (Yrs) | 0.00897 | 0.01459 | 0.36 | 0.5487 | 1.009 |
|  |  |  |  |  |  |  |  |  |
| 6B. | 21810.08 | 18869.28 | PM2.5 | 0.01544 | 0.08346 | 0.03 | 0.8533 | 1.016 |
|  |  |  | Average Packs | 3.23904 | 2.63085 | 1.52 | 0.2183 | 25.509 |
|  |  |  | Years Smoked | 0.06207 | 0.00154 | 1632.16 | <0.0001 | 1.064 |
|  |  |  | Months Quit | -0.00086 | 0.00020 | 17.66 | <0.0001 | 0.999 |
|  |  |  | Ave Pck-x-Age (Yrs) | -0.07681 | 0.07632 | 1.01 | 0.3137 | 0.926 |
|  |  |  | Ave Pck-x-Age Squared | 0.00065 | 0.00057 | 1.32 | 0.2510 | 1.001 |
|  |  |  |  |  |  |  |  |  |
| 6C. | 21810.31 | 18870.50 | PM2.5 | 0.01582 | 0.08346 | 0.03 | 0.8496 | 1.016 |
|  |  |  | Average Packs | 1.60822 | 3.36717 | 0.23 | 0.6329 | 4.994 |
|  |  |  | Years Smoked | 0.06207 | 0.00154 | 1631.48 | <0.0001 | 1.064 |
|  |  |  | Months Quit | -0.00086 | 0.00020 | 17.67 | <0.0001 | 0.999 |
|  |  |  | Yrs Smk-x-Age (Yrs) | -0.10244 | 0.08199 | 1.56 | 0.2115 | 0.903 |
|  |  |  | Yrs Smk-x-Age Squared | 0.00246 | 0.00217 | 1.28 | 0.2579 | 1.002 |
|  |  |  | Yrs Smk-x-Age Cubed | -0.00002 | 0.00002 | 0.73 | 0.3931 | 1.000 |
|  |  |  |  |  |  |  |  |  |

**Never Smokers**

44,245 subjects, 337,374 subject-cycle records, 179 events (0.1%), 659,099.5 person-years of follow-up

(records with unknown pack-years, unknown years of smoking, or unknown time since quitting deleted). **Each model includes stratification by age-month and cycle, also with region as a covariate.**

|  | **AIC w/o Cov.** | **AIC w/ Cov.** | **Covariates** | **Est.** | **Std. Err.** | **Χ2** | **P(Χ2)** | **HR** |
| --- | --- | --- | --- | --- | --- | --- | --- | --- |
| 1. | 1667.02 | 1667.72 | PM2.5 | 0.21280 | 0.25937 | 0.67 | 0.4120 | 1.237 |
|  |  |  |  |  |  |  |  |  |

**Never or Former Smokers (Quit for ≥ 10 Years)**

83,819 subjects, 596,454 subject-cycle records, 833 events (0.1%), 1,161,499.3 person-years of follow-up (records with unknown pack-years, unknown years of smoking, or unknown time since quitting deleted). **Each model includes stratification by age-month and cycle, also with region as a covariate.**

|  | **AIC w/o Cov.** | **AIC w/ Cov.** | **Covariates** | **Est.** | **Std. Err.** | **Χ2** | **P(Χ2)** | **HR** |
| --- | --- | --- | --- | --- | --- | --- | --- | --- |
| 1. | 8778.12 | 8778.17 | PM2.5 | 0.13747 | 0.12787 | 1.16 | 0.2823 | 1.147 |
|  |  |  |  |  |  |  |  |  |
| 2. | 8778.12 | 8380.38 | PM2.5 | 0.23804 | 0.12841 | 3.43 | 0.0638 | 1.269 |
|  |  |  | Former v Never | 1.52086 | 0.08478 | 321.78 | <0.0001 | 4.576 |
|  |  |  |  |  |  |  |  |  |
| 3. | 8778.12 | 8067.05 | PM2.5 | 0.21769 | 0.12882 | 2.85 | 0.0911 | 1.243 |
|  |  |  | Former v Never | -0.25613 | 0.16193 | 2.50 | 0.1137 | 0.774 |
|  |  |  | Average Packs | 0.61527 | 0.19824 | 9.63 | 0.0019 | 1.850 |
|  |  |  | Years Smoked | 0.06493 | 0.00399 | 264.90 | <0.0001 | 1.067 |
|  |  |  |  |  |  |  |  |  |
| 4. | 8778.12 | 8067.56 | PM2.5 | 0.22239 | 0.12876 | 2.98 | 0.0841 | 1.249 |
|  |  |  | Average Packs | 0.42648 | 0.16989 | 6.30 | 0.0121 | 1.532 |
|  |  |  | Years Smoked | 0.05980 | 0.00231 | 667.66 | <0.0001 | 1.062 |
|  |  |  |  |  |  |  |  |  |
| 5. | 8778.12 | 8066.27 | PM2.5 | 0.21609 | 0.12879 | 2.81 | 0.0934 | 1.241 |
|  |  |  | Former v Never | 0.32174 | 0.37675 | 0.73 | 0.3931 | 1.380 |
|  |  |  | Average Packs | 0.62720 | 0.19851 | 9.98 | 0.0016 | 1.872 |
|  |  |  | Years Smoked | 0.05484 | 0.00713 | 59.21 | <0.0001 | 1.056 |
|  |  |  | Months Quit | -0.00106 | 0.00063 | 2.85 | 0.0913 | 0.999 |
|  |  |  |  |  |  |  |  |  |
| 6. | 8778.12 | 8064.99 | PM2.5 | 0.21578 | 0.12881 | 2.81 | 0.0939 | 1.241 |
|  |  |  | Average Packs | 0.66352 | 0.19153 | 12.00 | 0.0005 | 1.942 |
|  |  |  | Years Smoked | 0.06061 | 0.00231 | 689.63 | <0.0001 | 1.062 |
|  |  |  | Months Quit | -0.00057 | 0.00027 | 4.51 | 0.0337 | 0.999 |
|  |  |  |  |  |  |  |  |  |
| 7A. | 8778.12 | 8066.97 | PM2.5 | 0.21583 | 0.12882 | 2.81 | 0.0938 | 1.241 |
|  |  |  | Average Packs | 0.48911 | 1.36217 | 0.13 | 0.7195 | 1.631 |
|  |  |  | Years Smoked | 0.06061 | 0.00231 | 689.72 | <0.0001 | 1.062 |
|  |  |  | Months Quit | -0.00058 | 0.00027 | 4.50 | 0.0338 | 0.999 |
|  |  |  | Ave Pck-x-Age (Yrs) | 0.00255 | 0.01966 | 0.02 | 0.8969 | 1.003 |
|  |  |  |  |  |  |  |  |  |
| 7B. | 8778.12 | 8066.80 | PM2.5 | 0.21525 | 0.12883 | 2.79 | 0.0948 | 1.240 |
|  |  |  | Average Packs | 6.23565 | 4.06984 | 2.35 | 0.1255 | 510.631 |
|  |  |  | Years Smoked | 0.06057 | 0.00231 | 688.38 | <0.0001 | 1.062 |
|  |  |  | Months Quit | -0.00058 | 0.00027 | 4.55 | 0.0330 | 0.999 |
|  |  |  | Ave Pck-x-Age (Yrs) | -0.17255 | 0.11933 | 2.09 | 0.1482 | 0.842 |
|  |  |  | Ave Pck-x-Age Squared | 0.00131 | 0.00088 | 2.21 | 0.1373 | 1.001 |
|  |  |  |  |  |  |  |  |  |
| 7C. | 8778.12 | 8068.07 | PM2.5 | 0.21547 | 0.12882 | 2.80 | 0.0944 | 1.240 |
|  |  |  | Average Packs | 5.07786 | 4.53230 | 1.26 | 0.2626 | 160.430 |
|  |  |  | Years Smoked | 0.06055 | 0.00231 | 687.43 | <0.0001 | 1.062 |
|  |  |  | Months Quit | -0.00058 | 0.00027 | 4.62 | 0.0315 | 0.999 |
|  |  |  | Ave Pck-x-Age (Yrs) | -0.22833 | 0.13701 | 2.78 | 0.0956 | 0.796 |
|  |  |  | Ave Pck-x-Age Squared | 0.00370 | 0.00297 | 1.55 | 0.2133 | 1.004 |
|  |  |  | Ave Pck-x-Age Cubed | -0.00002 | 0.00002 | 0.69 | 0.4064 | 1.000 |
|  |  |  |  |  |  |  |  |  |

**Current or Former Smokers (Quit for < 10 Years)**

25,767 subjects, 124,673 subject-cycle records, 1,159 events (0.9%), 241,329.8 person-years of follow-up (records with unknown pack-years, unknown years of smoking, or unknown time since quitting deleted). **Each model includes stratification by age-month and cycle, also with region as a covariate.**

|  | **AIC w/o Cov.** | **AIC w/ Cov.** | **Covariates** | **Est.** | **Std. Err.** | **Χ2** | **P(Χ2)** | **HR** |
| --- | --- | --- | --- | --- | --- | --- | --- | --- |
| 1. | 8454.28 | 8449.35 | PM2.5 | -0.11339 | 0.11023 | 1.06 | 0.3036 | 0.893 |
|  |  |  |  |  |  |  |  |  |
| 2. | 8454.28 | 8396.00 | PM2.5 | -0.11709 | 0.11012 | 1.13 | 0.2876 | 0.890 |
|  |  |  | Current v Former | 0.45308 | 0.06170 | 53.92 | <0.0001 | 1.573 |
|  |  |  |  |  |  |  |  |  |
| 3. | 8454.28 | 8150.20 | PM2.5 | -0.10276 | 0.11075 | 0.86 | 0.3535 | 0.902 |
|  |  |  | Current v Former | -0.03960 | 0.07057 | 0.31 | 0.0031 | 1.207 |
|  |  |  | Average Packs | 3.62559 | 0.28181 | 165.52 | <0.0001 | 37.547 |
|  |  |  | Years Smoked | 0.08459 | 0.00652 | 168.14 | <0.0001 | 1.088 |
|  |  |  |  |  |  |  |  |  |
| 4. | 8454.28 | 8148.87 | PM2.5 | -0.10329 | 0.11073 | 0.87 | 0.3509 | 0.902 |
|  |  |  | Average Packs | 3.57753 | 0.26784 | 178.41 | <0.0001 | 35.785 |
|  |  |  | Years Smoked | 0.08284 | 0.00570 | 210.97 | <0.0001 | 1.086 |
|  |  |  |  |  |  |  |  |  |
| 5. | 8454.28 | 8148.65 | PM2.5 | -0.10260 | 0.11082 | 0.86 | 0.3545 | 0.902 |
|  |  |  | Current v Former | 0.10343 | 0.10279 | 1.01 | 0.3143 | 1.109 |
|  |  |  | Average Packs | 3.74120 | 0.29053 | 165.82 | <0.0001 | 42.149 |
|  |  |  | Years Smoked | 0.08960 | 0.00713 | 157.84 | <0.0001 | 1.094 |
|  |  |  | Months Quit | 0.00300 | 0.00152 | 3.91 | 0.0479 | 1.003 |
|  |  |  |  |  |  |  |  |  |
| 6. | 8454.28 | 8147.67 | PM2.5 | -0.10201 | 0.11081 | 0.85 | 0.3573 | 0.903 |
|  |  |  | Average Packs | 3.76147 | 0.28993 | 168.32 | <0.0001 | 43.012 |
|  |  |  | Years Smoked | 0.09005 | 0.00712 | 159.98 | <0.0001 | 1.094 |
|  |  |  | Months Quit | 0.00191 | 0.00106 | 3.22 | 0.0727 | 1.002 |
|  |  |  |  |  |  |  |  |  |
| 7A. | 8454.28 | 8149.51 | PM2.5 | -0.10295 | 0.11086 | 0.86 | 0.3531 | 0.902 |
|  |  |  | Average Packs | 2.72560 | 2.58222 | 1.11 | 0.2912 | 15.266 |
|  |  |  | Years Smoked | 0.09027 | 0.00715 | 159.60 | <0.0001 | 1.094 |
|  |  |  | Months Quit | 0.00193 | 0.00106 | 3.29 | 0.0696 | 1.002 |
|  |  |  | Ave Pck-x-Age (Yrs) | 0.01532 | 0.03738 | 0.16 | 0.6858 | 1.015 |
|  |  |  |  |  |  |  |  |  |
| 7B. | 8454.28 | 8150.92 | PM2.5 | -0.10266 | 0.11085 | 0.86 | 0.3544 | 0.902 |
|  |  |  | Average Packs | 4.82175 | 3.76076 | 1.64 | 0.1998 | 124.182 |
|  |  |  | Years Smoked | 0.09044 | 0.00716 | 159.75 | <0.0001 | 1.095 |
|  |  |  | Months Quit | 0.00196 | 0.00106 | 3.38 | 0.0658 | 1.002 |
|  |  |  | Ave Pck-x-Age (Yrs) | -0.05782 | 0.10256 | 0.32 | 0.5729 | 0.944 |
|  |  |  | Ave Pck-x-Age Squared | 0.00062 | 0.00080 | 0.59 | 0.4452 | 1.001 |
|  |  |  |  |  |  |  |  |  |
| 7C. | 8454.28 | 8150.92 | PM2.5 | -0.10112 | 0.11089 | 0.83 | 0.3618 | 0.904 |
|  |  |  | Average Packs | 15.37467 | 9.13814 | 2.83 | 0.0925 | >999.9 |
|  |  |  | Years Smoked | 0.09044 | 0.00714 | 160.62 | <0.0001 | 1.095 |
|  |  |  | Months Quit | 0.00193 | 0.00106 | 3.30 | 0.0691 | 1.002 |
|  |  |  | Ave Pck-x-Age (Yrs) | -0.04260 | 0.10328 | 0.17 | 0.6800 | 0.958 |
|  |  |  | Ave Pck-x-Age Squared | -0.00679 | 0.00592 | 1.31 | 0.2516 | 0.993 |
|  |  |  | Ave Pck-x-Age Cubed | 0.00007 | 0.00006 | 1.59 | 0.2062 | 1.000 |
|  |  |  |  |  |  |  |  |  |

**Former Smokers Only (Quit for ≥ 10 Years)**

39,575 subjects, 259,080 subject-cycle records, 654 events (0.3%), 502,399.8 person-years of follow-up (records with unknown pack-years, unknown years of smoking, or unknown time since quitting deleted). **Each model includes stratification by age-month and cycle, also with region as a covariate.**

|  | **AIC w/o Cov.** | **AIC w/ Cov.** | **Covariates** | **Est.** | **Std. Err.** | **Χ2** | **P(Χ2)** | **HR** |
| --- | --- | --- | --- | --- | --- | --- | --- | --- |
| 1. | 5845.55 | 5848.00 | PM2.5 | 0.27027 | 0.14831 | 3.32 | 0.0684 | 1.310 |
|  |  |  |  |  |  |  |  |  |
| 2. | 5845.55 | 5531.80 | PM2.5 | 0.24212 | 0.14918 | 2.63 | 0.1046 | 1.274 |
|  |  |  | Average Packs | 0.61231 | 0.20004 | 9.37 | 0.0022 | 1.845 |
|  |  |  | Years Smoked | 0.06718 | 0.00415 | 261.51 | <0.0001 | 1.069 |
|  |  |  |  |  |  |  |  |  |
| 3. | 5845.55 | 5533.57 | PM2.5 | 0.24158 | 0.14917 | 2.62 | 0.1053 | 1.273 |
|  |  |  | Average Packs | 0.61654 | 0.20009 | 9.49 | 0.0021 | 1.853 |
|  |  |  | Years Smoked | 0.06331 | 0.00903 | 49.12 | <0.0001 | 1.065 |
|  |  |  | Months Quit | -0.00037 | 0.00077 | 0.23 | 0.6306 | 1.000 |
|  |  |  |  |  |  |  |  |  |
| 4A. | 5845.55 | 5535.00 | PM2.5 | 0.24233 | 0.14921 | 2.64 | 0.1044 | 1.274 |
|  |  |  | Average Packs | -0.53593 | 1.56561 | 0.12 | 0.7321 | 0.585 |
|  |  |  | Years Smoked | 0.06371 | 0.00904 | 49.72 | <0.0001 | 1.066 |
|  |  |  | Months Quit | -0.00037 | 0.00077 | 0.23 | 0.6298 | 1.000 |
|  |  |  | Ave Pck-x-Age (Yrs) | 0.01666 | 0.02221 | 0.56 | 0.4532 | 1.017 |
|  |  |  |  |  |  |  |  |  |
| 4B. | 5845.55 | 5533.85 | PM2.5 | 0.24034 | 0.14923 | 2.59 | 0.1073 | 1.272 |
|  |  |  | Average Packs | 6.53383 | 4.20348 | 2.42 | 0.1201 | 688.027 |
|  |  |  | Years Smoked | 0.06372 | 0.00903 | 49.74 | <0.0001 | 1.066 |
|  |  |  | Months Quit | -0.00036 | 0.00077 | 0.22 | 0.6385 | 1.000 |
|  |  |  | Ave Pck-x-Age (Yrs) | -0.19837 | 0.12187 | 2.65 | 0.1036 | 0.820 |
|  |  |  | Ave Pck-x-Age Squared | 0.00161 | 0.00089 | 3.21 | 0.0732 | 1.002 |
|  |  |  |  |  |  |  |  |  |
| 4C. | 5845.55 | 5535.70 | PM2.5 | 0.24082 | 0.14923 | 2.60 | 0.1066 | 1.272 |
|  |  |  | Average Packs | 5.90327 | 4.62480 | 1.63 | 0.2018 | 366.235 |
|  |  |  | Years Smoked | 0.06370 | 0.00903 | 49.76 | <0.0001 | 1.066 |
|  |  |  | Months Quit | -0.00037 | 0.00077 | 0.23 | 0.6330 | 1.000 |
|  |  |  | Ave Pck-x-Age (Yrs) | -0.22274 | 0.13748 | 2.62 | 0.1052 | 0.800 |
|  |  |  | Yrs Smk-x-Age Squared | 0.00272 | 0.00302 | 0.81 | 0.3678 | 1.000 |
|  |  |  | Yrs Smk-x-Age Cubed | -8.93 e-6 | 0.00002 | 0.14 | 0.7011 | 1.000 |
|  |  |  |  |  |  |  |  |  |

**APPENDIX 2: Fully adjusted models**

**Section 1: Models using pack-years**

97,303 subjects, 721,127 subject-cycle records, 1,992 events (0.3%), 1,402,807.3 person-years of follow-up (records with unknown pack-years, unknown years of smoking, or unknown time since quitting deleted). **Each model includes stratification by age-month and cycle, also with region and additional variables as covariates.**

**Additional covariates included in fully adjusted models:**

- **Median house value in census tract**
- **Median household income in census tract**
- **Body mass index**
- **Overall diet quality**
- **Alcohol consumption**
- **Physical activity**
- **Secondhand smoke from parent in childhood**
- **Secondhand smoke at home**
- **Secondhand smoke at work**
- **Duration of secondhand smoke at home**

|  | **AIC w/o Cov.** | **AIC w/ Cov.** | **Covariates** | **Est.** | **Std. Err.** | **Χ2** | **P(Χ2)** | **HR** |
| --- | --- | --- | --- | --- | --- | --- | --- | --- |
| 1. | 21810.08 | 21096.64 | PM2.5 | 0.06476 | 0.08400 | 0.59 | 0.4407 | 1.067 |
|  |  |  |  |  |  |  |  |  |
| 2. | 21810.08 | 19610.10 | PM2.5 | 0.06033 | 0.08404 | 0.51 | 0.4728 | 1.062 |
|  |  |  | Current v Never | 2.95759 | 0.08867 | 1112.57 | <0.0001 | 19.252 |
|  |  |  | Former v Never | 1.75807 | 0.08273 | 451.57 | <0.0001 | 5.801 |
|  |  |  |  |  |  |  |  |  |
| 3. | 21810.08 | 18705.14 | PM2.5 | 0.08226 | 0.08515 | 0.93 | 0.3340 | 1.086 |
|  |  |  | Current v Never | 1.29373 | 0.10718 | 145.69 | <0.0001 | 3.646 |
|  |  |  | Former v Never | 0.92230 | 0.08988 | 105.29 | <0.0001 | 2.515 |
|  |  |  | Pack-Years | 0.03039 | 0.00096 | 1005.85 | <0.0001 | 1.031 |
|  |  |  |  |  |  |  |  |  |
| 4. | 21810.08 | 18549.61 | PM2.5 | 0.05500 | 0.08502 | 0.42 | 0.5177 | 1.057 |
|  |  |  | Current v Never | 0.12926 | 0.14509 | 0.79 | 0.3730 | 1.138 |
|  |  |  | Former v Never | 0.11647 | 0.11570 | 1.01 | 0.3141 | 1.124 |
|  |  |  | Pack-Years | 0.02211 | 0.00116 | 361.76 | <0.0001 | 1.022 |
|  |  |  | Years Smoked | 0.03481 | 0.00281 | 153.52 | <0.0001 | 1.035 |
|  |  |  |  |  |  |  |  |  |
| 5. | 21810.08 | 18545.16 | PM2.5 | 0.05392 | 0.08499 | 0.40 | 0.5258 | 1.055 |
|  |  |  | Current v Never | 0.65219 | 0.24776 | 6.93 | 0.0085 | 1.920 |
|  |  |  | Former v Never | 0.67913 | 0.24592 | 7.62 | 0.0058 | 1.972 |
|  |  |  | Pack-Years | 0.02233 | 0.00117 | 366.31 | <0.0001 | 1.023 |
|  |  |  | Years Smoked | 0.02425 | 0.00493 | 24.20 | <0.0001 | 1.025 |
|  |  |  | Months Quit | -0.00108 | 0.00042 | 6.62 | 0.0101 | 0.999 |
|  |  |  |  |  |  |  |  |  |
| 6. | 21810.08 | 18548.57 | PM2.5 | 0.05263 | 0.08502 | 0.38 | 0.5359 | 1.054 |
|  |  |  | Pack-Years | 0.02202 | 0.00116 | 361.87 | <0.0001 | 1.022 |
|  |  |  | Years Smoked | 0.03638 | 0.00214 | 289.93 | <0.0001 | 1.037 |
|  |  |  | Months Quit | -0.00004 | 0.00018 | 0.05 | 0.8224 | 1.000 |
|  |  |  |  |  |  |  |  |  |
| 7A. | 21778.31 | 18491.76 | PM2.5 | 0.05603 | 0.08499 | 0.43 | 0.5097 | 1.058 |
|  |  |  | Pack-Years | 0.07379 | 0.00836 | 77.99 | <0.0001 | 1.077 |
|  |  |  | Years Smoked | 0.03676 | 0.00212 | 299.57 | <0.0001 | 1.037 |
|  |  |  | Months Quit | -0.00003 | 0.00018 | 0.04 | 0.8496 | 1.000 |
|  |  |  | Pack-Yr-x-Age (Yrs) | -0.00072 | 0.00011 | 38.76 | <0.0001 | 0.999 |
|  |  |  |  |  |  |  |  |  |
| 7B. | 21778.31 | 18493.76 | PM2.5 | 0.05603 | 0.08499 | 0.43 | 0.5098 | 1.058 |
|  |  |  | Pack-Years | 0.07357 | 0.06746 | 1.19 | 0.2755 | 1.076 |
|  |  |  | Years Smoked | 0.03676 | 0.00213 | 297.94 | <0.0001 | 1.037 |
|  |  |  | Months Quit | -0.00003 | 0.00018 | 0.03 | 0.8497 | 1.000 |
|  |  |  | Pack-Yr-x-Age (Yrs) | -0.00071 | 0.00191 | 0.14 | 0.7088 | 0.999 |
|  |  |  | Pack-Yr-x-Age Squared | 4.51 e-8 | 0.00001 | 0.01 | 0.9973 | 1.000 |
|  |  |  |  |  |  |  |  |  |
| 7C. | 21778.31 | 18495.19 | PM2.5 | 0.05667 | 0.08500 | 0.44 | 0.5050 | 1.058 |
|  |  |  | Pack-Years | -0.28488 | 0.47874 | 0.35 | 0.5518 | 0.752 |
|  |  |  | Years Smoked | 0.03674 | 0.00213 | 297.55 | <0.0001 | 1.037 |
|  |  |  | Months Quit | -0.00004 | 0.00018 | 0.04 | 0.8451 | 1.000 |
|  |  |  | Pack-Yr-x-Age (Yrs) | 0.01493 | 0.02076 | 0.52 | 0.4722 | 1.015 |
|  |  |  | Pack-Yr-x-Age Squared | -0.00022 | 0.00030 | 0.57 | 0.4496 | 1.000 |
|  |  |  | Pack-Yr-x-Age Cubed | 1.07e-6 | 1.42e-6 | 0.57 | 0.4492 | 1.000 |
|  |  |  |  |  |  |  |  |  |
| 8. | 21778.31 | 18810.61 | PM2.5 | 0.09163 | 0.08544 | 1.15 | 0.2836 | 1.096 |
|  |  |  | Pack-Years | -0.26558 | 0.43551 | 0.37 | 0.5420 | 0.767 |
|  |  |  | Pack-Yr-x-Age (Yrs) | 0.01551 | 0.01886 | 0.67 | 0.4111 | 1.016 |
|  |  |  | Pack-Yr-x-Age Squared | -0.00025 | 0.00027 | 0.83 | 0.3632 | 1.000 |
|  |  |  | Pack-Yr-x-Age Cubed | 1.23e-6 | 1.28e-6 | 0.92 | 0.3364 | 1.000 |

Based on Models 7C and 8, HRs per 10 pack-years were evaluated at different ages. Effect modification by age is shown in Figure S2.1.


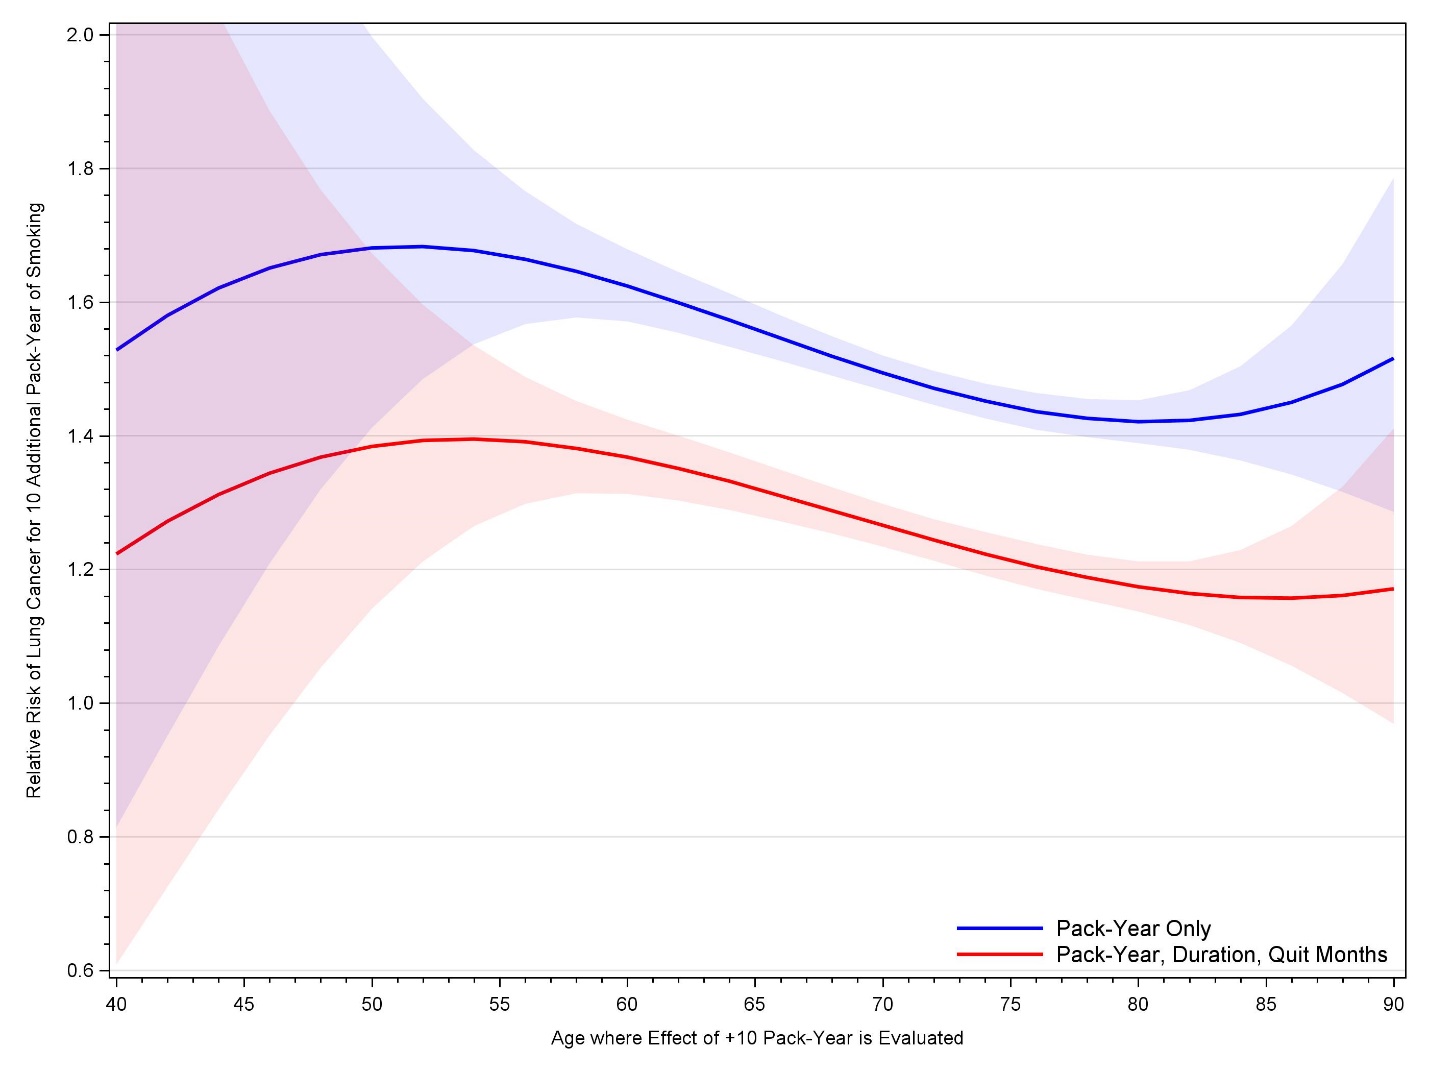


**Never Smokers**

44,245 subjects, 337,374 subject-cycle records, 179 events (0.1%), 659,099.5 person-years of follow-up. **Each model includes stratification by age-month and cycle, also with region and additional variables as covariates.**

|  | **AIC w/o Cov.** | **AIC w/ Cov.** | **Covariates** | **Est.** | **Std. Err.** | **Χ2** | **P(Χ2)** | **HR** |
| --- | --- | --- | --- | --- | --- | --- | --- | --- |
| 1. | 1667.02 | 1687.59 | PM2.5 | 0.23889 | 0.26052 | 0.84 | 0.3592 | 1.270 |
|  |  |  |  |  |  |  |  |  |

**Never or Former Smokers (Quit for ≥ 10 Years)**

83,819 subjects, 596,454 subject-cycle records, 833 events (0.1%), 1,161,499.3 person-years of follow-up (records with unknown pack-years, unknown years of smoking, or unknown time since quitting deleted). **Each model includes stratification by age-month and cycle, also with region and additional variables as covariates.**

|  | **AIC w/o Cov.** | **AIC w/ Cov.** | **Covariates** | **Est.** | **Std. Err.** | **Χ2** | **P(Χ2)** | **HR** |
| --- | --- | --- | --- | --- | --- | --- | --- | --- |
| 1. | 8768.15 | 8646.85 | PM2.5 | 0.18170 | 0.12972 | 1.96 | 0.1613 | 1.199 |
|  |  |  |  |  |  |  |  |  |
| 2. | 8768.15 | 8340.71 | PM2.5 | 0.23938 | 0.12996 | 3.39 | 0.0655 | 1.270 |
|  |  |  | Former v Never | 1.41410 | 0.08850 | 255.30 | <0.0001 | 4.113 |
|  |  |  |  |  |  |  |  |  |
| 3. | 8768.15 | 7984.418 | PM2.5 | 0.28349 | 0.13130 | 4.66 | 0.0308 | 1.328 |
|  |  |  | Former v Never | 0.56333 | 0.10440 | 29.12 | <0.0001 | 1.757 |
|  |  |  | Pack-Years | 0.03538 | 0.00172 | 421.11 | <0.0001 | 1.036 |
|  |  |  |  |  |  |  |  |  |
| 4. | 8768.15 | 7946.43 | PM2.5 | 0.26614 | 0.13121 | 4.11 | 0.0425 | 1.305 |
|  |  |  | Former v Never | 0.05511 | 0.13698 | 0.16 | 0.6875 | 1.057 |
|  |  |  | Pack-Years | 0.02635 | 0.00224 | 138.17 | <0.0001 | 1.027 |
|  |  |  | Years Smoked | 0.02936 | 0.00464 | 39.96 | <0.0001 | 1.030 |
|  |  |  |  |  |  |  |  |  |
| 5A. | 8768.15 | 7944.61 | PM2.5 | 0.26490 | 0.13117 | 4.08 | 0.0434 | 1.303 |
|  |  |  | Former v Never | 0.75062 | 0.37403 | 4.02 | 0.0448 | 2.118 |
|  |  |  | Pack-Years | 0.02658 | 0.00225 | 139.72 | <0.0001 | 1.027 |
|  |  |  | Years Smoked | 0.01703 | 0.00770 | 4.89 | 0.0269 | 1.017 |
|  |  |  | Months Quit | -0.00126 | 0.00063 | 3.94 | 0.0473 | 0.999 |
|  |  |  |  |  |  |  |  |  |
| 5B. | 8768.15 | 7942.09 | PM2.5 | 0.26608 | 0.13109 | 4.12 | 0.0424 | 1.305 |
|  |  |  | Former v Never | 0.48867 | 0.40329 | 1.47 | 0.2256 | 1.630 |
|  |  |  | Pack-Years | -0.73094 | 1.15803 | 0.39 | 0.5279 | 0.481 |
|  |  |  | Years Smoked | 0.02183 | 0.00812 | 7.23 | 0.0072 | 1.022 |
|  |  |  | Months Quit | -0.00084 | 0.00067 | 1.59 | 0.2072 | 0.999 |
|  |  |  | Pack-Yr-x-Age (Yrs) | 0.03196 | 0.04892 | 0.43 | 0.5135 | 1.032 |
|  |  |  | Pack-Yr-x-Age Squared | -0.00044 | 0.00068 | 0.41 | 0.5247 | 1.000 |
|  |  |  | Pack-Yr-x-Age Cubed | 1.93e-6 | 3.19e-6 | 0.36 | 0.5453 | 1.000 |
|  |  |  |  |  |  |  |  |  |
| 6. | 8768.15 | 7946.49 | PM2.5 | 0.26403 | 0.13121 | 4.05 | 0.0442 | 1.302 |
|  |  |  | Pack-Years | 0.02626 | 0.00224 | 137.70 | <0.0001 | 1.027 |
|  |  |  | Years Smoked | 0.03070 | 0.00362 | 72.12 | <0.0001 | 1.031 |
|  |  |  | Months Quit | -0.00007 | 0.00023 | 0.10 | 0.7508 | 1.000 |
|  |  |  |  |  |  |  |  |  |
| 7A. | 8768.15 | 7938.19 | PM2.5 | 0.26546 | 0.13109 | 4.10 | 0.0429 | 1.304 |
|  |  |  | Pack-Years | 0.08382 | 0.01785 | 22.04 | <0.0001 | 1.087 |
|  |  |  | Years Smoked | 0.03056 | 0.00361 | 71.81 | <0.0001 | 1.031 |
|  |  |  | Months Quit | -0.00009 | 0.00023 | 0.15 | 0.6978 | 1.000 |
|  |  |  | Pack-Yr-x-Age (Yrs) | -0.00077 | 0.00024 | 10.45 | 0.0012 | 0.999 |
|  |  |  |  |  |  |  |  |  |
| 7B. | 8768.15 | 7939.77 | PM2.5 | 0.26535 | 0.13109 | 4.09 | 0.0429 | 1.304 |
|  |  |  | Pack-Years | -0.01711 | 0.15713 | 0.01 | 0.9133 | 0.983 |
|  |  |  | Years Smoked | 0.03068 | 0.00361 | 72.20 | <0.0001 | 1.031 |
|  |  |  | Months Quit | -0.00008 | 0.00023 | 0.13 | 0.7136 | 1.000 |
|  |  |  | Pack-Yr-x-Age (Yrs) | 0.00202 | 0.00432 | 0.22 | 0.6400 | 1.002 |
|  |  |  | Pack-Yr-x-Age Squared | -0.00002 | 0.00003 | 0.42 | 0.5176 | 1.000 |
|  |  |  |  |  |  |  |  |  |
| 7C. | 8768.15 | 7941.52 | PM2.5 | 0.26565 | 0.13110 | 4.10 | 0.0427 | 1.304 |
|  |  |  | Pack-Years | -0.58087 | 1.14325 | 0.26 | 0.6114 | 0.559 |
|  |  |  | Years Smoked | 0.03065 | 0.00361 | 72.05 | <0.0001 | 1.031 |
|  |  |  | Months Quit | -0.00008 | 0.00023 | 0.13 | 0.7159 | 1.000 |
|  |  |  | Pack-Yr-x-Age (Yrs) | 0.02603 | 0.04836 | 0.29 | 0.5904 | 1.026 |
|  |  |  | Pack-Yr-x-Age Squared | -0.00036 | 0.00068 | 0.28 | 0.5984 | 1.000 |
|  |  |  | Pack-Yr-x-Age Cubed | 1.58e-6 | 3.15e-6 | 0.25 | 0.6176 | 1.000 |
|  |  |  |  |  |  |  |  |  |
| 8. | 8768.15 | 8006.86 | PM2.5 | 0.27594 | 0.13137 | 4.41 | 0.0357 | 1.318 |
|  |  |  | Pack-Years | -0.58570 | 1.07995 | 0.29 | 0.5876 | 0.557 |
|  |  |  | Pack-Yr-x-Age (Yrs) | 0.02783 | 0.04562 | 0.37 | 0.5419 | 1.028 |
|  |  |  | Pack-Yr-x-Age Squared | -0.00039 | 0.00064 | 0.38 | 0.5351 | 1.000 |
|  |  |  | Pack-Yr-x-Age Cubed | 1.82e-6 | 2.97e-6 | 0.38 | 0.5397 | 1.000 |

Based on Models 7C and 8, HRs per 10 pack-years were evaluated at different ages. Effect modification by age is shown below in Figure S2.2.


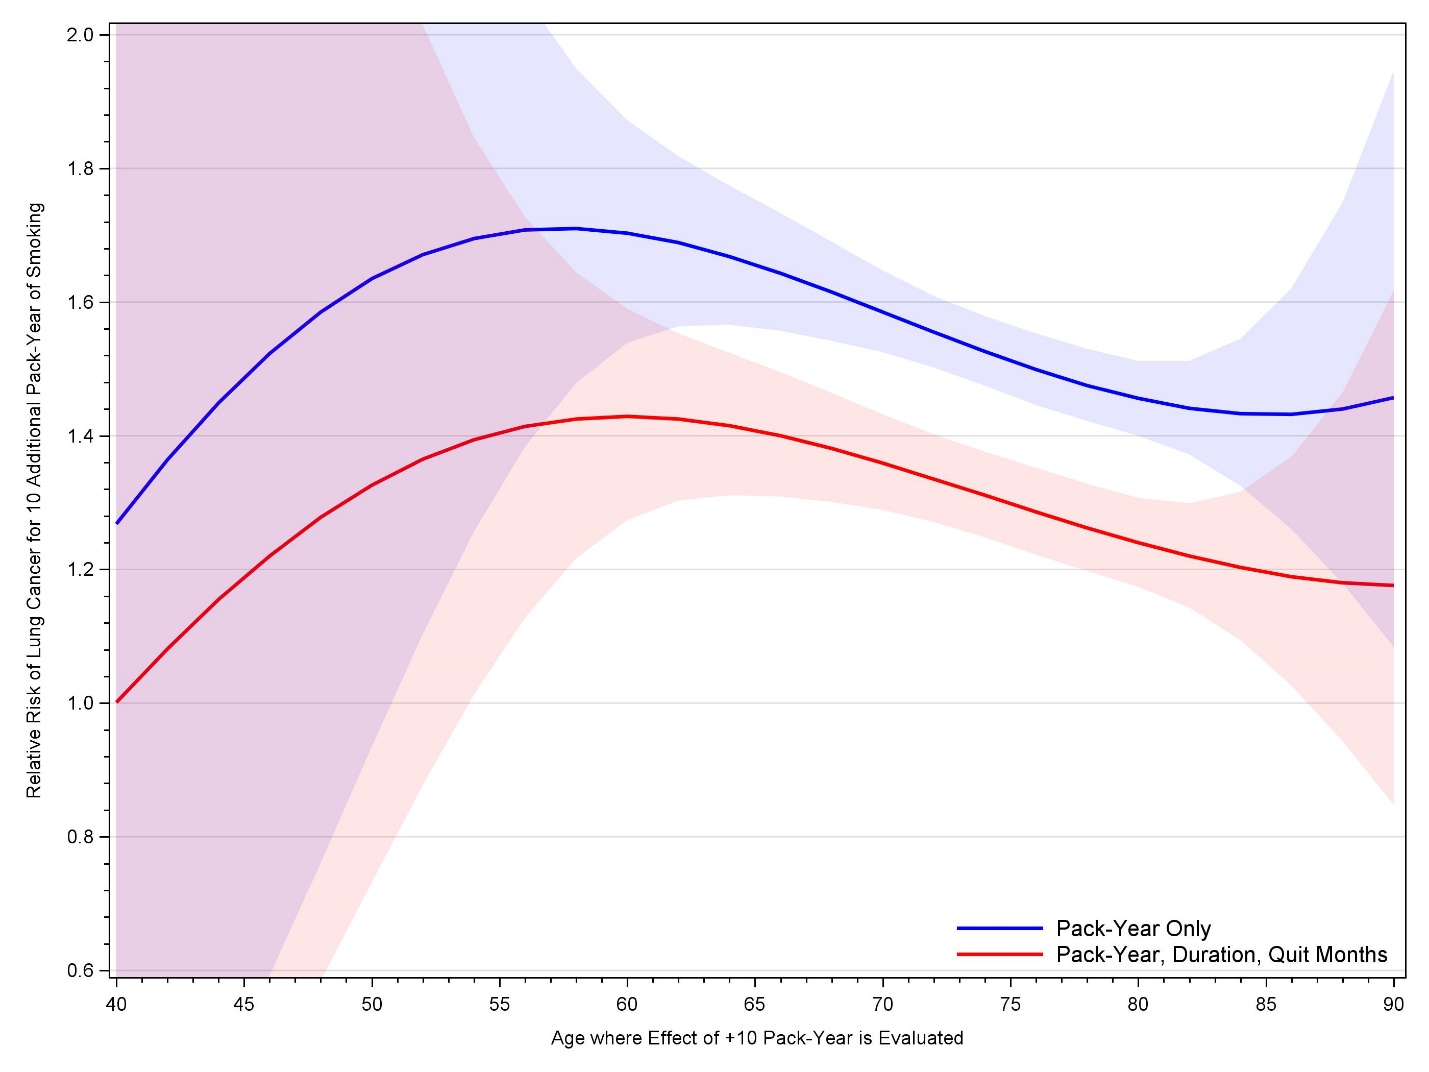


**Current or Former Smokers (Quit for < 10 Years)**

25,767 subjects, 124,673 subject-cycle records, 1,159 events (0.9%), 241,329.8 person-years of follow-up (records with unknown pack-years, unknown years of smoking, or unknown time since quitting deleted). **Each model includes stratification by age-month and cycle, also with region and additional variables as covariates.**

|  | **AIC w/o Cov.** | **AIC w/ Cov.** | **Covariates** | **Est.** | **Std. Err.** | **Χ2** | **P(Χ2)** | **HR** |
| --- | --- | --- | --- | --- | --- | --- | --- | --- |
| 1. | 8445.84 | 8386.18 | PM2.5 | -0.10282 | 0.11150 | 0.85 | 0.3564 | 0.902 |
|  |  |  |  |  |  |  |  |  |
| 2. | 8445.84 | 8355.80 | PM2.5 | -0.10368 | 0.11144 | 0.86 | 0.3522 | 0.902 |
|  |  |  | Current v Former | 0.35704 | 0.06336 | 31.75 | <0.0001 | 1.429 |
|  |  |  |  |  |  |  |  |  |
| 3. | 8445.84 | 8040.23 | PM2.5 | -0.06768 | 0.11352 | 0.35 | 0.5511 | 0.935 |
|  |  |  | Current v Former | 0.11341 | 0.06537 | 3.01 | 0.0827 | 1.120 |
|  |  |  | Pack-Years | 0.02347 | 0.00130 | 328.27 | <0.0001 | 1.024 |
|  |  |  |  |  |  |  |  |  |
| 4. | 8445.84 | 8017.92 | PM2.5 | -0.06801 | 0.11344 | 0.36 | 0.5488 | 0.934 |
|  |  |  | Current v Former | -0.02492 | 0.07140 | 0.12 | 0.7271 | 0.975 |
|  |  |  | Pack-Years | 0.02080 | 0.00141 | 218.41 | <0.0001 | 1.021 |
|  |  |  | Years Smoked | 0.03074 | 0.00654 | 22.11 | <0.0001 | 1.031 |
|  |  |  |  |  |  |  |  |  |
| 5A. | 8445.84 | 8018.83 | PM2.5 | -0.06818 | 0.11347 | 0.36 | 0.5479 | 0.934 |
|  |  |  | Current v Former | 0.05183 | 0.10351 | 0.25 | 0.6166 | 1.053 |
|  |  |  | Pack-Years | 0.02076 | 0.00141 | 217.43 | <0.0001 | 1.021 |
|  |  |  | Years Smoked | 0.03307 | 0.00699 | 22.38 | <0.0001 | 1.034 |
|  |  |  | Months Quit | 0.00158 | 0.00151 | 1.08 | 0.2975 | 1.002 |
|  |  |  |  |  |  |  |  |  |
| 5B. | 8445.84 | 8011.30 | PM2.5 | -0.07371 | 0.11327 | 0.31 | 0.5738 | 0.938 |
|  |  |  | Current v Former | 0.05020 | 0.10343 | 0.23 | 0.6274 | 1.051 |
|  |  |  | Pack-Years | -0.23106 | 0.88618 | 0.07 | 0.7943 | 0.794 |
|  |  |  | Years Smoked | 0.03170 | 0.00695 | 20.80 | <0.0001 | 1.032 |
|  |  |  | Months Quit | 0.00157 | 0.00151 | 1.08 | 0.2982 | 1.002 |
|  |  |  | Pack-Yr-x-Age (Yrs) | 0.01443 | 0.03873 | 0.14 | 0.7095 | 1.015 |
|  |  |  | Pack-Yr-x-Age Squared | -0.00025 | 0.00056 | 0.19 | 0.6602 | 1.000 |
|  |  |  | Pack-Yr-x-Age Cubed | 1.31e-6 | 2.69e-6 | 0.24 | 0.6263 | 1.000 |
|  |  |  |  |  |  |  |  |  |
| 6. | 8445.84 | 8017.09 | PM2.5 | -0.06780 | 0.11346 | 0.36 | 0.5501 | 0.934 |
|  |  |  | Pack-Years | 0.02079 | 0.00141 | 218.38 | <0.0001 | 1.021 |
|  |  |  | Years Smoked | 0.03322 | 0.00698 | 22.61 | <0.0001 | 1.034 |
|  |  |  | Months Quit | 0.00103 | 0.00105 | 0.96 | 0.3277 | 1.001 |
|  |  |  |  |  |  |  |  |  |
| 7A. | 8445.84 | 8007.01 | PM2.5 | -0.06363 | 0.11326 | 0.32 | 0.5742 | 0.938 |
|  |  |  | Pack-Years | 0.06931 | 0.01400 | 24.49 | <0.0001 | 1.072 |
|  |  |  | Years Smoked | 0.03220 | 0.00683 | 21.58 | <0.0001 | 1.033 |
|  |  |  | Months Quit | 0.00107 | 0.00105 | 1.04 | 0.3072 | 1.001 |
|  |  |  | Pack-Yr-x-Age (Yrs) | -0.00068 | 0.00019 | 12.10 | 0.0005 | 0.999 |
|  |  |  |  |  |  |  |  |  |
| 7B. | 8445.84 | 8007.76 | PM2.5 | -0.06342 | 0.11326 | 0.31 | 0.5755 | 0.939 |
|  |  |  | Pack-Years | 0.19727 | 0.11531 | 2.93 | 0.0871 | 1.218 |
|  |  |  | Years Smoked | 0.03186 | 0.00694 | 21.06 | <0.0001 | 1.032 |
|  |  |  | Months Quit | 0.00105 | 0.00105 | 1.00 | 0.3172 | 1.001 |
|  |  |  | Pack-Yr-x-Age (Yrs) | -0.00438 | 0.00331 | 1.75 | 0.1860 | 0.996 |
|  |  |  | Pack-Yr-x-Age Squared | 0.00003 | 0.00002 | 1.25 | 0.2636 | 1.000 |
|  |  |  |  |  |  |  |  |  |
| 7C. | 8445.84 | 8009.53 | PM2.5 | -0.06344 | 0.11327 | 0.32 | 0.5754 | 0.939 |
|  |  |  | Pack-Years | -0.22435 | 0.88603 | 0.06 | 0.8001 | 0.799 |
|  |  |  | Years Smoked | 0.03184 | 0.00695 | 21.01 | <0.0001 | 1.032 |
|  |  |  | Months Quit | 0.00104 | 0.00105 | 0.98 | 0.3209 | 1.001 |
|  |  |  | Pack-Yr-x-Age (Yrs) | 0.01414 | 0.03873 | 0.13 | 0.7150 | 1.014 |
|  |  |  | Pack-Yr-x-Age Squared | -0.00024 | 0.00056 | 0.19 | 0.6655 | 1.000 |
|  |  |  | Pack-Yr-x-Age Cubed | 1.29e-6 | 2.69e-6 | 0.23 | 0.6313 | 1.000 |
|  |  |  |  |  |  |  |  |  |
| 8. | 8445.84 | 8031.38 | PM2.5 | -0.06177 | 0.11336 | 0.30 | 0.5858 | 0.940 |
|  |  |  | Pack-Years | -0.22146 | 0.86968 | 0.06 | 0.7990 | 0.801 |
|  |  |  | Pack-Yr-x-Age (Yrs) | 0.01460 | 0.03800 | 0.15 | 0.7009 | 1.015 |
|  |  |  | Pack-Yr-x-Age Squared | -0.00025 | 0.00055 | 0.21 | 0.6430 | 1.000 |
|  |  |  | Pack-Yr-x-Age Cubed | 1.38e-6 | 2.64e-6 | 0.27 | 0.6017 | 1.000 |

Based on Models 7C and 8, HRs per 10 pack-years were evaluated at different ages. Effect modification by age is shown in Figure S2.3.


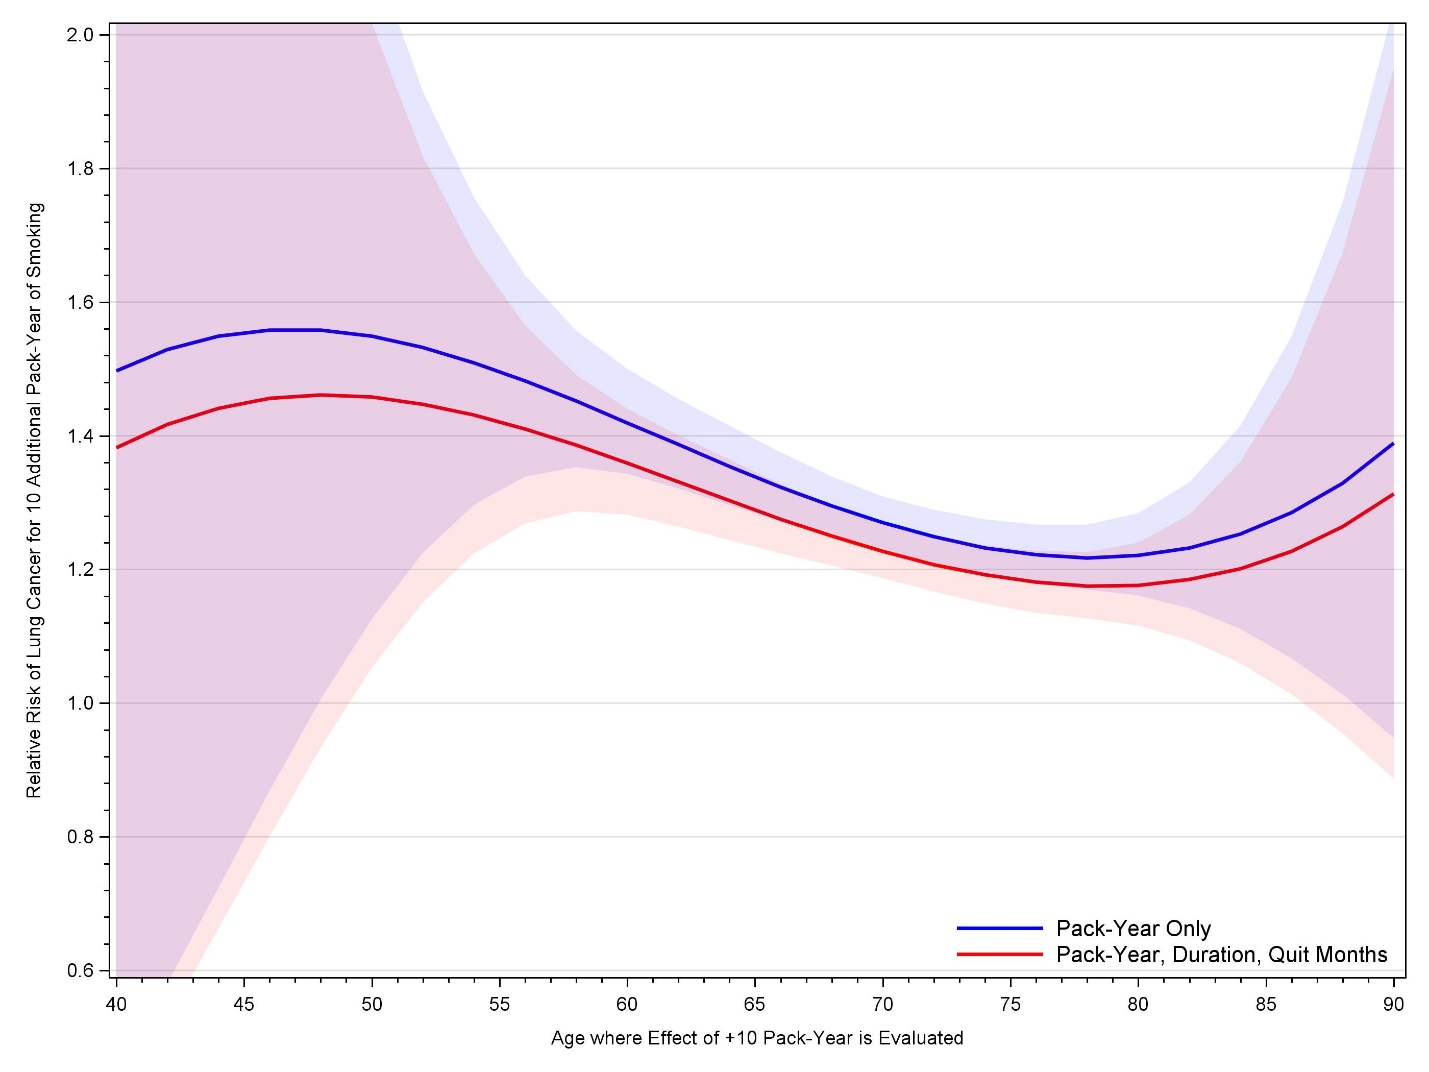


**Former Smokers Only (Quit for ≥ 10 Years)**

39,575 subjects, 259,080 subject-cycle records, 654 events (0.3%), 502,399.8 person-years of follow-up (records with unknown pack-years, unknown years of smoking, or unknown time since quitting deleted). **Each model includes stratification by age-month and cycle, also with region and additional variables as covariates.**

|  | **AIC w/o Cov.** | **AIC w/ Cov.** | **Covariates** | **Est.** | **Std. Err.** | **Χ2** | **P(Χ2)** | **HR** |
| --- | --- | --- | --- | --- | --- | --- | --- | --- |
| 1. | 5837.27 | 5815.26 | PM2.5 | 0.26919 | 0.15074 | 3.19 | 0.0741 | 1.309 |
|  |  |  |  |  |  |  |  |  |
| 2. | 5837.27 | 5462.76 | PM2.5 | 0.32317 | 0.15314 | 4.45 | 0.0348 | 1.382 |
|  |  |  | Pack-Years | 0.03590 | 0.00178 | 408.44 | <0.0001 | 1.037 |
|  |  |  |  |  |  |  |  |  |
| 3. | 5837.27 | 5422.81 | PM2.5 | 0.30013 | 0.15296 | 3.85 | 0.0497 | 1.350 |
|  |  |  | Pack-Years | 0.02670 | 0.00227 | 137.85 | <0.0001 | 1.027 |
|  |  |  | Years Smoked | 0.03119 | 0.00482 | 41.84 | <0.0001 | 1.032 |
|  |  |  |  |  |  |  |  |  |
| 4. | 5837.27 | 5423.69 | PM2.5 | 0.29944 | 0.15295 | 3.83 | 0.0503 | 1.349 |
|  |  |  | Pack-Years | 0.02684 | 0.00228 | 138.66 | <0.0001 | 1.027 |
|  |  |  | Years Smoked | 0.02235 | 0.00949 | 5.55 | 0.0185 | 1.027 |
|  |  |  | Months Quit | -0.00083 | 0.00077 | 1.15 | 0.2832 | 0.999 |
|  |  |  |  |  |  |  |  |  |
| 5A. | 5837.27 | 5419.70 | PM2.5 | 0.30011 | 0.15279 | 3.86 | 0.0495 | 1.350 |
|  |  |  | Pack-Years | 0.08206 | 0.02249 | 13.31 | 0.0003 | 1.086 |
|  |  |  | Years Smoked | 0.02107 | 0.00944 | 4.98 | 0.0256 | 1.021 |
|  |  |  | Months Quit | -0.00090 | 0.00077 | 1.38 | 0.2399 | 0.999 |
|  |  |  | Pack-Yr-x-Age (Yrs) | -0.00074 | 0.00030 | 6.06 | 0.0138 | 0.999 |
|  |  |  |  |  |  |  |  |  |
| 5B. | 5837.27 | 5421.65 | PM2.5 | 0.30018 | 0.15279 | 3.86 | 0.0495 | 1.350 |
|  |  |  | Pack-Years | 0.12321 | 0.19926 | 0.38 | 0.5364 | 1.131 |
|  |  |  | Years Smoked | 0.02103 | 0.00944 | 4.96 | 0.0259 | 1.021 |
|  |  |  | Months Quit | -0.00090 | 0.00077 | 1.38 | 0.2401 | 0.999 |
|  |  |  | Pack-Yr-x-Age (Yrs) | -0.00188 | 0.00548 | 0.12 | 0.7321 | 0.998 |
|  |  |  | Pack-Yr-x-Age Squared | 7.80 e-6 | 0.00004 | 0.04 | 0.8354 | 1.000 |
|  |  |  |  |  |  |  |  |  |
| 5C. | 5837.27 | 5423.36 | PM2.5 | 0.30089 | 0.15286 | 3.87 | 0.0490 | 1.351 |
|  |  |  | Pack-Years | -0.63181 | 1.41139 | 0.20 | 0.6544 | 0.532 |
|  |  |  | Years Smoked | 0.02097 | 0.00944 | 4.94 | 0.0263 | 1.021 |
|  |  |  | Months Quit | -0.00091 | 0.00077 | 1.39 | 0.2386 | 0.999 |
|  |  |  | Pack-Yr-x-Age (Yrs) | 0.03024 | 0.05965 | 0.26 | 0.6121 | 1.031 |
|  |  |  | Pack-Yr-x-Age Squared | -0.00044 | 0.00083 | 0.28 | 0.5952 | 1.000 |
|  |  |  | Pack-Yr-x-Age Cubed | 2.10e-6 | 3.89e-6 | 0.29 | 0.5882 | 1.000 |
|  |  |  |  |  |  |  |  |  |
| 6. | 5837.27 | 5461.25 | PM2.5 | 0.32476 | 0.15307 | 4.50 | 0.0355 | 1.384 |
|  |  |  | Pack-Years | -0.60916 | 1.36849 | 0.20 | 0.6562 | 0.544 |
|  |  |  | Pack-Yr-x-Age (Yrs) | 0.03048 | 0.05780 | 0.28 | 0.5890 | 1.031 |
|  |  |  | Pack-Yr-x-Age Squared | -0.00046 | 0.00081 | 0.32 | 0.5717 | 1.000 |
|  |  |  | Pack-Yr-x-Age Cubed | 2.22e-6 | 3.76e-6 | 0.35 | 0.5563 | 1.000 |

Based on Models 5C and 6, HRs per 10 pack-years were evaluated at different ages. Effect modification by age is shown below in Figure S2.4.


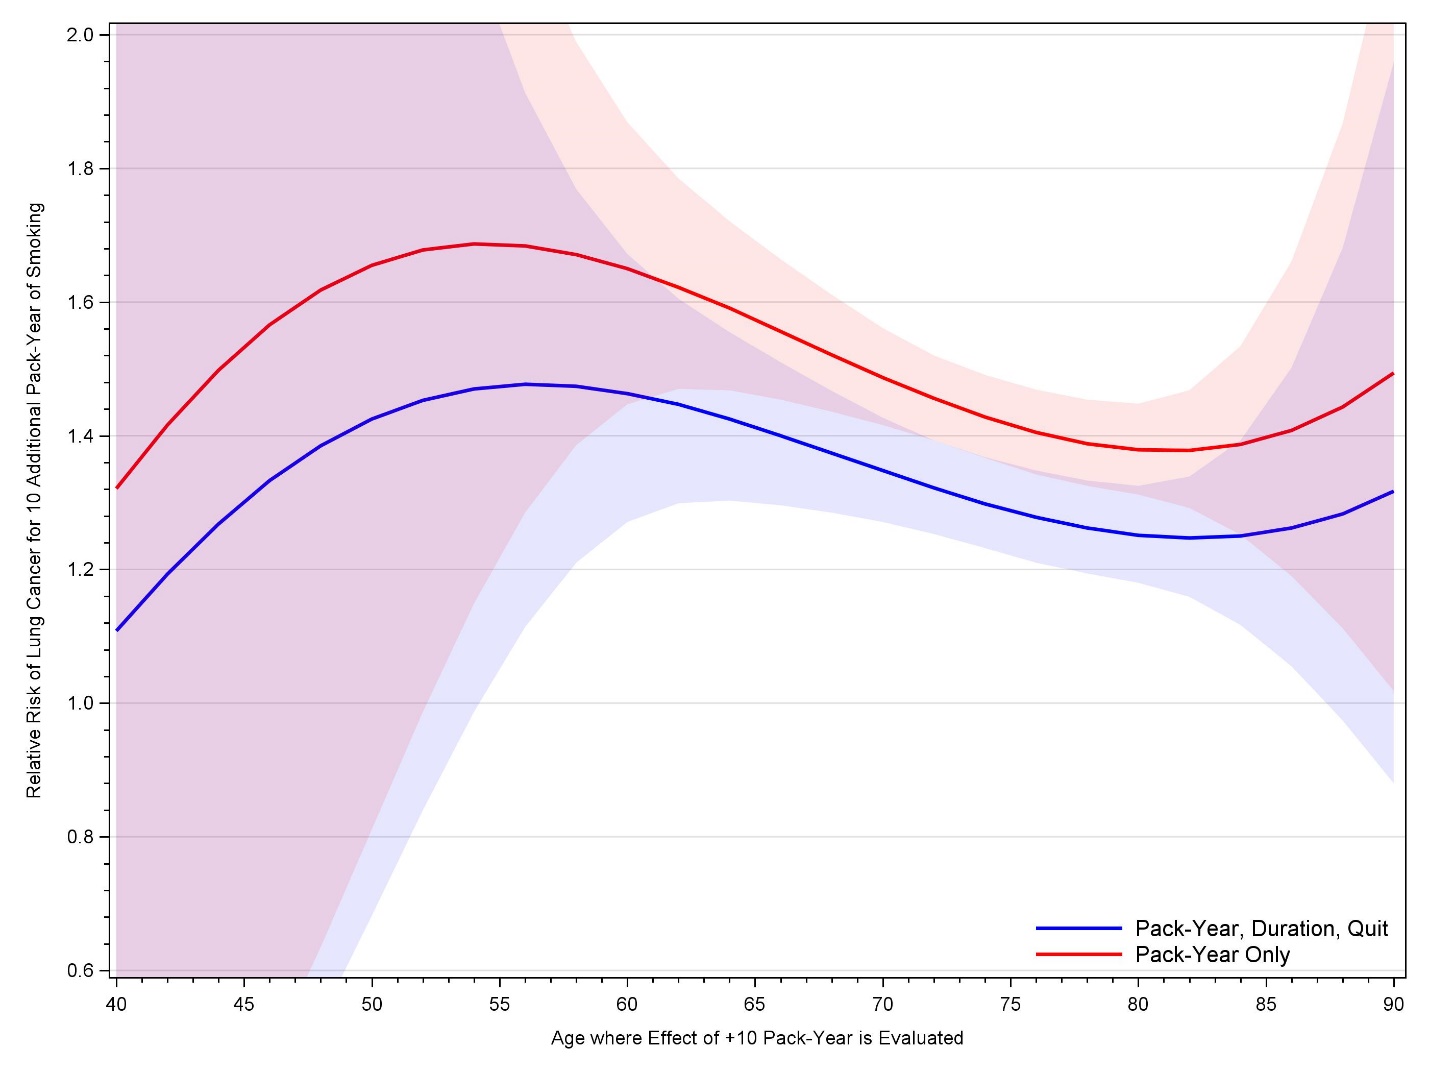


**Section 2: Models using average packs**

97,303 subjects, 721,127 subject-cycle records, 1,992 events (0.3%), 1,402,807.3 person-years of follow-up (records with unknown pack-years, unknown years of smoking, or unknown time since quitting deleted). **Each model includes stratification by age-month and cycle, also with region and additional variables as covariates.**

|  | **AIC w/o Cov.** | **AIC w/ Cov.** | **Covariates** | **Est.** | **Std. Err.** | **Χ2** | **P(Χ2)** | **HR** |
| --- | --- | --- | --- | --- | --- | --- | --- | --- |
| 1. | 21810.08 | 21096.64 | PM2.5 | 0.06476 | 0.08400 | 0.59 | 0.4407 | 1.067 |
|  |  |  |  |  |  |  |  |  |
| 2. | 21810.08 | 19610.10 | PM2.5 | 0.06033 | 0.08404 | 0.51 | 0.4728 | 1.062 |
|  |  |  | Current v Never | 2.95759 | 0.08867 | 1112.57 | <0.0001 | 19.252 |
|  |  |  | Former v Never | 1.75807 | 0.08273 | 451.57 | <0.0001 | 5.801 |
|  |  |  |  |  |  |  |  |  |
| 3. | 21810.08 | 18859.40 | PM2.5 | 0.02126 | 0.08437 | 0.06 | 0.8010 | 1.021 |
|  |  |  | Current v Never | -0.34999 | 0.16193 | 4.67 | 0.0307 | 0.705 |
|  |  |  | Former v Never | -0.39287 | 0.13201 | 8.86 | 0.0029 | 0.675 |
|  |  |  | Average Packs | 1.01119 | 0.14172 | 50.91 | <0.0001 | 2.749 |
|  |  |  | Years Smoked | 0.06645 | 0.00259 | 657.31 | <0.0001 | 1.069 |
|  |  |  |  |  |  |  |  |  |
| 4. | 21810.08 | 18858.02 | PM2.5 | 0.02043 | 0.08435 | 0.06 | 0.8087 | 1.021 |
|  |  |  | Current v Never | 0.01185 | 0.25202 | 0.01 | 0.9625 | 1.012 |
|  |  |  | Former v Never | -0.00120 | 0.24787 | 0.01 | 0.9961 | 0.999 |
|  |  |  | Average Packs | 1.03797 | 0.14212 | 53.34 | <0.0001 | 2.823 |
|  |  |  | Years Smoked | 0.05921 | 0.00464 | 162.55 | <0.0001 | 1.061 |
|  |  |  | Months Quit | -0.00078 | 0.00042 | 3.45 | 0.0634 | 0.999 |
|  |  |  |  |  |  |  |  |  |
| 5. | 21810.08 | 18854.06 | PM2.5 | 0.02054 | 0.08435 | 0.06 | 0.8076 | 1.020 |
|  |  |  | Average Packs | 1.04356 | 0.13661 | 58.36 | <0.0001 | 2.850 |
|  |  |  | Years Smoked | 0.05933 | 0.00162 | 1333.17 | <0.0001 | 1.061 |
|  |  |  | Months Quit | -0.00080 | 0.00021 | 14.71 | 0.0001 | 0.999 |
|  |  |  |  |  |  |  |  |  |
| 6A. | 21810.08 | 18855.84 | PM2.5 | 0.02065 | 0.08435 | 0.06 | 0.8066 | 1.021 |
|  |  |  | Average Packs | 0.55492 | 1.04591 | 0.28 | 0.5957 | 1.742 |
|  |  |  | Years Smoked | 0.05930 | 0.00163 | 1330.07 | <0.0001 | 1.061 |
|  |  |  | Months Quit | -0.00081 | 0.00021 | 14.92 | 0.0001 | 0.999 |
|  |  |  | Ave Pck-x-Age (Yrs) | 0.00719 | 0.01519 | 0.22 | 0.6358 | 1.007 |
|  |  |  |  |  |  |  |  |  |
| 6B. | 21810.08 | 18856.40 | PM2.5 | 0.02128 | 0.08435 | 0.06 | 0.8008 | 1.022 |
|  |  |  | Average Packs | 3.47661 | 2.63948 | 1.73 | 0.1878 | 32.350 |
|  |  |  | Years Smoked | 0.05928 | 0.00163 | 1328.60 | <0.0001 | 1.061 |
|  |  |  | Months Quit | -0.00081 | 0.00021 | 15.02 | 0.0001 | 0.999 |
|  |  |  | Ave Pck-x-Age (Yrs) | -0.08287 | 0.07648 | 1.17 | 0.2786 | 0.920 |
|  |  |  | Ave Pck-x-Age Squared | 0.00068 | 0.00057 | 1.44 | 0.2293 | 1.001 |
|  |  |  |  |  |  |  |  |  |
| 6C. | 21810.08 | 18857.65 | PM2.5 | 0.02155 | 0.08435 | 0.06 | 0.7983 | 1.022 |
|  |  |  | Average Packs | 1.82597 | 3.41068 | 0.29 | 0.5924 | 6.209 |
|  |  |  | Years Smoked | 0.05928 | 0.00163 | 1328.31 | <0.0001 | 1.061 |
|  |  |  | Months Quit | -0.00081 | 0.00021 | 15.02 | 0.0001 | 0.999 |
|  |  |  | Ave Pck-x-Age (Yrs) | -0.10760 | 0.08203 | 1.72 | 0.1896 | 0.898 |
|  |  |  | Ave Pck-x-Age Squared | 0.00248 | 0.00220 | 1.27 | 0.2601 | 1.002 |
|  |  |  | Ave Pck-x-Age Cubed | -0.00002 | 0.00002 | 0.70 | 0.4027 | 1.000 |
|  |  |  |  |  |  |  |  |  |

**Never Smokers**

44,245 subjects, 337,374 subject-cycle records, 179 events (0.1%), 659,099.5 person-years of follow-up (records with unknown pack-years, unknown years of smoking, or unknown time since quitting deleted). **Each model includes stratification by age-month and cycle, also with region as covariate**

**Also include all the additional variables listed in previous section.**

|  | **AIC w/o Cov.** | **AIC w/ Cov.** | **Covariates** | **Est.** | **Std. Err.** | **Χ2** | **P(Χ2)** | **HR** |
| --- | --- | --- | --- | --- | --- | --- | --- | --- |
| 1. | 1667.02 | 1687.59 | PM2.5 | 0.23889 | 0.26052 | 0.84 | 0.3592 | 1.270 |
|  |  |  |  |  |  |  |  |  |

**Never or Former Smokers (Quit for ≥ 10 Years)**

83,819 subjects, 596,454 subject-cycle records, 833 events (0.1%), 1,161,499.3 person-years of follow-up (records with unknown pack-years, unknown years of smoking, or unknown time since quitting deleted). **Each model includes stratification by age-month and cycle, also with region and additional variables as covariates.**

|  | **AIC w/o Cov.** | **AIC w/ Cov.** | **Covariates** | **Est.** | **Std. Err.** | **Χ2** | **P(Χ2)** | **HR** |
| --- | --- | --- | --- | --- | --- | --- | --- | --- |
| 1. | 8778.12 | 8658.05 | PM2.5 | 0.18348 | 0.12965 | 2.00 | 0.1570 | 1.201 |
|  |  |  |  |  |  |  |  |  |
| 2. | 8778.12 | 8349.63 | PM2.5 | 0.24140 | 0.12989 | 3.45 | 0.0631 | 1.273 |
|  |  |  | Former v Never | 1.41882 | 0.08850 | 257.03 | <0.0001 | 4.132 |
|  |  |  |  |  |  |  |  |  |
| 3. | 8778.12 | 8078.50 | PM2.5 | 0.22346 | 0.13021 | 2.94 | 0.0861 | 1.250 |
|  |  |  | Former v Never | -0.29127 | 0.16650 | 3.06 | 0.0802 | 0.747 |
|  |  |  | Average Packs | 0.63719 | 0.19923 | 10.22 | 0.0014 | 1.891 |
|  |  |  | Years Smoked | 0.06333 | 0.00413 | 234.60 | <0.0001 | 1.065 |
|  |  |  |  |  |  |  |  |  |
| 4. | 8778.12 | 8079.57 | PM2.5 | 0.22692 | 0.13017 | 3.04 | 0.0813 | 1.255 |
|  |  |  | Average Packs | 0.42504 | 0.17134 | 6.15 | 0.0131 | 1.530 |
|  |  |  | Years Smoked | 0.05756 | 0.00248 | 539.53 | <0.0001 | 1.059 |
|  |  |  |  |  |  |  |  |  |
| 5. | 8778.12 | 8078.09 | PM2.5 | 0.22171 | 0.13019 | 2.90 | 0.0886 | 1.248 |
|  |  |  | Former v Never | 0.24864 | 0.38048 | 0.43 | 0.5134 | 1.282 |
|  |  |  | Average Packs | 0.65054 | 0.19959 | 10.62 | 0.0011 | 1.917 |
|  |  |  | Years Smoked | 0.05397 | 0.00720 | 56.18 | <0.0001 | 1.055 |
|  |  |  | Months Quit | -0.00099 | 0.00063 | 2.46 | 0.1166 | 0.999 |
|  |  |  |  |  |  |  |  |  |
| 6. | 8778.12 | 8076.51 | PM2.5 | 0.22185 | 0.13021 | 2.90 | 0.0884 | 1.248 |
|  |  |  | Average Packs | 0.67857 | 0.19308 | 12.35 | 0.0004 | 1.971 |
|  |  |  | Years Smoked | 0.05840 | 0.00247 | 559.68 | <0.0001 | 1.060 |
|  |  |  | Months Quit | -0.00062 | 0.00028 | 4.99 | 0.0255 | 0.999 |
|  |  |  |  |  |  |  |  |  |
| 7A. | 8778.12 | 8078.50 | PM2.5 | 0.22193 | 0.13021 | 2.90 | 0.0883 | 1.248 |
|  |  |  | Average Packs | 0.49447 | 1.38141 | 0.13 | 0.7204 | 1.640 |
|  |  |  | Years Smoked | 0.05840 | 0.00247 | 559.75 | <0.0001 | 1.060 |
|  |  |  | Months Quit | -0.00062 | 0.00028 | 4.97 | 0.0257 | 0.999 |
|  |  |  | Ave Pck-x-Age (Yrs) | 0.00269 | 0.01992 | 0.02 | 0.8927 | 1.003 |
|  |  |  |  |  |  |  |  |  |
| 7B. | 8778.12 | 8078.46 | PM2.5 | 0.22105 | 0.13022 | 2.88 | 0.0896 | 1.247 |
|  |  |  | Average Packs | 6.09461 | 4.09884 | 2.21 | 0.1370 | 443.461 |
|  |  |  | Years Smoked | 0.05836 | 0.00247 | 558.71 | <0.0001 | 1.060 |
|  |  |  | Months Quit | -0.00063 | 0.00028 | 5.03 | 0.0249 | 0.999 |
|  |  |  | Ave Pck-x-Age (Yrs) | -0.16800 | 0.12014 | 1.95 | 0.1620 | 0.845 |
|  |  |  | Ave Pck-x-Age Squared | 0.00128 | 0.00089 | 2.07 | 0.1502 | 1.001 |
|  |  |  |  |  |  |  |  |  |
| 7C. | 8778.12 | 8079.84 | PM2.5 | 0.22132 | 0.13021 | 2.89 | 0.0892 | 1.248 |
|  |  |  | Average Packs | 4.96490 | 4.57287 | 1.18 | 0.2776 | 143.295 |
|  |  |  | Years Smoked | 0.05835 | 0.00247 | 558.09 | <0.0001 | 1.060 |
|  |  |  | Months Quit | -0.00063 | 0.00028 | 5.08 | 0.0241 | 0.999 |
|  |  |  | Ave Pck-x-Age (Yrs) | -0.21830 | 0.13715 | 2.53 | 0.1115 | 0.804 |
|  |  |  | Ave Pck-x-Age Squared | 0.00349 | 0.00300 | 1.35 | 0.2446 | 1.003 |
|  |  |  | Ave Pck-x-Age Cubed | -0.00002 | 0.00002 | 0.58 | 0.4457 | 1.000 |
|  |  |  |  |  |  |  |  |  |

**Current or Former Smokers (Quit for < 10 Years)**

25,767 subjects, 124,673 subject-cycle records, 1,159 events (0.9%), 241,329.8 person-years of follow-up (records with unknown pack-years, unknown years of smoking, or unknown time since quitting deleted). **Each model includes stratification by age-month and cycle, also with region and additional variables as covariates.**

|  | **AIC w/o Cov.** | **AIC w/ Cov.** | **Covariates** | **Est.** | **Std. Err.** | **Χ2** | **P(Χ2)** | **HR** |
| --- | --- | --- | --- | --- | --- | --- | --- | --- |
| 1. | 8454.28 | 8395.23 | PM2.5 | -0.10357 | 0.11144 | 0.86 | 0.3527 | 0.902 |
|  |  |  |  |  |  |  |  |  |
| 2. | 8454.28 | 8364.52 | PM2.5 | -0.10463 | 0.11138 | 0.88 | 0.3475 | 0.901 |
|  |  |  | Current v Former | 0.35871 | 0.06334 | 32.07 | <0.0001 | 1.431 |
|  |  |  |  |  |  |  |  |  |
| 3. | 8454.28 | 8145.34 | PM2.5 | -0.08601 | 0.11210 | 0.59 | 0.4429 | 0.918 |
|  |  |  | Current v Former | -0.09017 | 0.07153 | 1.59 | 0.2075 | 0.914 |
|  |  |  | Average Packs | 3.60876 | 0.28547 | 159.80 | <0.0001 | 36.92 |
|  |  |  | Years Smoked | 0.08017 | 0.00656 | 149.43 | <0.0001 | 1.083 |
|  |  |  |  |  |  |  |  |  |
| 4. | 8454.28 | 8144.92 | PM2.5 | -0.08698 | 0.11206 | 0.60 | 0.4377 | 0.917 |
|  |  |  | Average Packs | 3.50201 | 0.27122 | 166.72 | <0.0001 | 33.182 |
|  |  |  | Years Smoked | 0.07642 | 0.00578 | 175.02 | <0.0001 | 1.079 |
|  |  |  |  |  |  |  |  |  |
| 5. | 8454.28 | 8142.34 | PM2.5 | -0.08534 | 0.11218 | 0.58 | 0.4468 | 0.918 |
|  |  |  | Current v Former | 0.06987 | 0.10316 | 0.46 | 0.4982 | 1.072 |
|  |  |  | Average Packs | 3.74052 | 0.29455 | 161.27 | <0.0001 | 42.120 |
|  |  |  | Years Smoked | 0.08581 | 0.00718 | 142.71 | <0.0001 | 1.090 |
|  |  |  | Months Quit | 0.00341 | 0.00153 | 5.00 | 0.0253 | 1.003 |
|  |  |  |  |  |  |  |  |  |
| 6. | 8454.28 | 8140.80 | PM2.5 | -0.08512 | 0.11218 | 0.57 | 0.4480 | 0.918 |
|  |  |  | Average Packs | 3.75462 | 0.29388 | 163.23 | <0.0001 | 42.718 |
|  |  |  | Years Smoked | 0.08610 | 0.00717 | 144.14 | <0.0001 | 1.090 |
|  |  |  | Months Quit | 0.00268 | 0.00108 | 6.18 | 0.0129 | 1.003 |
|  |  |  |  |  |  |  |  |  |
| 7A. | 8454.28 | 8142.65 | PM2.5 | -0.08613 | 0.11223 | 0.59 | 0.4428 | 0.917 |
|  |  |  | Average Packs | 2.74909 | 2.57086 | 1.14 | 0.2849 | 15.628 |
|  |  |  | Years Smoked | 0.08633 | 0.00720 | 143.74 | <0.0001 | 1.090 |
|  |  |  | Months Quit | 0.00270 | 0.00108 | 6.27 | 0.0123 | 1.003 |
|  |  |  | Ave Pck-x-Age (Yrs) | 0.01489 | 0.03775 | 0.15 | 0.6932 | 1.015 |
|  |  |  |  |  |  |  |  |  |
| 7B. | 8454.28 | 8144.04 | PM2.5 | -0.08563 | 0.11223 | 0.58 | 0.4455 | 0.918 |
|  |  |  | Average Packs | 4.89535 | 3.77013 | 1.68 | 0.1941 | 133.667 |
|  |  |  | Years Smoked | 0.08651 | 0.00721 | 143.92 | <0.0001 | 1.090 |
|  |  |  | Months Quit | 0.00273 | 0.00108 | 6.41 | 0.0114 | 1.003 |
|  |  |  | Ave Pck-x-Age (Yrs) | -0.05967 | 0.10284 | 0.34 | 0.5617 | 0.942 |
|  |  |  | Ave Pck-x-Age Squared | 0.00063 | 0.00080 | 0.61 | 0.4354 | 1.001 |
|  |  |  |  |  |  |  |  |  |
| 7C. | 8454.28 | 8144.98 | PM2.5 | -0.08401 | 0.11228 | 0.56 | 0.4543 | 0.919 |
|  |  |  | Average Packs | 13.82772 | 9.33956 | 2.19 | 0.1387 | >999 |
|  |  |  | Years Smoked | 0.08652 | 0.00720 | 144.51 | <0.0001 | 1.090 |
|  |  |  | Months Quit | 0.00271 | 0.00108 | 6.31 | 0.0120 | 1.003 |
|  |  |  | Ave Pck-x-Age (Yrs) | -0.04704 | 0.10357 | 0.21 | 0.6497 | 0.954 |
|  |  |  | Ave Pck-x-Age Squared | -0.00564 | 0.00607 | 0.86 | 0.3525 | 0.994 |
|  |  |  | Ave Pck-x-Age Cubed | 0.00006 | 0.00006 | 1.09 | 0.2968 | 1.000 |
|  |  |  |  |  |  |  |  |  |

**Former Smokers Only (Quit for ≥ 10 Years)**

39,575 subjects, 259,080 subject-cycle records, 654 events (0.3%), 502,399.8 person-years of follow-up (records with unknown pack-years, unknown years of smoking, or unknown time since quitting deleted). **Each model includes stratification by age-month and cycle, also with region and additional variables as covariates.**

|  | **AIC w/o Cov.** | **AIC w/ Cov.** | **Covariates** | **Est.** | **Std. Err.** | **Χ2** | **P(Χ2)** | **HR** |
| --- | --- | --- | --- | --- | --- | --- | --- | --- |
| 1. | 5845.55 | 5824.32 | PM2.5 | 0.27182 | 0.15062 | 3.26 | 0.0711 | 1.312 |
|  |  |  |  |  |  |  |  |  |
| 2. | 5845.55 | 5555.65 | PM2.5 | 0.24348 | 0.15124 | 2.59 | 0.1074 | 1.276 |
|  |  |  | Average Packs | 0.63371 | 0.20194 | 9.85 | 0.0017 | 1.885 |
|  |  |  | Years Smoked | 0.06552 | 0.00433 | 228.89 | <0.0001 | 1.068 |
|  |  |  |  |  |  |  |  |  |
| 3. | 5845.55 | 5557.31 | PM2.5 | 0.24043 | 0.15134 | 2.52 | 0.1122 | 1.272 |
|  |  |  | Average Packs | 0.65209 | 0.20166 | 10.46 | 0.0012 | 1.920 |
|  |  |  | Years Smoked | 0.06073 | 0.00905 | 45.02 | <0.0001 | 1.063 |
|  |  |  | Months Quit | -0.00049 | 0.00078 | 0.41 | 0.5235 | 1.000 |
|  |  |  |  |  |  |  |  |  |
| 4A. | 5845.55 | 5558.84 | PM2.5 | 0.24337 | 0.15127 | 2.59 | 0.1077 | 1.276 |
|  |  |  | Average Packs | -0.41508 | 1.58413 | 0.07 | 0.7933 | 0.660 |
|  |  |  | Years Smoked | 0.06117 | 0.00906 | 45.56 | <0.0001 | 1.063 |
|  |  |  | Months Quit | -0.00046 | 0.00078 | 0.35 | 0.5532 | 1.000 |
|  |  |  | Ave Pck-x-Age (Yrs) | 0.01524 | 0.02249 | 0.46 | 0.4979 | 1.015 |
|  |  |  |  |  |  |  |  |  |
| 4B. | 5845.55 | 5557.85 | PM2.5 | 0.24132 | 0.15129 | 2.54 | 0.1107 | 1.273 |
|  |  |  | Average Packs | 6.49945 | 4.23089 | 2.26 | 0.1245 | 664.779 |
|  |  |  | Years Smoked | 0.06119 | 0.00906 | 45.63 | <0.0001 | 1.063 |
|  |  |  | Months Quit | -0.00045 | 0.00078 | 0.34 | 0.5608 | 1.000 |
|  |  |  | Ave Pck-x-Age (Yrs) | -0.19541 | 0.12278 | 2.53 | 0.1115 | 0.822 |
|  |  |  | Ave Pck-x-Age Squared | 0.00158 | 0.00090 | 3.04 | 0.0814 | 1.002 |
|  |  |  |  |  |  |  |  |  |
| 4C. | 5837.27 | 5550.25 | PM2.5 | 0.24132 | 0.15137 | 2.54 | 0.1109 | 1.273 |
|  |  |  | Average Packs | 0.71556 | 0.20607 | 12.06 | 0.0005 | 2.045 |
|  |  |  | Years Smoked | -0.60696 | 2.27657 | 0.07 | 0.7898 | 0.545 |
|  |  |  | Months Quit | -0.00052 | 0.00077 | 0.45 | 0.4501 | 0.999 |
|  |  |  | Yrs Smk-x-Age (Yrs) | 0.03012 | 0.09731 | 0.09 | 0.7569 | 1.031 |
|  |  |  | Yrs Smk-x-Age Squared | -0.00043 | 0.00138 | 0.10 | 0.7539 | 1.000 |
|  |  |  | Yrs Smk-x-Age Cubed | 1.99 e-6 | 6.48e-6 | 0.09 | 0.7588 | 1.000 |
|  |  |  |  |  |  |  |  |  |

**APPENDIX 3: Secondary analyses**

**Section 1: Models using pack-years and different PM2.5 averaging times (without additional variables)**

**Full Cohort (Current, Never, and Former Smokers)**

| **PM** |  | **AIC w/o Cov.** | **AIC w/ Cov.** | **Covariates** | **Est.** | **Std. Err.** | **Χ2** | **P(Χ2)** | **HR** |
| --- | --- | --- | --- | --- | --- | --- | --- | --- | --- |
| **72** | 1. | 21788.31 | 21774.47 | PM2.5 | 0.02388 | 0.08291 | 0.08 | 0.7734 | 1.024 |
|  |  |  |  |  |  |  |  |  |  |
|  | 2. | 21778.31 | 18494.88 | PM2.5 | 0.04859 | 0.08406 | 0.33 | 0.5632 | 1.050 |
|  |  |  |  | Pack-Years | -0.30229 | 0.47802 | 0.40 | 0.5271 | 0.739 |
|  |  |  |  | Years Smoked | 0.03847 | 0.00208 | 343.45 | <0.0001 | 1.039 |
|  |  |  |  | Months Quit | -0.00006 | 0.00018 | 0.10 | 0.7475 | 1.000 |
|  |  |  |  | Pack-Yr-x-Age (Yrs) | 0.01582 | 0.02074 | 0.58 | 0.4456 | 1.016 |
|  |  |  |  | Pack-Yr-x-Age Squared | -0.00024 | 0.00030 | 0.65 | 0.4209 | 1.000 |
|  |  |  |  | Pack-Yr-x-Age Cubed | 1.15e-6 | 1.42e-6 | 0.66 | 0.4182 | 1.000 |
|  |  |  |  |  |  |  |  |  |  |
| **48** | 1. | 21788.31 | 21774.52 | PM2.5 | 0.01431 | 0.08357 | 0.03 | 0.8641 | 1.014 |
|  |  |  |  |  |  |  |  |  |  |
|  | 2. | 21778.31 | 18494.99 | PM2.5 | 0.03976 | 0.08470 | 0.22 | 0.6388 | 1.041 |
|  |  |  |  | Pack-Years | -0.30161 | 0.47802 | 0.40 | 0.5281 | 0.740 |
|  |  |  |  | Years Smoked | 0.03847 | 0.00208 | 343.53 | <0.0001 | 1.039 |
|  |  |  |  | Months Quit | -0.00006 | 0.00018 | 0.11 | 0.7451 | 1.000 |
|  |  |  |  | Pack-Yr-x-Age (Yrs) | 0.01579 | 0.02074 | 0.58 | 0.4465 | 1.016 |
|  |  |  |  | Pack-Yr-x-Age Squared | -0.00024 | 0.00030 | 0.64 | 0.4217 | 1.000 |
|  |  |  |  | Pack-Yr-x-Age Cubed | 1.15e-6 | 1.42e-6 | 0.65 | 0.4190 | 1.000 |
|  |  |  |  |  |  |  |  |  |  |
| **24** | 1. | 21788.31 | 21774.55 | PM2.5 | 0.00278 | 0.08376 | 0.00 | 0.9736 | 1.003 |
|  |  |  |  |  |  |  |  |  |  |
|  | 2. | 21778.31 | 18495.13 | PM2.5 | 0.02445 | 0.08491 | 0.08 | 0.7734 | 1.025 |
|  |  |  |  | Pack-Years | -0.30092 | 0.47802 | 0.40 | 0.5290 | 0.740 |
|  |  |  |  | Years Smoked | 0.03848 | 0.00208 | 343.61 | <0.0001 | 1.039 |
|  |  |  |  | Months Quit | -0.00006 | 0.00018 | 0.11 | 0.7406 | 1.000 |
|  |  |  |  | Pack-Yr-x-Age (Yrs) | 0.01576 | 0.02074 | 0.58 | 0.4474 | 1.016 |
|  |  |  |  | Pack-Yr-x-Age Squared | -0.00024 | 0.00030 | 0.64 | 0.4226 | 1.000 |
|  |  |  |  | Pack-Yr-x-Age Cubed | 1.14e-6 | 1.42e-6 | 0.65 | 0.4200 | 1.000 |

**Never Smokers**

| **PM** |  | **AIC w/o Cov.** | **AIC w/ Cov.** | **Covariates** | **Est.** | **Std. Err.** | **Χ2** | **P(Χ2)** | **HR** |
| --- | --- | --- | --- | --- | --- | --- | --- | --- | --- |
| **72** | 1. | 1667.02 | 1667.72 | PM2.5 | 0.21280 | 0.25937 | 0.67 | 0.4120 | 1.237 |
|  |  |  |  |  |  |  |  |  |  |
| **48** | 1. | 1667.02 | 1667.87 | PM2.5 | 0.18868 | 0.26103 | 0.52 | 0.4698 | 1.208 |
|  |  |  |  |  |  |  |  |  |  |
| **24** | 1. | 1667.02 | 1667.84 | PM2.5 | 0.18720 | 0.26112 | 0.51 | 0.4734 | 1.206 |

**Never or Former Smokers (Quit for ≥ 10 Years)**

| **PM** |  | **AIC w/o Cov.** | **AIC w/ Cov.** | **Covariates** | **Est.** | **Std. Err.** | **Χ2** | **P(Χ2)** | **HR** |
| --- | --- | --- | --- | --- | --- | --- | --- | --- | --- |
| **72** | 1. | 8768.14 | 8768.32 | PM2.5 | 0.13509 | 0.12794 | 1.11 | 0.2910 | 1.145 |
|  |  |  |  |  |  |  |  |  |  |
|  | 2. | 8768.14 | 7927.64 | PM2.5 | 0.25684 | 0.12973 | 3.92 | 0.0477 | 1.293 |
|  |  |  |  | Pack-Years | -0.48231 | 1.13605 | 0.18 | 0.6712 | 0.617 |
|  |  |  |  | Years Smoked | 0.03228 | 0.00352 | 84.08 | <0.0001 | 1.033 |
|  |  |  |  | Months Quit | -0.00004 | 0.00022 | 0.04 | 0.8484 | 1.000 |
|  |  |  |  | Pack-Yr-x-Age (Yrs) | 0.02220 | 0.04808 | 0.21 | 0.6443 | 1.022 |
|  |  |  |  | Pack-Yr-x-Age Squared | -0.00031 | 0.00067 | 0.21 | 0.6481 | 1.000 |
|  |  |  |  | Pack-Yr-x-Age Cubed | 1.37 e-6 | 3.14 e-6 | 0.19 | 0.6638 | 1.000 |
|  |  |  |  |  |  |  |  |  |  |
| **48** | 1. | 8768.14 | 8768.60 | PM2.5 | 0.11789 | 0.12878 | 0.84 | 0.3600 | 1.125 |
|  |  |  |  |  |  |  |  |  |  |
|  | 2. | 8768.14 | 7927.99 | PM2.5 | 0.24652 | 0.13057 | 3.56 | 0.0590 | 1.280 |
|  |  |  |  | Pack-Years | -0.47814 | 1.13582 | 0.18 | 0.6738 | 0.620 |
|  |  |  |  | Years Smoked | 0.03230 | 0.00352 | 84.13 | <0.0001 | 1.033 |
|  |  |  |  | Months Quit | -0.00004 | 0.00022 | 0.04 | 0.8464 | 1.000 |
|  |  |  |  | Pack-Yr-x-Age (Yrs) | 0.02201 | 0.04807 | 0.21 | 0.6470 | 1.022 |
|  |  |  |  | Pack-Yr-x-Age Squared | -0.00031 | 0.00067 | 0.20 | 0.6509 | 1.000 |
|  |  |  |  | Pack-Yr-x-Age Cubed | 1.37 e-6 | 3.14 e-6 | 0.18 | 0.6667 | 1.000 |
|  |  |  |  |  |  |  |  |  |  |
| **24** | 1. | 8768.14 | 8768.88 | PM2.5 | 0.09614 | 0.12918 | 0.55 | 0.4567 | 1.101 |
|  |  |  |  |  |  |  |  |  |  |
|  | 2. | 8768.14 | 7928.58 | PM2.5 | 0.22597 | 0.13098 | 2.98 | 0.0845 | 1.254 |
|  |  |  |  | Pack-Years | -0.47212 | 1.13544 | 0.17 | 0.6776 | 0.624 |
|  |  |  |  | Years Smoked | 0.03230 | 0.00352 | 84.17 | <0.0001 | 1.033 |
|  |  |  |  | Months Quit | -0.00004 | 0.00023 | 0.04 | 0.8427 | 1.000 |
|  |  |  |  | Pack-Yr-x-Age (Yrs) | 0.02176 | 0.04806 | 0.21 | 0.6507 | 1.022 |
|  |  |  |  | Pack-Yr-x-Age Squared | -0.00030 | 0.00067 | 0.20 | 0.6546 | 1.000 |
|  |  |  |  | Pack-Yr-x-Age Cubed | 1.34 e-6 | 3.14 e-6 | 0.18 | 0.6705 | 1.000 |

**Current or Former Smokers (Quit for < 10 Years)**

| **PM** |  | **AIC w/o Cov.** | **AIC w/ Cov.** | **Covariates** | **Est.** | **Std. Err.** | **Χ2** | **P(Χ2)** | **HR** |
| --- | --- | --- | --- | --- | --- | --- | --- | --- | --- |
| **72** | 1. | 8445.84 | 8441.06 | PM2.5 | -0.11217 | 0.11027 | 1.03 | 0.3091 | 0.894 |
|  |  |  |  |  |  |  |  |  |  |
|  | 2. | 8445.84 | 8009.18 | PM2.5 | -0.07826 | 0.11174 | 0.49 | 0.4837 | 0.925 |
|  |  |  |  | Pack-Years | -0.29630 | 0.88495 | 0.11 | 0.7378 | 0.744 |
|  |  |  |  | Years Smoked | 0.03372 | 0.00691 | 23.84 | <0.0001 | 1.034 |
|  |  |  |  | Months Quit | 0.00020 | 0.00103 | 0.04 | 0.8489 | 1.000 |
|  |  |  |  | Pack-Yr-x-Age (Yrs) | 0.01743 | 0.03870 | 0.20 | 0.6525 | 1.018 |
|  |  |  |  | Pack-Yr-x-Age Squared | -0.00029 | 0.00056 | 0.27 | 0.6031 | 1.000 |
|  |  |  |  | Pack-Yr-x-Age Cubed | 1.53e-6 | 2.69e-6 | 0.32 | 0.5695 | 1.000 |
|  |  |  |  |  |  |  |  |  |  |
| **48** | 1. | 8445.84 | 8440.98 | PM2.5 | -0.11752 | 0.11133 | 1.11 | 0.2912 | 0.889 |
|  |  |  |  |  |  |  |  |  |  |
|  | 2. | 8445.84 | 8009.09 | PM2.5 | -0.08575 | 0.11273 | 0.58 | 0.4468 | 0.918 |
|  |  |  |  | Pack-Years | -0.29656 | 0.88494 | 0.11 | 0.7375 | 0.743 |
|  |  |  |  | Years Smoked | 0.03372 | 0.00691 | 23.84 | <0.0001 | 1.034 |
|  |  |  |  | Months Quit | 0.00020 | 0.00103 | 0.04 | 0.8489 | 1.000 |
|  |  |  |  | Pack-Yr-x-Age (Yrs) | 0.01744 | 0.03870 | 0.20 | 0.6523 | 1.018 |
|  |  |  |  | Pack-Yr-x-Age Squared | -0.00029 | 0.00056 | 0.27 | 0.6029 | 1.000 |
|  |  |  |  | Pack-Yr-x-Age Cubed | 1.53 e-6 | 2.69 e-6 | 0.32 | 0.5693 | 1.000 |
|  |  |  |  |  |  |  |  |  |  |
| **24** | 1. | 8445.84 | 8440.94 | PM2.5 | -0.11992 | 0.11166 | 1.15 | 0.2828 | 0.887 |
|  |  |  |  |  |  |  |  |  |  |
|  | 2. | 8445.84 | 8008.95 | PM2.5 | -0.09584 | 0.11314 | 0.72 | 0.3969 | 0.909 |
|  |  |  |  | Pack-Years | -0.29587 | 0.88499 | 0.11 | 0.7381 | 0.744 |
|  |  |  |  | Years Smoked | 0.03373 | 0.00691 | 23.85 | <0.0001 | 1.034 |
|  |  |  |  | Months Quit | 0.00020 | 0.00103 | 0.04 | 0.8482 | 1.000 |
|  |  |  |  | Pack-Yr-x-Age (Yrs) | 0.01741 | 0.03870 | 0.20 | 0.6528 | 1.018 |
|  |  |  |  | Pack-Yr-x-Age Squared | -0.00029 | 0.00056 | 0.27 | 0.6034 | 1.000 |
|  |  |  |  | Pack-Yr-x-Age Cubed | 1.53e-6 | 2.69e-6 | 0.32 | 0.5698 | 1.000 |

**Former Smokers Only**

| **PM** |  | **AIC w/o Cov.** | **AIC w/ Cov.** | **Covariates** | **Est.** | **Std. Err.** | **Χ2** | **P(Χ2)** | **HR** |
| --- | --- | --- | --- | --- | --- | --- | --- | --- | --- |
| **72** | 1. | 5837.27 | 5839.81 | PM2.5 | 0.26740 | 0.14844 | 3.24 | 0.0716 | 1.307 |
|  |  |  |  |  |  |  |  |  |  |
|  | 2. | 5837.27 | 5400.66 | PM2.5 | 0.29592 | 0.15071 | 3.85 | 0.0496 | 1.344 |
|  |  |  |  | Pack-Years | -0.55049 | 1.40727 | 0.15 | 0.6957 | 0.577 |
|  |  |  |  | Years Smoked | 0.02339 | 0.00942 | 6.16 | 0.0131 | 1.024 |
|  |  |  |  | Months Quit | -0.00080 | 0.00077 | 1.08 | 0.2988 | 0.999 |
|  |  |  |  | Pack-Yr-x-Age (Yrs) | 0.02712 | 0.05948 | 0.21 | 0.6485 | 1.027 |
|  |  |  |  | Pack-Yr-x-Age Squared | -0.00040 | 0.00083 | 0.24 | 0.6270 | 1.000 |
|  |  |  |  | Pack-Yr-x-Age Cubed | 1.95e-6 | 3.88e-6 | 0.25 | 0.6154 | 1.000 |
|  |  |  |  |  |  |  |  |  |  |
| **48** | 1. | 5837.27 | 5840.16 | PM2.5 | 0.25388 | 0.14930 | 2.89 | 0.0890 | 1.289 |
|  |  |  |  |  |  |  |  |  |  |
|  | 2. | 5837.27 | 5400.94 | PM2.5 | 0.28694 | 0.15165 | 3.58 | 0.0585 | 1.332 |
|  |  |  |  | Pack-Years | -0.54507 | 1.40686 | 0.15 | 0.6984 | 0.580 |
|  |  |  |  | Years Smoked | 0.02342 | 0.00942 | 6.16 | 0.0129 | 1.024 |
|  |  |  |  | Months Quit | -0.00080 | 0.00077 | 1.08 | 0.2994 | 0.999 |
|  |  |  |  | Pack-Yr-x-Age (Yrs) | 0.02688 | 0.05947 | 0.20 | 0.6512 | 1.027 |
|  |  |  |  | Pack-Yr-x-Age Squared | -0.00040 | 0.00083 | 0.23 | 0.6297 | 1.000 |
|  |  |  |  | Pack-Yr-x-Age Cubed | 1.93e-6 | 3.88e-6 | 0.25 | 0.6182 | 1.000 |
|  |  |  |  |  |  |  |  |  |  |
| **24** | 1. | 5837.27 | 5840.91 | PM2.5 | 0.21944 | 0.14999 | 2.14 | 0.1435 | 1.245 |
|  |  |  |  |  |  |  |  |  |  |
|  | 2. | 5837.27 | 5401.77 | PM2.5 | 0.25257 | 0.15242 | 2.74 | 0.0975 | 1.287 |
|  |  |  |  | Pack-Years | -0.53525 | 1.40660 | 0.14 | 0.7036 | 0.586 |
|  |  |  |  | Years Smoked | 0.02344 | 0.00942 | 6.19 | 0.0129 | 1.024 |
|  |  |  |  | Months Quit | -0.00080 | 0.00077 | 1.08 | 0.2991 | 0.999 |
|  |  |  |  | Pack-Yr-x-Age (Yrs) | 0.02646 | 0.05946 | 0.20 | 0.6563 | 1.027 |
|  |  |  |  | Pack-Yr-x-Age Squared | -0.00040 | 0.00083 | 0.23 | 0.6347 | 1.000 |
|  |  |  |  | Pack-Yr-x-Age Cubed | 1.90e-6 | 3.88e-6 | 0.24 | 0.6232 | 1.000 |

**Current or Never Smokers**

| **PM** |  | **AIC w/o Cov.** | **AIC w/ Cov.** | **Covariates** | **Est.** | **Std. Err.** | **Χ2** | **P(Χ2)** | **HR** |
| --- | --- | --- | --- | --- | --- | --- | --- | --- | --- |
| **72** | 1. | 8760.95 | 8745.27 | PM2.5 | -0.13378 | 0.12222 | 1.20 | 0.2737 | 0.875 |
|  |  |  |  |  |  |  |  |  |  |
|  | 2. | 8760.95 | 6629.05 | PM2.5 | -0.11597 | 0.12529 | 0.86 | 0.3546 | 0.890 |
|  |  |  |  | Pack-Years | -0.40929 | 0.64674 | 0.40 | 0.5268 | 0.664 |
|  |  |  |  | Years Smoked | 0.04262 | 0.00274 | 241.98 | <0.0001 | 1.044 |
|  |  |  |  | Pack-Yr-x-Age (Yrs) | 0.02069 | 0.02825 | 0.54 | 0.4638 | 1.021 |
|  |  |  |  | Pack-Yr-x-Age Squared | -0.00031 | 0.00041 | 0.59 | 0.4421 | 1.000 |
|  |  |  |  | Pack-Yr-x-Age Cubed | 1.51e-6 | 1.96e-6 | 0.60 | 0.4388 | 1.000 |
|  |  |  |  |  |  |  |  |  |  |
| **48** | 1. | 8760.95 | 8745.00 | PM2.5 | -0.14971 | 0.12341 | 1.47 | 0.2251 | 0.861 |
|  |  |  |  |  |  |  |  |  |  |
|  | 2. | 8760.95 | 6628.78 | PM2.5 | -0.13407 | 0.12633 | 1.13 | 0.2886 | 0.875 |
|  |  |  |  | Pack-Years | -0.40851 | 0.64677 | 0.40 | 0.5276 | 0.665 |
|  |  |  |  | Years Smoked | 0.04262 | 0.00274 | 241.98 | <0.0001 | 1.044 |
|  |  |  |  | Pack-Yr-x-Age (Yrs) | 0.02066 | 0.02825 | 0.53 | 0.4646 | 1.021 |
|  |  |  |  | Pack-Yr-x-Age Squared | -0.00031 | 0.00041 | 0.59 | 0.4429 | 1.000 |
|  |  |  |  | Pack-Yr-x-Age Cubed | 1.51e-6 | 1.96e-6 | 0.60 | 0.4395 | 1.000 |
|  |  |  |  |  |  |  |  |  |  |
| **24** | 1. | 8760.95 | 8745.19 | PM2.5 | -0.13983 | 0.12360 | 1.28 | 0.2579 | 0.870 |
|  |  |  |  |  |  |  |  |  |  |
|  | 2. | 8760.95 | 6628.99 | PM2.5 | -0.12161 | 0.12664 | 0.92 | 0.3369 | 0.885 |
|  |  |  |  | Pack-Years | -0.40748 | 0.64677 | 0.40 | 0.5287 | 0.665 |
|  |  |  |  | Years Smoked | 0.04262 | 0.00274 | 241.90 | <0.0001 | 1.044 |
|  |  |  |  | Pack-Yr-x-Age (Yrs) | 0.02062 | 0.02825 | 0.53 | 0.4655 | 1.021 |
|  |  |  |  | Pack-Yr-x-Age Squared | -0.00031 | 0.00041 | 0.59 | 0.4437 | 1.000 |
|  |  |  |  | Pack-Yr-x-Age Cubed | 1.51e-6 | 1.96e-6 | 0.60 | 0.4403 | 1.000 |

**Models Using Average Packs (Total Pack-Years / Years Smoked, without additional variables)**

**Full Cohort (Current, Never, and Former Smokers)**

| **PM** |  | **AIC w/o Cov.** | **AIC w/ Cov.** | **Covariates** | **Est.** | **Std. Err.** | **Χ2** | **P(Χ2)** | **HR** |
| --- | --- | --- | --- | --- | --- | --- | --- | --- | --- |
| **72** | 1. | 21788.31 | 21774.47 | PM2.5 | 0.02388 | 0.08291 | 0.08 | 0.7734 | 1.024 |
|  |  |  |  |  |  |  |  |  |  |
|  | 2. | 21778.31 | 18810.86 | PM2.5 | 0.01691 | 0.08349 | 0.04 | 0.8395 | 1.017 |
|  |  |  |  | Average Packs | 1.11424 | 0.13596 | 67.16 | <0.0001 | 3.047 |
|  |  |  |  | Years Smoked | -0.63799 | 0.77831 | 0.67 | 0.4124 | 0.528 |
|  |  |  |  | Months Quit | -0.00082 | 0.00020 | 16.67 | <0.0001 | 0.999 |
|  |  |  |  | Yrs Smk-x-Age (Yrs) | 0.03193 | 0.03363 | 0.90 | 0.3424 | 1.032 |
|  |  |  |  | Yrs Smk-x-Age Squared | -0.00046 | 0.00048 | 0.91 | 0.3389 | 1.000 |
|  |  |  |  | Yrs Smk-x-Age Cubed | 2.11e-6 | 2.28e-6 | 0.86 | 0.3544 | 1.000 |
|  |  |  |  |  |  |  |  |  |  |
| **48** | 1. | 21788.31 | 21774.52 | PM2.5 | 0.01431 | 0.08357 | 0.03 | 0.8641 | 1.014 |
|  |  |  |  |  |  |  |  |  |  |
|  | 2. | 21778.31 | 18810.88 | PM2.5 | 0.01691 | 0.08349 | 0.04 | 0.8395 | 1.017 |
|  |  |  |  | Average Packs | 1.11424 | 0.13596 | 67.16 | <0.0001 | 3.047 |
|  |  |  |  | Years Smoked | -0.63799 | 0.77831 | 0.67 | 0.4124 | 0.528 |
|  |  |  |  | Months Quit | -0.00082 | 0.00020 | 16.67 | <0.0001 | 0.999 |
|  |  |  |  | Yrs Smk-x-Age (Yrs) | 0.03193 | 0.03363 | 0.90 | 0.3424 | 1.032 |
|  |  |  |  | Yrs Smk-x-Age Squared | -0.00046 | 0.00048 | 0.91 | 0.3389 | 1.000 |
|  |  |  |  | Yrs Smk-x-Age Cubed | 2.11e-6 | 2.28e-6 | 0.86 | 0.3544 | 1.000 |
|  |  |  |  |  |  |  |  |  |  |
| **24** | 1. | 21788.31 | 21774.55 | PM2.5 | 0.00278 | 0.08376 | 0.01 | 0.9736 | 1.003 |
|  |  |  |  |  |  |  |  |  |  |
|  | 2. | 21778.31 | 18810.90 | PM2.5 | -0.00180 | 0.08440 | 0.00 | 0.8829 | 0.998 |
|  |  |  |  | Average Packs | 1.11421 | 0.13597 | 67.15 | <0.0001 | 3.047 |
|  |  |  |  | Years Smoked | -0.63661 | 0.77833 | 0.67 | 0.4134 | 0.529 |
|  |  |  |  | Months Quit | -0.00083 | 0.00020 | 16.72 | <0.0001 | 0.999 |
|  |  |  |  | Yrs Smk-x-Age (Yrs) | 0.03187 | 0.03363 | 0.90 | 0.3434 | 1.032 |
|  |  |  |  | Yrs Smk-x-Age Squared | -0.00046 | 0.00048 | 0.91 | 0.3399 | 1.000 |
|  |  |  |  | Yrs Smk-x-Age Cubed | 2.11e-6 | 2.28e-6 | 0.86 | 0.3554 | 1.000 |

**Never Smokers**

| **PM** |  | **AIC w/o Cov.** | **AIC w/ Cov.** | **Covariates** | **Est.** | **Std. Err.** | **Χ2** | **P(Χ2)** | **HR** |
| --- | --- | --- | --- | --- | --- | --- | --- | --- | --- |
| **72** | 1. | 1667.02 | 1667.72 | PM2.5 | 0.21280 | 0.25937 | 0.67 | 0.4120 | 1.237 |
|  |  |  |  |  |  |  |  |  |  |
| **48** | 1. | 1667.02 | 1667.87 | PM2.5 | 0.18868 | 0.26103 | 0.52 | 0.4698 | 1.208 |
|  |  |  |  |  |  |  |  |  |  |
| **24** | 1. | 1667.02 | 1667.88 | PM2.5 | 0.18720 | 0.26112 | 0.51 | 0.4734 | 1.206 |

**Never or Former Smokers (Quit for ≥ 10 Years)**

| **PM** |  | **AIC w/o Cov.** | **AIC w/ Cov.** | **Covariates** | **Est.** | **Std. Err.** | **Χ2** | **P(Χ2)** | **HR** |
| --- | --- | --- | --- | --- | --- | --- | --- | --- | --- |
| **72** | 1. | 8768.14 | 8768.32 | PM2.5 | 0.13509 | 0.12794 | 1.11 | 0.2910 | 1.145 |
|  |  |  |  |  |  |  |  |  |  |
|  | 2. | 8768.14 | 8052.16 | PM2.5 | 0.21588 | 0.12893 | 2.80 | 0.0941 | 1.241 |
|  |  |  |  | Average Packs | 0.69476 | 0.19302 | 12.96 | 0.0003 | 2.003 |
|  |  |  |  | Years Smoked | -0.48281 | 1.54922 | 0.10 | 0.7553 | 0.617 |
|  |  |  |  | Months Quit | -0.00062 | 0.00027 | 5.24 | 0.0221 | 0.999 |
|  |  |  |  | Yrs Smk-x-Age (Yrs) | 0.02200 | 0.06574 | 0.11 | 0.7379 | 1.022 |
|  |  |  |  | Yrs Smk-x-Age Squared | -0.00028 | 0.00092 | 0.09 | 0.7622 | 1.000 |
|  |  |  |  | Yrs Smk-x-Age Cubed | 1.11e-6 | 4.31e-6 | 0.07 | 0.7969 | 1.000 |
|  |  |  |  |  |  |  |  |  |  |
| **48** | 1. | 8768.14 | 8768.60 | PM2.5 | 0.11789 | 0.12878 | 0.84 | 0.3600 | 1.125 |
|  |  |  |  |  |  |  |  |  |  |
|  | 2. | 8768.14 | 8052.44 | PM2.5 | 0.20598 | 0.12979 | 2.52 | 0.0941 | 1.241 |
|  |  |  |  | Average Packs | 0.69465 | 0.19302 | 12.95 | 0.0003 | 2.003 |
|  |  |  |  | Years Smoked | -0.48160 | 1.54914 | 0.10 | 0.7559 | 0.618 |
|  |  |  |  | Months Quit | -0.00062 | 0.00027 | 5.24 | 0.0220 | 0.999 |
|  |  |  |  | Yrs Smk-x-Age (Yrs) | 0.02194 | 0.06573 | 0.11 | 0.7385 | 1.022 |
|  |  |  |  | Yrs Smk-x-Age Squared | -0.00028 | 0.00092 | 0.09 | 0.7629 | 1.000 |
|  |  |  |  | Yrs Smk-x-Age Cubed | 1.11e-6 | 4.31e-6 | 0.07 | 0.7976 | 1.000 |
|  |  |  |  |  |  |  |  |  |  |
| **24** | 1. | 8768.14 | 8768.88 | PM2.5 | 0.09614 | 0.12918 | 0.55 | 0.4567 | 1.101 |
|  |  |  |  |  |  |  |  |  |  |
|  | 2. | 8768.14 | 8052.92 | PM2.5 | 0.18591 | 0.13014 | 2.04 | 0.1531 | 1.204 |
|  |  |  |  | Average Packs | 0.69436 | 0.19304 | 12.94 | 0.0003 | 2.002 |
|  |  |  |  | Years Smoked | -0.48037 | 1.54895 | 0.10 | 0.7565 | 0.619 |
|  |  |  |  | Months Quit | -0.00062 | 0.00027 | 5.26 | 0.0218 | 0.999 |
|  |  |  |  | Yrs Smk-x-Age (Yrs) | 0.02189 | 0.06573 | 0.11 | 0.7391 | 1.022 |
|  |  |  |  | Yrs Smk-x-Age Squared | -0.00028 | 0.00092 | 0.09 | 0.7635 | 1.000 |
|  |  |  |  | Yrs Smk-x-Age Cubed | 1.10e-6 | 4.31e-6 | 0.07 | 0.7983 | 1.000 |

**Current or Former Smokers (Quit for < 10 Years)**

| **PM** |  | **AIC w/o Cov.** | **AIC w/ Cov.** | **Covariates** | **Est.** | **Std. Err.** | **Χ2** | **P(Χ2)** | **HR** |
| --- | --- | --- | --- | --- | --- | --- | --- | --- | --- |
| **72** | 1. | 8445.84 | 8441.06 | PM2.5 | -0.11217 | 0.11027 | 1.03 | 0.3091 | 0.894 |
|  |  |  |  |  |  |  |  |  |  |
|  | 2. | 8445.84 | 8142.70 | PM2.5 | -0.10180 | 0.11088 | 0.84 | 0.3585 | 0.903 |
|  |  |  |  | Average Packs | 3.83232 | 0.29498 | 168.79 | <0.0001 | 46.170 |
|  |  |  |  | Years Smoked | 0.67717 | 3.10358 | 0.05 | 0.8273 | 1.968 |
|  |  |  |  | Months Quit | 0.00202 | 0.00106 | 3.62 | 0.0570 | 1.002 |
|  |  |  |  | Yrs Smk-x-Age (Yrs) | -0.02385 | 0.13539 | 0.03 | 0.8601 | 0.976 |
|  |  |  |  | Yrs Smk-x-Age Squared | 0.00034 | 0.00196 | 0.03 | 0.8617 | 1.000 |
|  |  |  |  | Yrs Smk-x-Age Cubed | -1.71e-6 | 9.37e-6 | 0.03 | 0.8554 | 1.000 |
|  |  |  |  |  |  |  |  |  |  |
| **48** | 1. | 8445.84 | 8440.98 | PM2.5 | -0.11752 | 0.11133 | 1.11 | 0.2912 | 0.889 |
|  |  |  |  |  |  |  |  |  |  |
|  | 2. | 8445.84 | 8142.60 | PM2.5 | -0.10871 | 0.11191 | 0.94 | 0.3314 | 0.897 |
|  |  |  |  | Average Packs | 3.83268 | 0.29497 | 168.839 | <0.0001 | 46.186 |
|  |  |  |  | Years Smoked | 0.67463 | 3.10374 | 0.05 | 0.8279 | 1.963 |
|  |  |  |  | Months Quit | 0.00202 | 0.00106 | 3.62 | 0.0571 | 1.002 |
|  |  |  |  | Yrs Smk-x-Age (Yrs) | -0.02374 | 0.13540 | 0.03 | 0.8608 | 0.977 |
|  |  |  |  | Yrs Smk-x-Age Squared | 0.00034 | 0.00196 | 0.03 | 0.8624 | 1.000 |
|  |  |  |  | Yrs Smk-x-Age Cubed | -1.70e-6 | 9.37e-6 | 0.03 | 0.8561 | 1.000 |
|  |  |  |  |  |  |  |  |  |  |
| **24** | 1. | 8445.84 | 8440.94 | PM2.5 | -0.11992 | 0.11166 | 1.15 | 0.2828 | 0.887 |
|  |  |  |  |  |  |  |  |  |  |
|  | 2. | 8445.84 | 8142.51 | PM2.5 | -0.11421 | 0.11231 | 1.03 | 0.3092 | 0.892 |
|  |  |  |  | Average Packs | 3.83278 | 0.29495 | 168.86 | <0.0001 | 46.191 |
|  |  |  |  | Years Smoked | 0.67815 | 3.10393 | 0.05 | 0.8271 | 1.970 |
|  |  |  |  | Months Quit | 0.00202 | 0.00106 | 3.62 | 0.0569 | 1.002 |
|  |  |  |  | Yrs Smk-x-Age (Yrs) | -0.02388 | 0.13540 | 0.03 | 0.8600 | 0.976 |
|  |  |  |  | Yrs Smk-x-Age Squared | 0.00034 | 0.00196 | 0.03 | 0.8617 | 1.000 |
|  |  |  |  | Yrs Smk-x-Age Cubed | -1.71e-6 | 9.37e-6 | 0.03 | 0.8555 | 1.000 |

**Former Smokers Only**

| **PM** |  | **AIC w/o Cov.** | **AIC w/ Cov.** | **Covariates** | **Est.** | **Std. Err.** | **Χ2** | **P(Χ2)** | **HR** |
| --- | --- | --- | --- | --- | --- | --- | --- | --- | --- |
| **72** | 1. | 5837.27 | 5839.81 | PM2.5 | 0.26740 | 0.14844 | 3.24 | 0.0716 | 1.307 |
|  |  |  |  |  |  |  |  |  |  |
|  | 2. | 5837.27 | 5526.70 | PM2.5 | 0.24044 | 0.14936 | 2.59 | 0.1074 | 1.272 |
|  |  |  |  | Average Packs | 0.69480 | 0.20408 | 11.59 | 0.0007 | 2.003 |
|  |  |  |  | Years Smoked | -0.55369 | 2.26487 | 0.06 | 0.8069 | 0.575 |
|  |  |  |  | Months Quit | -0.00043 | 0.00077 | 0.31 | 0.5789 | 1.000 |
|  |  |  |  | Yrs Smk-x-Age (Yrs) | 0.02880 | 0.09681 | 0.09 | 0.7661 | 1.029 |
|  |  |  |  | Yrs Smk-x-Age Squared | -0.00042 | 0.00137 | 0.09 | 0.7568 | 1.000 |
|  |  |  |  | Yrs Smk-x-Age Cubed | 2.00 e-6 | 6.45 e-6 | 0.10 | 0.7559 | 1.000 |
|  |  |  |  |  |  |  |  |  |  |
| **48** | 1. | 5837.27 | 5840.16 | PM2.5 | 0.25388 | 0.14930 | 2.89 | 0.0890 | 1.289 |
|  |  |  |  |  |  |  |  |  |  |
|  | 2. | 5837.27 | 5526.90 | PM2.5 | 0.23251 | 0.15032 | 2.39 | 0.1219 | 1.262 |
|  |  |  |  | Average Packs | 0.69474 | 0.20405 | 11.59 | 0.0007 | 2.003 |
|  |  |  |  | Years Smoked | -0.55553 | 2.26461 | 0.06 | 0.8062 | 0.574 |
|  |  |  |  | Months Quit | -0.00043 | 0.00077 | 0.31 | 0.5792 | 1.000 |
|  |  |  |  | Yrs Smk-x-Age (Yrs) | 0.02888 | 0.09680 | 0.09 | 0.7654 | 1.029 |
|  |  |  |  | Yrs Smk-x-Age Squared | -0.00043 | 0.00137 | 0.09 | 0.7562 | 1.000 |
|  |  |  |  | Yrs Smk-x-Age Cubed | 2.00 e-6 | 6.45 e-6 | 0.10 | 0.7554 | 1.000 |
|  |  |  |  |  |  |  |  |  |  |
| **24** | 1. | 5837.27 | 5840.91 | PM2.5 | 0.21944 | 0.14999 | 2.14 | 0.1435 | 1.245 |
|  |  |  |  |  |  |  |  |  |  |
|  | 2. | 5837.27 | 5527.55 | PM2.5 | 0.19880 | 0.15096 | 1.73 | 0.1879 | 1.220 |
|  |  |  |  | Average Packs | 0.69465 | 0.20403 | 11.59 | 0.0007 | 2.003 |
|  |  |  |  | Years Smoked | -0.55770 | 2.26511 | 0.06 | 0.8055 | 0.575 |
|  |  |  |  | Months Quit | -0.00043 | 0.00077 | 0.31 | 0.5782 | 1.000 |
|  |  |  |  | Yrs Smk-x-Age (Yrs) | 0.02896 | 0.09682 | 0.09 | 0.7649 | 1.029 |
|  |  |  |  | Yrs Smk-x-Age Squared | -0.00043 | 0.00137 | 0.10 | 0.7557 | 1.000 |
|  |  |  |  | Yrs Smk-x-Age Cubed | 2.01 e-6 | 6.45 e-6 | 0.10 | 0.7549 | 1.000 |

**Current or Never Smokers**

| **PM** |  | **AIC w/o Cov.** | **AIC w/ Cov.** | **Covariates** | **Est.** | **Std. Err.** | **Χ2** | **P(Χ2)** | **HR** |
| --- | --- | --- | --- | --- | --- | --- | --- | --- | --- |
| **72** | 1. | 8760.95 | 8745.27 | PM2.5 | -0.13378 | 0.12222 | 1.20 | 0.2737 | 0.875 |
|  |  |  |  |  |  |  |  |  |  |
|  | 2. | 8760.95 | 6713.11 | PM2.5 | -0.13707 | 0.12429 | 1.22 | 0.2701 | 0.872 |
|  |  |  |  | Average Packs | 2.99972 | 0.30310 | 97.95 | <0.0001 | 20.080 |
|  |  |  |  | Years Smoked | -0.53789 | 0.96709 | 0.31 | 0.5781 | 0.584 |
|  |  |  |  | Yrs Smk-x-Age (Yrs) | 0.02639 | 0.04189 | 0.40 | 0.5287 | 1.027 |
|  |  |  |  | Yrs Smk-x-Age Squared | -0.00037 | 0.00060 | 0.38 | 0.5372 | 1.000 |
|  |  |  |  | Yrs Smk-x-Age Cubed | 1.65e-6 | 2.85e-6 | 0.34 | 0.5617 | 1.000 |
|  |  |  |  |  |  |  |  |  |  |
| **48** | 1. | 8760.95 | 8744.99 | PM2.5 | -0.14971 | 0.12341 | 1.47 | 0.2251 | 0.861 |
|  |  |  |  |  |  |  |  |  |  |
|  | 2. | 8760.95 | 6712.79 | PM2.5 | -0.15499 | 0.12552 | 1.52 | 0.2169 | 0.856 |
|  |  |  |  | Average Packs | 3.00036 | 0.30310 | 97.99 | <0.0001 | 20.093 |
|  |  |  |  | Years Smoked | -0.53692 | 0.96707 | 0.31 | 0.5788 | 0.585 |
|  |  |  |  | Yrs Smk-x-Age (Yrs) | 0.02635 | 0.04189 | 0.40 | 0.5294 | 1.027 |
|  |  |  |  | Yrs Smk-x-Age Squared | -0.00037 | 0.00060 | 0.38 | 0.5380 | 1.000 |
|  |  |  |  | Yrs Smk-x-Age Cubed | 1.65e-6 | 2.85e-6 | 0.34 | 0.5626 | 1.000 |
|  |  |  |  |  |  |  |  |  |  |
| **24** | 1. | 8760.95 | 8745.19 | PM2.5 | -0.13983 | 0.12360 | 1.28 | 0.2579 | 0.870 |
|  |  |  |  |  |  |  |  |  |  |
|  | 2. | 8760.95 | 6713.08 | PM2.5 | -0.14010 | 0.12585 | 1.24 | 0.2656 | 0.869 |
|  |  |  |  | Average Packs | 2.99943 | 0.30306 | 97.95 | <0.0001 | 20.074 |
|  |  |  |  | Years Smoked | -0.53676 | 0.96704 | 0.31 | 0.5789 | 0.585 |
|  |  |  |  | Yrs Smk-x-Age (Yrs) | 0.02634 | 0.04189 | 0.40 | 0.5294 | 1.027 |
|  |  |  |  | Yrs Smk-x-Age Squared | -0.00037 | 0.00060 | 0.38 | 0.5379 | 1.000 |
|  |  |  |  | Yrs Smk-x-Age Cubed | 1.65e-6 | 2.85e-6 | 0.34 | 0.5625 | 1.000 |

**Section 2: Models using pack-years and different PM2.5 averaging times (with additional variables)**

**Additional covariates included in fully adjusted models:**

- **Median house value in census tract**
- **Median household income in census tract**
- **Body mass index**
- **Overall diet quality**
- **Alcohol consumption**
- **Physical activity**
- **Secondhand smoke from parent in childhood**
- **Secondhand smoke at home**
- **Secondhand smoke at work**
- **Duration of secondhand smoke at home**

**Full Cohort (Current, Never, and Former Smokers)**

| **PM** |  | **AIC w/o Cov.** | **AIC w/ Cov.** | **Covariates** | **Est.** | **Std. Err.** | **Χ2** | **P(Χ2)** | **HR** |
| --- | --- | --- | --- | --- | --- | --- | --- | --- | --- |
| **72** | 1. | 21788.31 | 21073.48 | PM2.5 | 0.06417 | 0.08404 | 0.58 | 0.4451 | 1.066 |
|  |  |  |  |  |  |  |  |  |  |
|  | 2. | 21778.31 | 18494.88 | PM2.5 | 0.05667 | 0.08500 | 0.44 | 0.5050 | 1.058 |
|  |  |  |  | Pack-Years | -0.28488 | 0.47874 | 0.35 | 0.5518 | 0.752 |
|  |  |  |  | Years Smoked | 0.03674 | 0.00213 | 297.55 | <0.0001 | 1.037 |
|  |  |  |  | Months Quit | -0.00004 | 0.00018 | 0.04 | 0.8451 | 1.000 |
|  |  |  |  | Pack-Yr-x-Age (Yrs) | 0.01493 | 0.02076 | 0.52 | 0.4722 | 1.015 |
|  |  |  |  | Pack-Yr-x-Age Squared | -0.00022 | 0.00030 | 0.57 | 0.4496 | 1.000 |
|  |  |  |  | Pack-Yr-x-Age Cubed | 1.07e-6 | 1.42e-6 | 0.57 | 0.4492 | 1.000 |
|  |  |  |  |  |  |  |  |  |  |
| **48** | 1. | 21788.31 | 21073.48 | PM2.5 | 0.05654 | 0.08474 | 0.44 | 0.5046 | 1.058 |
|  |  |  |  |  |  |  |  |  |  |
|  | 2. | 21778.31 | 18495.33 | PM2.5 | 0.04740 | 0.08569 | 0.30 | 0.5802 | 1.049 |
|  |  |  |  | Pack-Years | -0.28418 | 0.47874 | 0.35 | 0.5528 | 0.753 |
|  |  |  |  | Years Smoked | 0.03675 | 0.00213 | 297.65 | <0.0001 | 1.037 |
|  |  |  |  | Months Quit | -0.00004 | 0.00018 | 0.04 | 0.8430 | 1.000 |
|  |  |  |  | Pack-Yr-x-Age (Yrs) | 0.01490 | 0.02076 | 0.51 | 0.4731 | 1.015 |
|  |  |  |  | Pack-Yr-x-Age Squared | -0.00022 | 0.00030 | 0.57 | 0.4505 | 1.000 |
|  |  |  |  | Pack-Yr-x-Age Cubed | 1.07e-6 | 1.42e-6 | 0.57 | 0.4501 | 1.000 |
|  |  |  |  |  |  |  |  |  |  |
| **24** | 1. | 21788.31 | 21073.79 | PM2.5 | 0.04410 | 0.08495 | 0.27 | 0.6037 | 1.045 |
|  |  |  |  |  |  |  |  |  |  |
|  | 2. | 21778.31 | 18495.50 | PM2.5 | 0.03105 | 0.08592 | 0.13 | 0.7178 | 1.032 |
|  |  |  |  | Pack-Years | -0.28352 | 0.47873 | 0.35 | 0.5537 | 0.753 |
|  |  |  |  | Years Smoked | 0.03675 | 0.00213 | 297.78 | <0.0001 | 1.037 |
|  |  |  |  | Months Quit | -0.00004 | 0.00018 | 0.04 | 0.8390 | 1.000 |
|  |  |  |  | Pack-Yr-x-Age (Yrs) | 0.01487 | 0.02076 | 0.51 | 0.4740 | 1.015 |
|  |  |  |  | Pack-Yr-x-Age Squared | -0.00022 | 0.00030 | 0.57 | 0.4515 | 1.000 |
|  |  |  |  | Pack-Yr-x-Age Cubed | 1.07e-6 | 1.42e-6 | 0.57 | 0.4510 | 1.000 |

**Never Smokers**

| **PM** |  | **AIC w/o Cov.** | **AIC w/ Cov.** | **Covariates** | **Est.** | **Std. Err.** | **Χ2** | **P(Χ2)** | **HR** |
| --- | --- | --- | --- | --- | --- | --- | --- | --- | --- |
| **72** | 1. | 1667.02 | 1687.59 | PM2.5 | 0.23889 | 0.26052 | 0.84 | 0.3592 | 1.270 |
|  |  |  |  |  |  |  |  |  |  |
| **48** | 1. | 1667.02 | 1687.75 | PM2.5 | 0.21625 | 0.26250 | 0.68 | 0.4100 | 1.241 |
|  |  |  |  |  |  |  |  |  |  |
| **24** | 1. | 1667.02 | 1687.77 | PM2.5 | 0.21431 | 0.26301 | 0.66 | 0.4152 | 1.239 |

**Never or Former Smokers (Quit for ≥ 10 Years)**

| **PM** |  | **AIC w/o Cov.** | **AIC w/ Cov.** | **Covariates** | **Est.** | **Std. Err.** | **Χ2** | **P(Χ2)** | **HR** |
| --- | --- | --- | --- | --- | --- | --- | --- | --- | --- |
| **72** | 1. | 8768.14 | 8646.85 | PM2.5 | 0.18170 | 0.12970 | 1.96 | 0.1613 | 1.199 |
|  |  |  |  |  |  |  |  |  |  |
|  | 2. | 8768.14 | 7941.52 | PM2.5 | 0.26565 | 0.13110 | 4.10 | 0.0427 | 1.304 |
|  |  |  |  | Pack-Years | -0.58087 | 1.14325 | 0.26 | 0.6114 | 0.559 |
|  |  |  |  | Years Smoked | 0.03065 | 0.00361 | 72.05 | <0.0001 | 1.031 |
|  |  |  |  | Months Quit | -0.00008 | 0.00023 | 0.13 | 0.7159 | 1.000 |
|  |  |  |  | Pack-Yr-x-Age (Yrs) | 0.02603 | 0.04836 | 0.29 | 0.5904 | 1.026 |
|  |  |  |  | Pack-Yr-x-Age Squared | -0.00036 | 0.00068 | 0.28 | 0.5984 | 1.000 |
|  |  |  |  | Pack-Yr-x-Age Cubed | 1.58 e-6 | 3.16 e-6 | 0.25 | 0.6176 | 1.000 |
|  |  |  |  |  |  |  |  |  |  |
| **48** | 1. | 8768.14 | 8647.17 | PM2.5 | 0.16750 | 0.13062 | 1.64 | 0.1997 | 1.182 |
|  |  |  |  |  |  |  |  |  |  |
|  | 2. | 8768.14 | 7941.86 | PM2.5 | 0.25593 | 0.13200 | 3.76 | 0.0525 | 1.292 |
|  |  |  |  | Pack-Years | -0.57732 | 1.14298 | 0.25 | 0.6135 | 0.561 |
|  |  |  |  | Years Smoked | 0.03066 | 0.00361 | 72.10 | <0.0001 | 1.031 |
|  |  |  |  | Months Quit | -0.00008 | 0.00023 | 0.13 | 0.7150 | 1.000 |
|  |  |  |  | Pack-Yr-x-Age (Yrs) | 0.02587 | 0.04835 | 0.29 | 0.5926 | 1.026 |
|  |  |  |  | Pack-Yr-x-Age Squared | -0.00036 | 0.00068 | 0.27 | 0.6007 | 1.000 |
|  |  |  |  | Pack-Yr-x-Age Cubed | 1.57 e-6 | 3.16 e-6 | 0.25 | 0.6199 | 1.000 |
|  |  |  |  |  |  |  |  |  |  |
| **24** | 1. | 8768.14 | 8647.57 | PM2.5 | 0.14610 | 0.13105 | 1.24 | 0.2649 | 1.157 |
|  |  |  |  |  |  |  |  |  |  |
|  | 2. | 8768.14 | 7942.50 | PM2.5 | 0.23385 | 0.13240 | 3.12 | 0.0774 | 1.263 |
|  |  |  |  | Pack-Years | -0.57143 | 1.14262 | 0.25 | 0.6170 | 0.565 |
|  |  |  |  | Years Smoked | 0.03067 | 0.00361 | 72.15 | <0.0001 | 1.031 |
|  |  |  |  | Months Quit | -0.00009 | 0.00023 | 0.14 | 0.7120 | 1.000 |
|  |  |  |  | Pack-Yr-x-Age (Yrs) | 0.02562 | 0.04834 | 0.28 | 0.5960 | 1.026 |
|  |  |  |  | Pack-Yr-x-Age Squared | -0.00035 | 0.00068 | 0.27 | 0.6041 | 1.000 |
|  |  |  |  | Pack-Yr-x-Age Cubed | 1.55 e-6 | 3.16 e-6 | 0.24 | 0.6235 | 1.000 |

**Current or Former Smokers (Quit for < 10 Years)**

| **PM** |  | **AIC w/o Cov.** | **AIC w/ Cov.** | **Covariates** | **Est.** | **Std. Err.** | **Χ2** | **P(Χ2)** | **HR** |
| --- | --- | --- | --- | --- | --- | --- | --- | --- | --- |
| **72** | 1. | 8445.84 | 8386.18 | PM2.5 | -0.10282 | 0.11150 | 0.85 | 0.3564 | 0.902 |
|  |  |  |  |  |  |  |  |  |  |
|  | 2. | 8445.84 | 8009.53 | PM2.5 | -0.06344 | 0.11327 | 0.31 | 0.5754 | 0.939 |
|  |  |  |  | Pack-Years | -0.22435 | 0.88603 | 0.06 | 0.8001 | 0.799 |
|  |  |  |  | Years Smoked | 0.03184 | 0.00695 | 21.01 | <0.0001 | 1.032 |
|  |  |  |  | Months Quit | 0.00104 | 0.00105 | 0.98 | 0.3209 | 1.001 |
|  |  |  |  | Pack-Yr-x-Age (Yrs) | 0.01414 | 0.03873 | 0.13 | 0.7150 | 1.014 |
|  |  |  |  | Pack-Yr-x-Age Squared | -0.00024 | 0.00056 | 0.19 | 0.6655 | 1.000 |
|  |  |  |  | Pack-Yr-x-Age Cubed | 1.29e-6 | 2.69e-6 | 0.23 | 0.6313 | 1.000 |
|  |  |  |  |  |  |  |  |  |  |
| **48** | 1. | 8445.84 | 8386.08 | PM2.5 | -0.10985 | 0.11266 | 0.95 | 0.3295 | 0.896 |
|  |  |  |  |  |  |  |  |  |  |
|  | 2. | 8445.84 | 8009.44 | PM2.5 | -0.07265 | 0.11438 | 0.40 | 0.5253 | 0.930 |
|  |  |  |  | Pack-Years | -0.22463 | 0.88602 | 0.06 | 0.7999 | 0.799 |
|  |  |  |  | Years Smoked | 0.03184 | 0.00695 | 21.01 | <0.0001 | 1.032 |
|  |  |  |  | Months Quit | 0.00104 | 0.00105 | 0.98 | 0.3210 | 1.001 |
|  |  |  |  | Pack-Yr-x-Age (Yrs) | 0.01415 | 0.03873 | 0.13 | 0.7148 | 1.014 |
|  |  |  |  | Pack-Yr-x-Age Squared | -0.00024 | 0.00056 | 0.19 | 0.6653 | 1.000 |
|  |  |  |  | Pack-Yr-x-Age Cubed | 1.29e-6 | 2.69e-6 | 0.23 | 0.6311 | 1.000 |
|  |  |  |  |  |  |  |  |  |  |
| **24** | 1. | 8445.84 | 8386.01 | PM2.5 | -0.11407 | 0.11310 | 1.02 | 0.3132 | 0.892 |
|  |  |  |  |  |  |  |  |  |  |
|  | 2. | 8445.84 | 8009.31 | PM2.5 | -0.08381 | 0.11487 | 0.53 | 0.4556 | 0.920 |
|  |  |  |  | Pack-Years | -0.22413 | 0.88608 | 0.06 | 0.8003 | 0.799 |
|  |  |  |  | Years Smoked | 0.03185 | 0.00695 | 21.02 | <0.0001 | 1.032 |
|  |  |  |  | Months Quit | 0.00104 | 0.00105 | 0.99 | 0.3206 | 1.001 |
|  |  |  |  | Pack-Yr-x-Age (Yrs) | 0.01413 | 0.03873 | 0.13 | 0.7152 | 1.014 |
|  |  |  |  | Pack-Yr-x-Age Squared | -0.00024 | 0.00056 | 0.19 | 0.6657 | 1.000 |
|  |  |  |  | Pack-Yr-x-Age Cubed | 1.29e-6 | 2.69e-6 | 0.23 | 0.6315 | 1.000 |

**Former Smokers Only**

| **PM** |  | **AIC w/o Cov.** | **AIC w/ Cov.** | **Covariates** | **Est.** | **Std. Err.** | **Χ2** | **P(Χ2)** | **HR** |
| --- | --- | --- | --- | --- | --- | --- | --- | --- | --- |
| **72** | 1. | 5837.27 | 5815.26 | PM2.5 | 0.26919 | 0.15074 | 3.19 | 0.0741 | 1.309 |
|  |  |  |  |  |  |  |  |  |  |
|  | 2. | 5837.27 | 5423.36 | PM2.5 | 0.30089 | 0.15286 | 3.87 | 0.0490 | 1.351 |
|  |  |  |  | Pack-Years | -0.63181 | 1.41139 | 0.20 | 0.6544 | 0.532 |
|  |  |  |  | Years Smoked | 0.02097 | 0.00944 | 4.94 | 0.0263 | 1.021 |
|  |  |  |  | Months Quit | -0.00091 | 0.00077 | 1.39 | 0.2386 | 0.999 |
|  |  |  |  | Pack-Yr-x-Age (Yrs) | 0.03024 | 0.05965 | 0.26 | 0.6121 | 1.031 |
|  |  |  |  | Pack-Yr-x-Age Squared | -0.00044 | 0.00084 | 0.28 | 0.5952 | 1.000 |
|  |  |  |  | Pack-Yr-x-Age Cubed | 2.10 e-6 | 3.89e-6 | 0.29 | 0.5882 | 1.000 |
|  |  |  |  |  |  |  |  |  |  |
| **48** | 1. | 5837.27 | 5815.57 | PM2.5 | 0.25726 | 0.15167 | 2.88 | 0.0898 | 1.293 |
|  |  |  |  |  |  |  |  |  |  |
|  | 2. | 5837.27 | 5423.62 | PM2.5 | 0.29230 | 0.15386 | 3.61 | 0.0575 | 1.340 |
|  |  |  |  | Pack-Years | -0.62891 | 1.41094 | 0.20 | 0.6558 | 0.533 |
|  |  |  |  | Years Smoked | 0.02101 | 0.00944 | 4.95 | 0.0261 | 1.021 |
|  |  |  |  | Months Quit | -0.00091 | 0.00077 | 1.38 | 0.2393 | 0.999 |
|  |  |  |  | Pack-Yr-x-Age (Yrs) | 0.03011 | 0.05963 | 0.25 | 0.6135 | 1.031 |
|  |  |  |  | Pack-Yr-x-Age Squared | -0.00044 | 0.00084 | 0.28 | 0.5967 | 1.000 |
|  |  |  |  | Pack-Yr-x-Age Cubed | 2.10 e-6 | 3.89e-6 | 0.29 | 0.5898 | 1.000 |
|  |  |  |  |  |  |  |  |  |  |
| **24** | 1. | 5837.27 | 5816.31 | PM2.5 | 0.22288 | 0.15235 | 2.14 | 0.1435 | 1.250 |
|  |  |  |  |  |  |  |  |  |  |
|  | 2. | 5837.27 | 5424.49 | PM2.5 | 0.25562 | 0.15464 | 2.73 | 0.0983 | 1.291 |
|  |  |  |  | Pack-Years | -0.62056 | 1.41077 | 0.19 | 0.6600 | 0.538 |
|  |  |  |  | Years Smoked | 0.02103 | 0.00944 | 4.96 | 0.0259 | 1.021 |
|  |  |  |  | Months Quit | -0.00091 | 0.00077 | 1.38 | 0.2392 | 0.999 |
|  |  |  |  | Pack-Yr-x-Age (Yrs) | 0.02976 | 0.05962 | 0.25 | 0.6177 | 1.030 |
|  |  |  |  | Pack-Yr-x-Age Squared | -0.00044 | 0.00084 | 0.27 | 0.6009 | 1.000 |
|  |  |  |  | Pack-Yr-x-Age Cubed | 2.07 e-6 | 3.89e-6 | 0.28 | 0.5940 | 1.000 |

**Current or Never Smokers**

| **PM** |  | **AIC w/o Cov.** | **AIC w/ Cov.** | **Covariates** | **Est.** | **Std. Err.** | **Χ2** | **P(Χ2)** | **HR** |
| --- | --- | --- | --- | --- | --- | --- | --- | --- | --- |
| **72** | 1. | 8760.95 | 8159.70 | PM2.5 | -0.07878 | 0.12394 | 0.40 | 0.5250 | 0.924 |
|  |  |  |  |  |  |  |  |  |  |
|  | 2. | 8760.95 | 6642.19 | PM2.5 | -0.11595 | 0.12695 | 0.83 | 0.3610 | 0.891 |
|  |  |  |  | Pack-Years | -0.37806 | 0.64994 | 0.34 | 0.5608 | 0.685 |
|  |  |  |  | Years Smoked | 0.04028 | 0.00284 | 201.00 | <0.0001 | 1.041 |
|  |  |  |  | Pack-Yr-x-Age (Yrs) | 0.01938 | 0.02838 | 0.47 | 0.4947 | 1.020 |
|  |  |  |  | Pack-Yr-x-Age Squared | -0.00030 | 0.00041 | 0.52 | 0.4704 | 1.000 |
|  |  |  |  | Pack-Yr-x-Age Cubed | 1.44e-6 | 1.96e-6 | 0.53 | 0.4645 | 1.000 |
|  |  |  |  |  |  |  |  |  |  |
| **48** | 1. | 8760.95 | 8159.55 | PM2.5 | -0.09360 | 0.12524 | 0.56 | 0.4548 | 0.911 |
|  |  |  |  |  |  |  |  |  |  |
|  | 2. | 8760.95 | 6641.93 | PM2.5 | -0.13421 | 0.12810 | 1.10 | 0.2948 | 0.874 |
|  |  |  |  | Pack-Years | -0.37754 | 0.64995 | 0.34 | 0.5613 | 0.686 |
|  |  |  |  | Years Smoked | 0.04028 | 0.00284 | 201.00 | <0.0001 | 1.041 |
|  |  |  |  | Pack-Yr-x-Age (Yrs) | 0.01935 | 0.02838 | 0.46 | 0.4953 | 1.020 |
|  |  |  |  | Pack-Yr-x-Age Squared | -0.00030 | 0.00041 | 0.52 | 0.4709 | 1.000 |
|  |  |  |  | Pack-Yr-x-Age Cubed | 1.44e-6 | 1.96e-6 | 0.53 | 0.4649 | 1.000 |
|  |  |  |  |  |  |  |  |  |  |
| **24** | 1. | 8760.95 | 8159.70 | PM2.5 | -0.08211 | 0.12550 | 0.43 | 0.5129 | 0.921 |
|  |  |  |  |  |  |  |  |  |  |
|  | 2. | 8760.95 | 6642.13 | PM2.5 | -0.12172 | 0.12839 | 0.90 | 0.3431 | 0.885 |
|  |  |  |  | Pack-Years | -0.37660 | 0.64997 | 0.34 | 0.5623 | 0.686 |
|  |  |  |  | Years Smoked | 0.04027 | 0.00284 | 200.96 | <0.0001 | 1.041 |
|  |  |  |  | Pack-Yr-x-Age (Yrs) | 0.01932 | 0.02838 | 0.46 | 0.4961 | 1.020 |
|  |  |  |  | Pack-Yr-x-Age Squared | -0.00029 | 0.00041 | 0.52 | 0.4717 | 1.000 |
|  |  |  |  | Pack-Yr-x-Age Cubed | 1.43e-6 | 1.96e-6 | 0.53 | 0.4657 | 1.000 |

**Section 3: Models using average packs and different PM2.5 averaging times (total pack-years / years smoked, with additional variables)**

**Additional covariates included in fully adjusted models:**

- **Median house value in census tract**
- **Median household income in census tract**
- **Body mass index**
- **Overall diet quality**
- **Alcohol consumption**
- **Physical activity**
- **Secondhand smoke from parent in childhood**
- **Secondhand smoke at home**
- **Secondhand smoke at work**
- **Duration of secondhand smoke at home**

**Full Cohort (Current, Never, and Former Smokers)**

| **PM** |  | **AIC w/o Cov.** | **AIC w/ Cov.** | **Covariates** | **Est.** | **Std. Err.** | **Χ2** | **P(Χ2)** | **HR** |
| --- | --- | --- | --- | --- | --- | --- | --- | --- | --- |
| **72** | 1. | 21788.31 | 21073.48 | PM2.5 | 0.06417 | 0.08404 | 0.58 | 0.4451 | 1.066 |
|  |  |  |  |  |  |  |  |  |  |
|  | 2. | 21778.31 | 18801.11 | PM2.5 | 0.02268 | 0.08440 | 0.07 | 0.7881 | 1.023 |
|  |  |  |  | Average Packs | 1.09035 | 0.13831 | 62.15 | <0.0001 | 2.975 |
|  |  |  |  | Years Smoked | -0.63612 | 0.77972 | 0.66 | 0.4146 | 0.529 |
|  |  |  |  | Months Quit | -0.00077 | 0.00021 | 13.93 | 0.0002 | 0.999 |
|  |  |  |  | Yrs Smk-x-Age (Yrs) | 0.03145 | 0.03369 | 0.87 | 0.3505 | 1.032 |
|  |  |  |  | Yrs Smk-x-Age Squared | -0.00045 | 0.00048 | 0.87 | 0.3501 | 1.000 |
|  |  |  |  | Yrs Smk-x-Age Cubed | 2.05e-6 | 2.28e-6 | 0.81 | 0.3682 | 1.000 |
|  |  |  |  |  |  |  |  |  |  |
| **48** | 1. | 21788.31 | 21073.62 | PM2.5 | 0.05654 | 0.08474 | 0.44 | 0.5046 | 1.058 |
|  |  |  |  |  |  |  |  |  |  |
|  | 2. | 21778.31 | 18801.16 | PM2.5 | 0.01532 | 0.08512 | 0.03 | 0.8572 | 1.015 |
|  |  |  |  | Average Packs | 1.09029 | 0.13831 | 62.14 | <0.0001 | 2.975 |
|  |  |  |  | Years Smoked | -0.63555 | 0.77973 | 0.66 | 0.4150 | 0.530 |
|  |  |  |  | Months Quit | -0.00077 | 0.00021 | 13.94 | 0.0002 | 0.999 |
|  |  |  |  | Yrs Smk-x-Age (Yrs) | 0.03143 | 0.03369 | 0.87 | 0.3509 | 1.032 |
|  |  |  |  | Yrs Smk-x-Age Squared | -0.00045 | 0.00048 | 0.87 | 0.3501 | 1.000 |
|  |  |  |  | Yrs Smk-x-Age Cubed | 2.05e-6 | 2.28e-6 | 0.81 | 0.3682 | 1.000 |
|  |  |  |  |  |  |  |  |  |  |
| **24** | 1. | 21788.31 | 21073.79 | PM2.5 | 0.04410 | 0.08495 | 0.27 | 0.6037 | 1.045 |
|  |  |  |  |  |  |  |  |  |  |
|  | 2. | 21778.31 | 18801.19 | PM2.5 | 0.00168 | 0.08538 | 0.00 | 0.9843 | 1.002 |
|  |  |  |  | Average Packs | 1.09026 | 0.13832 | 62.13 | <0.0001 | 2.975 |
|  |  |  |  | Years Smoked | -0.63459 | 0.77975 | 0.66 | 0.4157 | 0.530 |
|  |  |  |  | Months Quit | -0.00077 | 0.00021 | 13.97 | 0.0002 | 0.999 |
|  |  |  |  | Yrs Smk-x-Age (Yrs) | 0.03138 | 0.03369 | 0.87 | 0.3516 | 1.032 |
|  |  |  |  | Yrs Smk-x-Age Squared | -0.00045 | 0.00048 | 0.87 | 0.3512 | 1.000 |
|  |  |  |  | Yrs Smk-x-Age Cubed | 2.05e-6 | 2.28e-6 | 0.80 | 0.3694 | 1.000 |

**Never Smokers**

| **PM** |  | **AIC w/o Cov.** | **AIC w/ Cov.** | **Covariates** | **Est.** | **Std. Err.** | **Χ2** | **P(Χ2)** | **HR** |
| --- | --- | --- | --- | --- | --- | --- | --- | --- | --- |
| **72** | 1. | 1667.02 | 1687.59 | PM2.5 | 0.23899 | 0.26052 | 0.84 | 0.3592 | 1.270 |
|  |  |  |  |  |  |  |  |  |  |
| **48** | 1. | 1667.02 | 1687.75 | PM2.5 | 0.21625 | 0.26250 | 0.68 | 0.4100 | 1.241 |
|  |  |  |  |  |  |  |  |  |  |
| **24** | 1. | 1667.02 | 1687.77 | PM2.5 | 0.21431 | 0.26301 | 0.66 | 0.4152 | 1.239 |

**Never or Former Smokers (Quit for ≥ 10 Years)**

| **PM** |  | **AIC w/o Cov.** | **AIC w/ Cov.** | **Covariates** | **Est.** | **Std. Err.** | **Χ2** | **P(Χ2)** | **HR** |
| --- | --- | --- | --- | --- | --- | --- | --- | --- | --- |
| **72** | 1. | 8768.14 | 8646.85 | PM2.5 | 0.18170 | 0.12972 | 1.96 | 0.1613 | 1.199 |
|  |  |  |  |  |  |  |  |  |  |
|  | 2. | 8768.14 | 8064.77 | PM2.5 | 0.22114 | 0.13029 | 2.88 | 0.0896 | 1.247 |
|  |  |  |  | Average Packs | 0.70674 | 0.19443 | 13.21 | 0.0003 | 2.027 |
|  |  |  |  | Years Smoked | -0.56718 | 1.55515 | 0.13 | 0.7153 | 0.567 |
|  |  |  |  | Months Quit | -0.00066 | 0.00028 | 5.64 | 0.0175 | 0.999 |
|  |  |  |  | Yrs Smk-x-Age (Yrs) | 0.02481 | 0.06598 | 0.14 | 0.7069 | 1.025 |
|  |  |  |  | Yrs Smk-x-Age Squared | -0.00031 | 0.00093 | 0.11 | 0.7372 | 1.000 |
|  |  |  |  | Yrs Smk-x-Age Cubed | 1.23e-6 | 4.32e-6 | 0.08 | 0.7766 | 1.000 |
|  |  |  |  |  |  |  |  |  |  |
| **48** | 1. | 8768.14 | 8647.17 | PM2.5 | 0.16750 | 0.13062 | 1.64 | 0.1997 | 1.182 |
|  |  |  |  |  |  |  |  |  |  |
|  | 2. | 8768.14 | 8065.05 | PM2.5 | 0.21146 | 0.13119 | 2.60 | 0.1070 | 1.235 |
|  |  |  |  | Average Packs | 0.70657 | 0.19443 | 13.20 | 0.0003 | 2.027 |
|  |  |  |  | Years Smoked | -0.56639 | 1.55503 | 0.13 | 0.7157 | 0.568 |
|  |  |  |  | Months Quit | -0.00066 | 0.00028 | 5.64 | 0.0175 | 0.999 |
|  |  |  |  | Yrs Smk-x-Age (Yrs) | 0.02477 | 0.06597 | 0.14 | 0.7073 | 1.025 |
|  |  |  |  | Yrs Smk-x-Age Squared | -0.00031 | 0.00093 | 0.11 | 0.7376 | 1.000 |
|  |  |  |  | Yrs Smk-x-Age Cubed | 1.22e-6 | 4.32e-6 | 0.08 | 0.7772 | 1.000 |
|  |  |  |  |  |  |  |  |  |  |
| **24** | 1. | 8768.14 | 8647.57 | PM2.5 | 0.14610 | 0.13105 | 1.24 | 0.2649 | 1.157 |
|  |  |  |  |  |  |  |  |  |  |
|  | 2. | 8768.14 | 8065.55 | PM2.5 | 0.19036 | 0.13154 | 2.09 | 0.1479 | 1.210 |
|  |  |  |  | Average Packs | 0.70619 | 0.19445 | 13.19 | 0.0003 | 2.026 |
|  |  |  |  | Years Smoked | -0.56599 | 1.55482 | 0.13 | 0.7158 | 0.568 |
|  |  |  |  | Months Quit | -0.00066 | 0.00028 | 5.65 | 0.0174 | 0.999 |
|  |  |  |  | Yrs Smk-x-Age (Yrs) | 0.02475 | 0.06597 | 0.14 | 0.7075 | 1.025 |
|  |  |  |  | Yrs Smk-x-Age Squared | -0.00031 | 0.00093 | 0.11 | 0.7378 | 1.000 |
|  |  |  |  | Yrs Smk-x-Age Cubed | 1.22e-6 | 4.32e-6 | 0.08 | 0.7774 | 1.000 |

**Current or Former Smokers (Quit for < 10 Years)**

| **PM** |  | **AIC w/o Cov.** | **AIC w/ Cov.** | **Covariates** | **Est.** | **Std. Err.** | **Χ2** | **P(Χ2)** | **HR** |
| --- | --- | --- | --- | --- | --- | --- | --- | --- | --- |
| **72** | 1. | 8445.84 | 8386.18 | PM2.5 | -0.10282 | 0.11150 | 0.85 | 0.3564 | 0.902 |
|  |  |  |  |  |  |  |  |  |  |
|  | 2. | 8445.84 | 8135.80 | PM2.5 | -0.08562 | 0.11225 | 0.58 | 0.4456 | 0.918 |
|  |  |  |  | Average Packs | 3.81467 | 0.29883 | 162.95 | <0.0001 | 45.362 |
|  |  |  |  | Years Smoked | 0.63731 | 3.12937 | 0.04 | 0.8386 | 1.891 |
|  |  |  |  | Months Quit | 0.00278 | 0.00108 | 6.66 | 0.0098 | 1.003 |
|  |  |  |  | Yrs Smk-x-Age (Yrs) | -0.02174 | 0.13656 | 0.02 | 0.8735 | 0.978 |
|  |  |  |  | Yrs Smk-x-Age Squared | 0.00030 | 0.00197 | 0.02 | 0.8791 | 1.000 |
|  |  |  |  | Yrs Smk-x-Age Cubed | -1.46e-6 | 9.46e-6 | 0.02 | 0.8775 | 1.000 |
|  |  |  |  |  |  |  |  |  |  |
| **48** | 1. | 8445.84 | 8386.18 | PM2.5 | -0.10985 | 0.11266 | 0.95 | 0.3295 | 0.896 |
|  |  |  |  |  |  |  |  |  |  |
|  | 2. | 8445.84 | 8135.69 | PM2.5 | -0.09383 | 0.11339 | 0.68 | 0.4079 | 0.910 |
|  |  |  |  | Average Packs | 3.81484 | 0.29883 | 162.96 | <0.0001 | 45.370 |
|  |  |  |  | Years Smoked | 0.63596 | 3.12967 | 0.04 | 0.8390 | 1.889 |
|  |  |  |  | Months Quit | 0.00278 | 0.00108 | 6.66 | 0.0098 | 1.003 |
|  |  |  |  | Yrs Smk-x-Age (Yrs) | -0.02168 | 0.13657 | 0.02 | 0.8739 | 0.979 |
|  |  |  |  | Yrs Smk-x-Age Squared | 0.00030 | 0.00197 | 0.02 | 0.8795 | 1.000 |
|  |  |  |  | Yrs Smk-x-Age Cubed | -1.45e-6 | 9.46e-6 | 0.02 | 0.8779 | 1.000 |
|  |  |  |  |  |  |  |  |  |  |
| **24** | 1. | 8445.84 | 8386.01 | PM2.5 | -0.11407 | 0.11310 | 1.02 | 0.3132 | 0.892 |
|  |  |  |  |  |  |  |  |  |  |
|  | 2. | 8445.84 | 8135.59 | PM2.5 | -0.10115 | 0.11385 | 0.79 | 0.3743 | 0.904 |
|  |  |  |  | Average Packs | 3.81483 | 0.29882 | 162.98 | <0.0001 | 45.369 |
|  |  |  |  | Years Smoked | 0.63996 | 3.13007 | 0.04 | 0.8380 | 1.896 |
|  |  |  |  | Months Quit | 0.00278 | 0.00108 | 6.66 | 0.0098 | 1.003 |
|  |  |  |  | Yrs Smk-x-Age (Yrs) | -0.02183 | 0.13659 | 0.02 | 0.8730 | 0.978 |
|  |  |  |  | Yrs Smk-x-Age Squared | 0.00030 | 0.00197 | 0.02 | 0.8787 | 1.000 |
|  |  |  |  | Yrs Smk-x-Age Cubed | -1.46e-6 | 9.46e-6 | 0.02 | 0.8772 | 1.000 |

**Former Smokers Only**

| **PM** |  | **AIC w/o Cov.** | **AIC w/ Cov.** | **Covariates** | **Est.** | **Std. Err.** | **Χ2** | **P(Χ2)** | **HR** |
| --- | --- | --- | --- | --- | --- | --- | --- | --- | --- |
| **72** | 1. | 5837.27 | 5815.26 | PM2.5 | 0.26916 | 0.15074 | 3.19 | 0.0741 | 1.309 |
|  |  |  |  |  |  |  |  |  |  |
|  | 2. | 5837.27 | 5550.25 | PM2.5 | 0.24132 | 0.15137 | 2.54 | 0.1109 | 1.273 |
|  |  |  |  | Average Packs | 0.71556 | 0.20607 | 12.06 | 0.0005 | 2.045 |
|  |  |  |  | Years Smoked | -0.60696 | 2.27657 | 0.07 | 0.7898 | 0.545 |
|  |  |  |  | Months Quit | -0.00052 | 0.00077 | 0.45 | 0.5023 | 0.999 |
|  |  |  |  | Yrs Smk-x-Age (Yrs) | 0.03012 | 0.09731 | 0.09 | 0.7569 | 1.031 |
|  |  |  |  | Yrs Smk-x-Age Squared | -0.00043 | 0.00138 | 0.10 | 0.7539 | 1.000 |
|  |  |  |  | Yrs Smk-x-Age Cubed | 1.99 e-6 | 6.48 e-6 | 0.09 | 0.7588 | 1.000 |
|  |  |  |  |  |  |  |  |  |  |
| **48** | 1. | 5837.27 | 5815.58 | PM2.5 | 0.25726 | 0.15167 | 2.88 | 0.0898 | 1.293 |
|  |  |  |  |  |  |  |  |  |  |
|  | 2. | 5837.27 | 5550.45 | PM2.5 | 0.23312 | 0.15239 | 2.34 | 0.1261 | 1.263 |
|  |  |  |  | Average Packs | 0.71543 | 0.20604 | 12.06 | 0.0005 | 2.045 |
|  |  |  |  | Years Smoked | -0.61047 | 2.27634 | 0.07 | 0.7886 | 0.543 |
|  |  |  |  | Months Quit | -0.00052 | 0.00077 | 0.45 | 0.5026 | 0.999 |
|  |  |  |  | Yrs Smk-x-Age (Yrs) | 0.03027 | 0.09730 | 0.10 | 0.7557 | 1.031 |
|  |  |  |  | Yrs Smk-x-Age Squared | -0.00043 | 0.00138 | 0.10 | 0.7528 | 1.000 |
|  |  |  |  | Yrs Smk-x-Age Cubed | 1.99 e-6 | 6.48 e-6 | 0.09 | 0.7577 | 1.000 |
|  |  |  |  |  |  |  |  |  |  |
| **24** | 1. | 5837.27 | 5816.31 | PM2.5 | 0.22288 | 0.15235 | 2.14 | 0.1435 | 1.250 |
|  |  |  |  |  |  |  |  |  |  |
|  | 2. | 5837.27 | 5551.12 | PM2.5 | 0.19760 | 0.15302 | 1.67 | 0.1966 | 1.218 |
|  |  |  |  | Average Packs | 0.71517 | 0.20602 | 12.05 | 0.0005 | 2.045 |
|  |  |  |  | Years Smoked | -0.61482 | 2.27686 | 0.07 | 0.7871 | 0.541 |
|  |  |  |  | Months Quit | -0.00052 | 0.00077 | 0.45 | 0.5014 | 0.999 |
|  |  |  |  | Yrs Smk-x-Age (Yrs) | 0.03044 | 0.09732 | 0.10 | 0.7545 | 1.031 |
|  |  |  |  | Yrs Smk-x-Age Squared | -0.00044 | 0.00138 | 0.10 | 0.7517 | 1.000 |
|  |  |  |  | Yrs Smk-x-Age Cubed | 2.00 e-6 | 6.48 e-6 | 0.10 | 0.7567 | 1.000 |

**Current or Never Smokers**

| **PM** |  | **AIC w/o Cov.** | **AIC w/ Cov.** | **Covariates** | **Est.** | **Std. Err.** | **Χ2** | **P(Χ2)** | **HR** |
| --- | --- | --- | --- | --- | --- | --- | --- | --- | --- |
| **72** | 1. | 8760.95 | 8159.70 | PM2.5 | -0.07878 | 0.12394 | 0.40 | 0.5250 | 0.924 |
|  |  |  |  |  |  |  |  |  |  |
|  | 2. | 8760.95 | 6723.17 | PM2.5 | -0.13658 | 0.12581 | 1.18 | 0.2776 | 0.872 |
|  |  |  |  | Average Packs | 3.01173 | 0.30740 | 95.99 | <0.0001 | 20.322 |
|  |  |  |  | Years Smoked | -0.51884 | 0.96816 | 0.29 | 0.5920 | 0.595 |
|  |  |  |  | Yrs Smk-x-Age (Yrs) | 0.02537 | 0.04194 | 0.36 | 0.5453 | 1.026 |
|  |  |  |  | Yrs Smk-x-Age Squared | -0.00035 | 0.00060 | 0.35 | 0.5539 | 1.000 |
|  |  |  |  | Yrs Smk-x-Age Cubed | 1.56e-6 | 2.85e-6 | 0.31 | 0.5779 | 1.000 |
|  |  |  |  |  |  |  |  |  |  |
| **48** | 1. | 8760.95 | 8159.55 | PM2.5 | -0.09360 | 0.12524 | 0.56 | 0.4548 | 0.911 |
|  |  |  |  |  |  |  |  |  |  |
|  | 2. | 8760.95 | 6722.86 | PM2.5 | -0.15489 | 0.12714 | 1.48 | 0.2231 | 0.857 |
|  |  |  |  | Average Packs | 3.01256 | 0.30740 | 96.04 | <0.0001 | 20.339 |
|  |  |  |  | Years Smoked | -0.51790 | 0.96812 | 0.29 | 0.5927 | 0.596 |
|  |  |  |  | Yrs Smk-x-Age (Yrs) | 0.02533 | 0.04194 | 0.36 | 0.5459 | 1.026 |
|  |  |  |  | Yrs Smk-x-Age Squared | -0.00035 | 0.00060 | 0.35 | 0.5546 | 1.000 |
|  |  |  |  | Yrs Smk-x-Age Cubed | 1.58e-6 | 2.85e-6 | 0.31 | 0.5786 | 1.000 |
|  |  |  |  |  |  |  |  |  |  |
| **24** | 1. | 8760.95 | 8159.68 | PM2.5 | -0.08211 | 0.12550 | 0.43 | 0.5129 | 0.921 |
|  |  |  |  |  |  |  |  |  |  |
|  | 2. | 8760.95 | 6723.12 | PM2.5 | -0.14115 | 0.12746 | 1.23 | 0.2681 | 0.868 |
|  |  |  |  | Average Packs | 3.01175 | 0.30736 | 96.02 | <0.0001 | 20.323 |
|  |  |  |  | Years Smoked | -0.51782 | 0.96808 | 0.29 | 0.5927 | 0.595 |
|  |  |  |  | Yrs Smk-x-Age (Yrs) | 0.02533 | 0.04194 | 0.36 | 0.5459 | 1.026 |
|  |  |  |  | Yrs Smk-x-Age Squared | -0.00035 | 0.00060 | 0.35 | 0.5546 | 1.000 |
|  |  |  |  | Yrs Smk-x-Age Cubed | 1.58e-6 | 2.85e-6 | 0.31 | 0.5786 | 1.000 |

**Section 4: Models using different baseline age stratifications**

**Section 4.1. Minimally adjusted models**

1. **Age in months and cycle (default) – 503 levels of age in months**
2. **Age in single years and cycle – 42 levels of age in years, from 48 to 89**
3. **Age in 5-year intervals and cycle – 9 levels of 5-year age groups**
4. **Age in 10-year intervals and cycle - 5 levels of 10-year age groups**

97,303 subjects, 721,177 subject-cycle records, 1,990 events (0.3%), 1,402,988.7 person-years of follow-up (records with unknown pack-years deleted).

|  | **AIC w/o Cov.** | **AIC w/ Cov.** | **Covariates** | **HR** | **HR Lower** | **HR Upper** | **p-values** |
| --- | --- | --- | --- | --- | --- | --- | --- |
| 1. | 21788.88 | 18861.24 | PM2.5 | 1.079 | 0.9145 | 1.2738 | 0.3666 |
|  |  |  | Pack-Years | 0.749 | 0.3223 | 1.7385 | 0.5005 |
|  |  |  | Pack-Yr-x-Age (Yrs) | 1.017 | 0.9806 | 1.0549 | 0.3641 |
|  |  |  | Pack-Yr-x-Age Squared | 1.000 | 0.9992 | 1.0002 | 0.3133 |
|  |  |  | Pack-Yr-x-Age Cubed | 1.000 | 1.0000 | 1.0000 | 0.2837 |
|  |  |  |  |  |  |  |  |
| 2. | 31651.01 | 28718.65 | PM2.5 | 1.102 | 0.9354 | 1.2980 | 0.2457 |
|  |  |  | Pack-Years | 0.725 | 0.3271 | 1.6064 | 0.4281 |
|  |  |  | Pack-Yr-x-Age (Yrs) | 1.018 | 0.9836 | 1.0538 | 0.3065 |
|  |  |  | Pack-Yr-x-Age Squared | 1.000 | 0.9992 | 1.0002 | 0.2648 |
|  |  |  | Pack-Yr-x-Age Cubed | 1.000 | 1.0000 | 1.0000 | 0.2481 |
|  |  |  |  |  |  |  |  |
| 3. | 37858.95 | 34923.77 | PM2.5 | 1.094 | 0.9287 | 1.2886 | 0.2824 |
|  |  |  | Pack-Years | 0.762 | 0.3737 | 1.5538 | 0.4546 |
|  |  |  | Pack-Yr-x-Age (Yrs) | 1.015 | 0.9846 | 1.0473 | 0.3290 |
|  |  |  | Pack-Yr-x-Age Squared | 1.000 | 0.9993 | 1.0002 | 0.2901 |
|  |  |  | Pack-Yr-x-Age Cubed | 1.000 | 1.0000 | 1.0000 | 0.2694 |
|  |  |  |  |  |  |  |  |
| 4. | 40220.35 | 37264.86 | PM2.5 | 1.096 | 0.9304 | 1.2911 | 0.2727 |
|  |  |  | Pack-Years | 0.853 | 0.4619 | 1.5750 | 0.6112 |
|  |  |  | Pack-Yr-x-Age (Yrs) | 1.009 | 0.9826 | 1.0362 | 0.5072 |
|  |  |  | Pack-Yr-x-Age Squared | 1.000 | 0.9995 | 1.0003 | 0.5048 |
|  |  |  | Pack-Yr-x-Age Cubed | 1.000 | 1.0000 | 1.0000 | 0.5169 |

**Section 4.2. Fully adjusted models**

1. **Age in months and cycle (default) – 503 levels of age in months**
2. **Age in single years and cycle – 42 levels of age in years, from 48 to 89**
3. **Age in 5-year intervals and cycle – 9 levels of 5-year age groups**
4. **Age in 10-year intervals and cycle - 5 levels of 10-year age groups**

97,303 subjects, 721,177 subject-cycle records, 1,990 events (0.3%), 1,402,988.7 person-years of follow-up (records with unknown pack-years deleted).

**Additional covariates included in fully adjusted models:**

- **Median house value in census tract**
- **Median household income in census tract**
- **Body mass index**
- **Overall diet quality**
- **Alcohol consumption**
- **Physical activity**
- **Secondhand smoke from parent in childhood**
- **Secondhand smoke at home**
- **Secondhand smoke at work**
- **Duration of secondhand smoke at home**

|  | **AIC w/o Cov.** | **AIC w/ Cov.** | **Covariates** | **HR** | **HR Lower** | **HR Upper** | **p-values** |
| --- | --- | --- | --- | --- | --- | --- | --- |
| 1. | 21788.88 | 18861.24 | PM2.5 | 1.079 | 0.9145 | 1.2738 | 0.3666 |
|  |  |  | Pack-Years | 0.749 | 0.3223 | 1.7385 | 0.5005 |
|  |  |  | Pack-Yr-x-Age (Yrs) | 1.017 | 0.9806 | 1.0549 | 0.3641 |
|  |  |  | Pack-Yr-x-Age Squared | 1.000 | 0.9992 | 1.0002 | 0.3133 |
|  |  |  | Pack-Yr-x-Age Cubed | 1.000 | 1.0000 | 1.0000 | 0.2837 |
|  |  |  |  |  |  |  |  |
| 2. | 31651.01 | 28718.65 | PM2.5 | 1.102 | 0.9354 | 1.2980 | 0.2457 |
|  |  |  | Pack-Years | 0.725 | 0.3271 | 1.6064 | 0.4281 |
|  |  |  | Pack-Yr-x-Age (Yrs) | 1.018 | 0.9836 | 1.0538 | 0.3065 |
|  |  |  | Pack-Yr-x-Age Squared | 1.000 | 0.9992 | 1.0002 | 0.2648 |
|  |  |  | Pack-Yr-x-Age Cubed | 1.000 | 1.0000 | 1.0000 | 0.2481 |
|  |  |  |  |  |  |  |  |
| 3. | 37858.95 | 34923.77 | PM2.5 | 1.094 | 0.9287 | 1.2886 | 0.2824 |
|  |  |  | Pack-Years | 0.762 | 0.3737 | 1.5538 | 0.4546 |
|  |  |  | Pack-Yr-x-Age (Yrs) | 1.015 | 0.9846 | 1.0473 | 0.3290 |
|  |  |  | Pack-Yr-x-Age Squared | 1.000 | 0.9993 | 1.0002 | 0.2901 |
|  |  |  | Pack-Yr-x-Age Cubed | 1.000 | 1.0000 | 1.0000 | 0.2694 |
|  |  |  |  |  |  |  |  |
| 4. | 40220.35 | 37264.86 | PM2.5 | 1.096 | 0.9304 | 1.2911 | 0.2727 |
|  |  |  | Pack-Years | 0.853 | 0.4619 | 1.5750 | 0.6112 |
|  |  |  | Pack-Yr-x-Age (Yrs) | 1.009 | 0.9826 | 1.0362 | 0.5072 |
|  |  |  | Pack-Yr-x-Age Squared | 1.000 | 0.9995 | 1.0003 | 0.5048 |
|  |  |  | Pack-Yr-x-Age Cubed | 1.000 | 1.0000 | 1.0000 | 0.5169 |

**Section 5: Models using different PM size fractions**

**Section 5.1: PM10**

**Full Cohort, Based on Pack-Years of Smoking**

97,303 subjects, 721,127 subject-cycle records, 1,992 events (0.3%), 1,402,829.1 person-years of follow-up (records with unknown pack-years, unknown years of smoking, or unknown time since quitting deleted). **Each model includes stratification by age-month and cycle, also with region as a covariate.**

|  | **AIC w/o Cov.** | **AIC w/ Cov.** | **Covariates** | **Est.** | **Std. Err.** | **Χ2** | **P(Χ2)** | **HR** |
| --- | --- | --- | --- | --- | --- | --- | --- | --- |
| 1. | 21810.08 | 21795.29 | PM10 | 0.04394 | 0.04594 | 0.91 | 0.3389 | 1.045 |
|  |  |  |  |  |  |  |  |  |
| 2. | 21810.08 | 19734.36 | PM10 | 0.04292 | 0.04644 | 0.85 | 0.3553 | 1.044 |
|  |  |  | Current v Never | 3.25414 | 0.08446 | 1484.58 | <0.0001 | 25.897 |
|  |  |  | Former v Never | 1.86354 | 0.08077 | 532.36 | <0.0001 | 6.447 |
|  |  |  |  |  |  |  |  |  |
| 3. | 21810.08 | 18721.45 | PM10 | 0.03349 | 0.04661 | 0.51 | 0.4725 | 1.034 |
|  |  |  | Current v Never | 1.40518 | 0.10476 | 179.90 | <0.0001 | 4.076 |
|  |  |  | Former v Never | 0.96338 | 0.08774 | 120.56 | <0.0001 | 2.621 |
|  |  |  | Pack-Years | 0.03113 | 0.00092 | 1143.02 | <0.0001 | 1.032 |
|  |  |  |  |  |  |  |  |  |
| 4. | 21810.08 | 18550.36 | PM10 | 0.02325 | 0.04663 | 0.25 | 0.6180 | 1.024 |
|  |  |  | Current v Never | 0.18475 | 0.14328 | 1.66 | 0.1972 | 1.203 |
|  |  |  | Former v Never | 0.13154 | 0.11343 | 1.34 | 0.2462 | 1.141 |
|  |  |  | Pack-Years | 0.02219 | 0.00114 | 375.64 | <0.0001 | 1.022 |
|  |  |  | Years Smoked | 0.03594 | 0.00277 | 168.27 | <0.0001 | 1.037 |
|  |  |  |  |  |  |  |  |  |
| 5. | 21810.08 | 18545.54 | PM10 | 0.02228 | 0.04662 | 0.23 | 0.6372 | 1.023 |
|  |  |  | Current v Never | 0.72061 | 0.24606 | 8.58 | 0.0034 | 2.056 |
|  |  |  | Former v Never | 0.70822 | 0.24415 | 8.41 | 0.0037 | 2.030 |
|  |  |  | Pack-Years | 0.02240 | 0.00115 | 380.25 | <0.0001 | 1.023 |
|  |  |  | Years Smoked | 0.02508 | 0.00490 | 26.17 | <0.0001 | 1.025 |
|  |  |  | Months Quit | -0.00111 | 0.00042 | 7.01 | 0.0081 | 0.999 |
|  |  |  |  |  |  |  |  |  |
| 6. | 21810.08 | 18549.92 | PM10 | 0.02226 | 0.04663 | 0.23 | 0.6332 | 1.023 |
|  |  |  | Pack-Years | 0.02213 | 0.00114 | 377.19 | <0.0001 | 1.022 |
|  |  |  | Years Smoked | 0.03823 | 0.00208 | 337.35 | <0.0001 | 1.039 |
|  |  |  | Months Quit | -0.00006 | 0.00018 | 0.11 | 0.7440 | 1.000 |
|  |  |  |  |  |  |  |  |  |
| 7A. | 21810.08 | 18509.62 | PM10 | 0.02149 | 0.04660 | 0.21 | 0.6446 | 1.022 |
|  |  |  | Pack-Years | 0.07576 | 0.00832 | 82.95 | <0.0001 | 1.079 |
|  |  |  | Years Smoked | 0.03852 | 0.00207 | 346.712 | <0.0001 | 1.039 |
|  |  |  | Months Quit | -0.00005 | 0.00018 | 0.07 | 0.7867 | 1.000 |
|  |  |  | Pack-Yr-x-Age (Yrs) | -0.00075 | 0.00011 | 41.90 | <0.0001 | 0.999 |
|  |  |  |  |  |  |  |  |  |
| 7B. | 21810.08 | 18511.62 | PM10 | 0.02152 | 0.04660 | 0.21 | 0.6442 | 1.022 |
|  |  |  | Pack-Years | 0.08025 | 0.06737 | 1.42 | 0.2336 | 1.084 |
|  |  |  | Years Smoked | 0.03851 | 0.00208 | 344.31 | <0.0001 | 1.039 |
|  |  |  | Months Quit | -0.00005 | 0.00018 | 0.07 | 0.7853 | 1.000 |
|  |  |  | Pack-Yr-x-Age (Yrs) | -0.00087 | 0.00191 | 0.21 | 0.6471 | 0.999 |
|  |  |  | Pack-Yr-x-Age Squared | 9.04 e-7 | 0.00003 | 0.01 | 0.9465 | 1.000 |
|  |  |  |  |  |  |  |  |  |
| 7C. | 21810.08 | 18512.98 | PM10 | 0.02173 | 0.04659 | 0.22 | 0.6410 | 1.022 |
|  |  |  | Pack-Years | -0.29529 | 0.47783 | 0.38 | 0.5366 | 0.744 |
|  |  |  | Years Smoked | 0.03848 | 0.00208 | 343.78 | <0.0001 | 1.039 |
|  |  |  | Months Quit | -0.00005 | 0.00018 | 0.08 | 0.7806 | 1.000 |
|  |  |  | Pack-Yr-x-Age (Yrs) | 0.01552 | 0.02073 | 0.56 | 0.4542 | 1.016 |
|  |  |  | Pack-Yr-x-Age Squared | -0.00023 | 0.00030 | 0.62 | 0.4293 | 1.000 |
|  |  |  | Pack-Yr-x-Age Cubed | 1.13e-6 | 1.42e-6 | 0.63 | 0.4270 | 1.000 |
|  |  |  |  |  |  |  |  |  |
| 8. | 21810.08 | 18878.82 | PM10 | 0.03340 | 0.04658 | 0.51 | 0.4734 | 1.034 |
|  |  |  | Pack-Years | -0.28394 | 0.42972 | 0.44 | 0.5087 | 0.753 |
|  |  |  | Pack-Yr-x-Age (Yrs) | 0.01666 | 0.01862 | 0.80 | 0.3707 | 1.017 |
|  |  |  | Pack-Yr-x-Age Squared | -0.00027 | 0.00027 | 0.99 | 0.3192 | 1.000 |
|  |  |  | Pack-Yr-x-Age Cubed | 1.35e-6 | 1.27e-6 | 1.12 | 0.2894 | 1.000 |

**Never Smokers**

44,245 subjects, 337,374 subject-cycle records, 179 events (0.1%), 659,099.5 person-years of follow-up.

**Each model includes stratification by age-month and cycle, also with region as a covariate.**

|  | **AIC w/o Cov.** | **AIC w/ Cov.** | **Covariates** | **Est.** | **Std. Err.** | **Χ2** | **P(Χ2)** | **HR** |
| --- | --- | --- | --- | --- | --- | --- | --- | --- |
| 1. | 1667.02 | 1667.85 | PM10 | 0.10250 | 0.13822 | 0.55 | 0.4583 | 1.108 |
|  |  |  |  |  |  |  |  |  |

**Never or Former Smokers (Quit for ≥ 10 Years), Based on Pack-Years of Smoking**

83,819 subjects, 596,454 subject-cycle records, 833 events (0.1%), 1,161,499.3 person-years of follow-up (records with unknown time since quitting deleted). **Each model includes stratification by age-month and cycle, also with region as a covariate.**

|  | **AIC w/o Cov.** | **AIC w/ Cov.** | **Covariates** | **Est.** | **Std. Err.** | **Χ2** | **P(Χ2)** | **HR** |
| --- | --- | --- | --- | --- | --- | --- | --- | --- |
| 1. | 8778.12 | 8777.60 | PM10 | 0.09265 | 0.07044 | 1.73 | 0.1884 | 1.097 |
|  |  |  |  |  |  |  |  |  |
| 2. | 8778.12 | 8380.45 | PM10 | 0.13065 | 0.07092 | 3.39 | 0.0654 | 1.140 |
|  |  |  | Former v Never | 1.51921 | 0.08476 | 321.23 | <0.0001 | 4.569 |
|  |  |  |  |  |  |  |  |  |
| 3. | 8778.12 | 7986.66 | PM10 | 0.13513 | 0.07153 | 3.57 | 0.0589 | 1.145 |
|  |  |  | Former v Never | 0.61455 | 0.10082 | 37.15 | <0.0001 | 1.849 |
|  |  |  | Pack-Years | 0.03607 | 0.00166 | 473.09 | <0.0001 | 1.037 |
|  |  |  |  |  |  |  |  |  |
| 4. | 8778.12 | 7943.96 | PM10 | 0.12770 | 0.07159 | 3.18 | 0.0745 | 1.136 |
|  |  |  | Former v Never | 0.08895 | 0.13299 | 0.45 | 0.5036 | 1.093 |
|  |  |  | Pack-Years | 0.02624 | 0.00222 | 139.29 | <0.0001 | 1.027 |
|  |  |  | Years Smoked | 0.03051 | 0.00455 | 45.00 | <0.0001 | 1.031 |
|  |  |  |  |  |  |  |  |  |
| 5A. | 8778.12 | 7943.96 | PM10 | 0.12714 | 0.07157 | 3.16 | 0.0757 | 1.136 |
|  |  |  | Former v Never | 0.79394 | 0.37027 | 4.60 | 0.0320 | 2.212 |
|  |  |  | Pack-Years | 0.02645 | 0.00223 | 140.73 | <0.0001 | 1.027 |
|  |  |  | Years Smoked | 0.01794 | 0.00764 | 5.52 | 0.0188 | 1.018 |
|  |  |  | Months Quit | -0.00127 | 0.00063 | 4.10 | 0.0428 | 0.999 |
|  |  |  |  |  |  |  |  |  |
| 5B. | 8778.12 | 7939.27 | PM10 | 0.12514 | 0.07154 | 3.06 | 0.0802 | 1.133 |
|  |  |  | Former v Never | 0.51641 | 0.40047 | 1.66 | 0.1972 | 1.676 |
|  |  |  | Pack-Years | -0.62394 | 1.15209 | 0.29 | 0.5881 | 0.536 |
|  |  |  | Years Smoked | 0.02293 | 0.00807 | 8.08 | 0.0045 | 1.023 |
|  |  |  | Months Quit | -0.00083 | 0.00066 | 1.59 | 0.2077 | 0.999 |
|  |  |  | Pack-Yr-x-Age (Yrs) | 0.02766 | 0.04869 | 0.32 | 0.5700 | 1.028 |
|  |  |  | Pack-Yr-x-Age Squared | -0.00038 | 0.00068 | 0.31 | 0.5791 | 1.000 |
|  |  |  | Pack-Yr-x-Age Cubed | 1.67e-6 | 3.17e-6 | 0.28 | 0.5981 | 1.000 |
|  |  |  |  |  |  |  |  |  |
| 6. | 8778.12 | 7944.41 | PM10 | 0.12649 | 0.07160 | 3.12 | 0.0773 | 1.135 |
|  |  |  | Pack-Years | 0.02612 | 0.00222 | 138.60 | <0.0001 | 1.026 |
|  |  |  | Years Smoked | 0.03250 | 0.00352 | 85.14 | <0.0001 | 1.033 |
|  |  |  | Months Quit | -0.00002 | 0.00022 | 0.01 | 0.9466 | 1.000 |
|  |  |  |  |  |  |  |  |  |
| 7A. | 8778.12 | 7935.36 | PM10 | 0.12454 | 0.07154 | 3.03 | 0.0817 | 1.133 |
|  |  |  | Pack-Years | 0.08530 | 0.01771 | 23.20 | <0.0001 | 1.089 |
|  |  |  | Years Smoked | 0.03221 | 0.00351 | 84.07 | <0.0001 | 1.033 |
|  |  |  | Months Quit | -0.00004 | 0.00022 | 0.03 | 0.8668 | 1.000 |
|  |  |  | Pack-Yr-x-Age (Yrs) | -0.00079 | 0.00024 | 11.22 | 0.0008 | 0.999 |
|  |  |  |  |  |  |  |  |  |
| 7B. | 8778.12 | 7937.06 | PM10 | 0.12417 | 0.07155 | 3.01 | 0.0827 | 1.132 |
|  |  |  | Pack-Years | 0.00023 | 0.15638 | 0.00 | 0.9988 | 1.000 |
|  |  |  | Years Smoked | 0.03232 | 0.00352 | 84.38 | <0.0001 | 1.033 |
|  |  |  | Months Quit | -0.00003 | 0.00022 | 0.02 | 0.8840 | 1.000 |
|  |  |  | Pack-Yr-x-Age (Yrs) | 0.00156 | 0.00431 | 0.13 | 0.7167 | 1.002 |
|  |  |  | Pack-Yr-x-Age Squared | -0.00002 | 0.00003 | 0.30 | 0.5873 | 1.000 |
|  |  |  |  |  |  |  |  |  |
| 7C. | 8778.12 | 7938.88 | PM10 | 0.12452 | 0.07155 | 3.03 | 0.0818 | 1.133 |
|  |  |  | Pack-Years | -0.46640 | 1.13691 | 0.17 | 0.6816 | 0.627 |
|  |  |  | Years Smoked | 0.03229 | 0.00352 | 84.22 | <0.0001 | 1.033 |
|  |  |  | Months Quit | -0.00003 | 0.00022 | 0.02 | 0.8865 | 1.000 |
|  |  |  | Pack-Yr-x-Age (Yrs) | 0.02144 | 0.04812 | 0.20 | 0.6559 | 1.022 |
|  |  |  | Pack-Yr-x-Age Squared | -0.00029 | 0.00067 | 0.19 | 0.6609 | 1.000 |
|  |  |  | Pack-Yr-x-Age Cubed | 1.31e-6 | 3.14e-6 | 0.17 | 0.6778 | 1.000 |
|  |  |  |  |  |  |  |  |  |
| 8. | 8778.12 | 8016.26 | PM10 | 0.12529 | 0.07151 | 3.07 | 0.0798 | 1.133 |
|  |  |  | Pack-Years | -0.47902 | 1.06340 | 0.20 | 0.6524 | 0.619 |
|  |  |  | Pack-Yr-x-Age (Yrs) | 0.02389 | 0.04494 | 0.28 | 0.5950 | 1.024 |
|  |  |  | Pack-Yr-x-Age Squared | -0.00035 | 0.00063 | 0.30 | 0.5810 | 1.000 |
|  |  |  | Pack-Yr-x-Age Cubed | 1.62e-6 | 2.93e-6 | 0.31 | 0.5798 | 1.000 |

**Current or Former Smokers (Quit for < 10 Years), Based on Pack-Years of Smoking**

25,767 subjects, 124,673 subject-cycle records, 1,159 events (0.9%), 241,329.8 person-years of follow-up (records with unknown pack-years, unknown years of smoking, or unknown time since quitting deleted). **Each model includes stratification by age-month and cycle, also with region as a covariate.**

|  | **AIC w/o Cov.** | **AIC w/ Cov.** | **Covariates** | **Est.** | **Std. Err.** | **Χ2** | **P(Χ2)** | **HR** |
| --- | --- | --- | --- | --- | --- | --- | --- | --- |
| 1. | 8454.28 | 8449.94 | PM10 | -0.04259 | 0.06203 | 0.47 | 0.4923 | 0.958 |
|  |  |  |  |  |  |  |  |  |
| 2. | 8454.28 | 8396.61 | PM10 | -0.04478 | 0.06206 | 0.52 | 0.4706 | 0.956 |
|  |  |  | Current v Former | 0.45298 | 0.06170 | 53.90 | <0.0001 | 1.573 |
|  |  |  |  |  |  |  |  |  |
| 3. | 8454.28 | 8051.37 | PM10 | -0.03877 | 0.06254 | 0.38 | 0.5353 | 0.962 |
|  |  |  | Current v Former | 0.18798 | 0.06368 | 8.71 | 0.0032 | 1.207 |
|  |  |  | Pack-Years | 0.02382 | 0.00126 | 360.20 | <0.0001 | 1.024 |
|  |  |  |  |  |  |  |  |  |
| 4. | 8454.28 | 8024.72 | PM10 | -0.03908 | 0.06254 | 0.39 | 0.5321 | 0.962 |
|  |  |  | Current v Former | 0.03252 | 0.07032 | 0.21 | 0.6437 | 1.033 |
|  |  |  | Pack-Years | 0.02087 | 0.00137 | 230.89 | <0.0001 | 1.021 |
|  |  |  | Years Smoked | 0.03312 | 0.00652 | 25.82 | <0.0001 | 1.034 |
|  |  |  |  |  |  |  |  |  |
| 5A. | 8454.28 | 8026.17 | PM10 | -0.03938 | 0.06254 | 0.40 | 0.5289 | 0.961 |
|  |  |  | Current v Former | 0.08738 | 0.10316 | 0.72 | 0.3970 | 1.091 |
|  |  |  | Pack-Years | 0.02085 | 0.00137 | 230.10 | <0.0001 | 1.021 |
|  |  |  | Years Smoked | 0.03480 | 0.00695 | 25.08 | <0.0001 | 1.035 |
|  |  |  | Months Quit | 0.00111 | 0.00151 | 0.54 | 0.4611 | 1.001 |
|  |  |  |  |  |  |  |  |  |
| 5B. | 8454.28 | 8016.86 | PM10 | -0.04011 | 0.06243 | 0.41 | 0.5207 | 0.961 |
|  |  |  | Current v Former | 0.08714 | 0.10306 | 0.71 | 0.3978 | 1.091 |
|  |  |  | Pack-Years | -0.32921 | 0.88518 | 0.14 | 0.7100 | 0.719 |
|  |  |  | Years Smoked | 0.03337 | 0.00691 | 23.33 | <0.0001 | 1.034 |
|  |  |  | Months Quit | 0.00111 | 0.00150 | 0.55 | 0.4591 | 1.001 |
|  |  |  | Pack-Yr-x-Age (Yrs) | 0.01892 | 0.03871 | 0.24 | 0.6251 | 1.019 |
|  |  |  | Pack-Yr-x-Age Squared | -0.00031 | 0.00056 | 0.31 | 0.5761 | 1.000 |
|  |  |  | Pack-Yr-x-Age Cubed | 1.63e-6 | 2.69e-6 | 0.37 | 0.5428 | 1.000 |
|  |  |  |  |  |  |  |  |  |
| 6. | 8454.28 | 8024.90 | PM10 | -0.03882 | 0.06254 | 0.38 | 0.5348 | 0.962 |
|  |  |  | Pack-Years | 0.02089 | 0.00137 | 231.44 | <0.0001 | 1.021 |
|  |  |  | Years Smoked | 0.03507 | 0.00694 | 25.51 | <0.0001 | 1.036 |
|  |  |  | Months Quit | 0.00018 | 0.00104 | 0.03 | 0.8619 | 1.000 |
|  |  |  |  |  |  |  |  |  |
| 7A. | 8454.28 | 8013.29 | PM10 | -0.03980 | 0.06243 | 0.41 | 0.5238 | 0.961 |
|  |  |  | Pack-Years | 0.07228 | 0.01397 | 26.78 | <0.0001 | 1.075 |
|  |  |  | Years Smoked | 0.03402 | 0.00689 | 24.39 | <0.0001 | 1.035 |
|  |  |  | Months Quit | 0.00022 | 0.00103 | 0.04 | 0.8329 | 1.000 |
|  |  |  | Pack-Yr-x-Age (Yrs) | -0.00072 | 0.00020 | 13.64 | 0.0002 | 0.999 |
|  |  |  |  |  |  |  |  |  |
| 7B. | 8454.28 | 8013.94 | PM10 | -0.03924 | 0.06243 | 0.39 | 0.5297 | 0.962 |
|  |  |  | Pack-Years | 0.20548 | 0.11526 | 3.18 | 0.0746 | 1.228 |
|  |  |  | Years Smoked | 0.03367 | 0.00690 | 23.81 | <0.0001 | 1.034 |
|  |  |  | Months Quit | 0.00019 | 0.00103 | 0.03 | 0.8503 | 1.000 |
|  |  |  | Pack-Yr-x-Age (Yrs) | -0.00457 | 0.00331 | 1.91 | 0.1674 | 0.995 |
|  |  |  | Pack-Yr-x-Age Squared | 0.00003 | 0.00002 | 1.35 | 0.2444 | 1.000 |
|  |  |  |  |  |  |  |  |  |
| 7C. | 8454.28 | 8013.94 | PM10 | -0.03962 | 0.06242 | 0.40 | 0.5256 | 0.961 |
|  |  |  | Pack-Years | -0.31799 | 0.88503 | 0.13 | 0.7194 | 0.728 |
|  |  |  | Years Smoked | 0.03364 | 0.00690 | 23.74 | <0.0001 | 1.034 |
|  |  |  | Months Quit | 0.00019 | 0.00103 | 0.03 | 0.8572 | 1.000 |
|  |  |  | Pack-Yr-x-Age (Yrs) | 0.01843 | 0.03870 | 0.23 | 0.6339 | 1.019 |
|  |  |  | Pack-Yr-x-Age Squared | -0.00031 | 0.00056 | 0.30 | 0.5845 | 1.000 |
|  |  |  | Pack-Yr-x-Age Cubed | 1.60e-6 | 2.69e-6 | 0.35 | 0.5509 | 1.000 |
|  |  |  |  |  |  |  |  |  |
| 8. | 8454.28 | 8045.88 | PM10 | -0.03828 | 0.06242 | 0.38 | 0.5397 | 0.962 |
|  |  |  | Pack-Years | -0.30897 | 0.86632 | 0.13 | 0.7241 | 0.734 |
|  |  |  | Pack-Yr-x-Age (Yrs) | 0.01869 | 0.03787 | 0.24 | 0.6216 | 1.019 |
|  |  |  | Pack-Yr-x-Age Squared | -0.00032 | 0.00055 | 0.33 | 0.5634 | 1.000 |
|  |  |  | Pack-Yr-x-Age Cubed | 1.68e-6 | 2.63e-6 | 0.41 | 0.5226 | 1.000 |

**Former Smokers Only (Quit for ≥ 10 Years), Based on Pack-Years of Smoking**

39,575 subjects, 259,080 subject-cycle records, 654 events (0.3%), 502,399.8 person-years of follow-up (records with unknown pack-years, unknown years smoked, or unknown time since quitting deleted). **Each model includes stratification by age-month and cycle, also with region as a covariate.**

|  | **AIC w/o Cov.** | **AIC w/ Cov.** | **Covariates** | **Est.** | **Std. Err.** | **Χ2** | **P(Χ2)** | **HR** |
| --- | --- | --- | --- | --- | --- | --- | --- | --- |
| 1. | 5845.55 | 5848.17 | PM10 | 0.14763 | 0.08295 | 3.17 | 0.0751 | 1.159 |
|  |  |  |  |  |  |  |  |  |
| 2. | 5845.55 | 5456.74 | PM10 | 0.15539 | 0.08410 | 3.41 | 0.0646 | 1.168 |
|  |  |  | Pack-Years | 0.03635 | 0.00169 | 462.44 | <0.0001 | 1.037 |
|  |  |  |  |  |  |  |  |  |
| 3. | 5845.55 | 5410.63 | PM10 | 0.14572 | 0.08416 | 3.00 | 0.0834 | 1.157 |
|  |  |  | Pack-Years | 0.02619 | 0.00224 | 136.48 | <0.0001 | 1.027 |
|  |  |  | Years Smoked | 0.03253 | 0.00470 | 47.98 | <0.0001 | 1.033 |
|  |  |  |  |  |  |  |  |  |
| 4. | 5845.55 | 5411.84 | PM10 | 0.14526 | 0.08413 | 2.98 | 0.0842 | 1.156 |
|  |  |  | Pack-Years | 0.02632 | 0.00225 | 137.05 | <0.0001 | 1.027 |
|  |  |  | Years Smoked | 0.02512 | 0.00947 | 7.03 | 0.0080 | 1.025 |
|  |  |  | Months Quit | -0.00069 | 0.00077 | 0.80 | 0.3706 | 0.999 |
|  |  |  |  |  |  |  |  |  |
| 5A. | 5845.55 | 5408.03 | PM10 | 0.14249 | 0.08405 | 2.87 | 0.0900 | 1.153 |
|  |  |  | Pack-Years | 0.08037 | 0.02235 | 12.93 | 0.0003 | 1.084 |
|  |  |  | Years Smoked | 0.02380 | 0.00943 | 6.38 | 0.0116 | 0.999 |
|  |  |  | Months Quit | -0.00076 | 0.00077 | 0.98 | 0.3232 | 0.999 |
|  |  |  | Pack-Yr-x-Age (Yrs) | -0.00072 | 0.00030 | 5.88 | 0.0153 | 0.999 |
|  |  |  |  |  |  |  |  |  |
| 5B. | 5845.55 | 5409.95 | PM10 | 0.14271 | 0.08405 | 2.88 | 0.0895 | 1.153 |
|  |  |  | Pack-Years | 0.13663 | 0.19849 | 0.47 | 0.4912 | 1.146 |
|  |  |  | Years Smoked | 0.02375 | 0.00943 | 6.35 | 0.0118 | 1.024 |
|  |  |  | Months Quit | -0.00076 | 0.00077 | 0.97 | 0.3239 | 0.999 |
|  |  |  | Pack-Yr-x-Age (Yrs) | -0.00228 | 0.00546 | 0.17 | 0.6764 | 0.998 |
|  |  |  | Pack-Yr-x-Age Squared | 0.00001 | 0.00004 | 0.08 | 0.7755 | 1.000 |
|  |  |  |  |  |  |  |  |  |
| 5C. | 5845.55 | 5411.73 | PM10 | 0.14349 | 0.08406 | 2.91 | 0.0878 | 1.154 |
|  |  |  | Pack-Years | -0.50865 | 1.40754 | 0.13 | 0.7178 | 0.601 |
|  |  |  | Years Smoked | 0.02369 | 0.00943 | 6.32 | 0.0119 | 1.024 |
|  |  |  | Months Quit | -0.00076 | 0.00077 | 0.98 | 0.3221 | 0.999 |
|  |  |  | Pack-Yr-x-Age (Yrs) | 0.02518 | 0.05950 | 0.18 | 0.6722 | 1.025 |
|  |  |  | Pack-Yr-x-Age Squared | -0.00038 | 0.00083 | 0.20 | 0.6524 | 1.000 |
|  |  |  | Pack-Yr-x-Age Cubed | 1.80e-6 | 3.88e-6 | 0.21 | 0.6427 | 1.000 |
|  |  |  |  |  |  |  |  |  |
| 6. | 5845.55 | 5454.83 | PM10 | 0.15362 | 0.08403 | 3.34 | 0.0675 | 1.166 |
|  |  |  | Pack-Years | -0.51252 | 1.36072 | 0.14 | 0.7064 | 0.599 |
|  |  |  | Pack-Yr-x-Age (Yrs) | 0.02673 | 0.05748 | 0.22 | 0.6419 | 1.027 |
|  |  |  | Pack-Yr-x-Age Squared | -0.00041 | 0.00081 | 0.26 | 0.6108 | 1.000 |
|  |  |  | Pack-Yr-x-Age Cubed | 2.01e-6 | 3.75e-6 | 0.29 | 0.5914 | 1.000 |

**Full Cohort, Based on Average Packs / Year**

97,303 subjects, 721,127 subject-cycle records, 1,992 events (0.3%), 1,402,829.1 person-years of follow-up (records with unknown pack-years, unknown years of smoking, or unknown time since quitting deleted). **Each model includes stratification by age-month and cycle, also with region as a covariate.**

|  | **AIC w/o Cov.** | **AIC w/ Cov.** | **Covariates** | **Est.** | **Std. Err.** | **Χ2** | **P(Χ2)** | **HR** |
| --- | --- | --- | --- | --- | --- | --- | --- | --- |
| 1. | 21810.08 | 21795.29 | PM10 | 0.04394 | 0.04594 | 0.91 | 0.3389 | 1.045 |
|  |  |  |  |  |  |  |  |  |
| 2. | 21810.08 | 19734.36 | PM10 | 0.04292 | 0.04644 | 0.85 | 0.3553 | 1.044 |
|  |  |  | Current v Never | 3.25414 | 0.08446 | 1484.58 | <0.0001 | 25.897 |
|  |  |  | Former v Never | 1.86354 | 0.08077 | 532.36 | <0.0001 | 6.447 |
|  |  |  |  |  |  |  |  |  |
| 4. | 21810.08 | 18872.04 | PM10 | 0.01583 | 0.04659 | 0.11 | 0.7340 | 1.016 |
|  |  |  | Current v Never | -0.30121 | 0.15980 | 3.55 | 0.0594 | 0.740 |
|  |  |  | Former v Never | -0.38206 | 0.12933 | 8.73 | 0.0031 | 0.682 |
|  |  |  | Average Packs | 1.00699 | 0.13990 | 51.81 | <0.0001 | 2.737 |
|  |  |  | Years Smoked | 0.06870 | 0.00252 | 741.05 | <0.0001 | 1.071 |
|  |  |  |  |  |  |  |  |  |
| 5. | 21810.08 | 18570.23 | PM10 | 0.01543 | 0.04658 | 0.11 | 0.7404 | 1.016 |
|  |  |  | Current v Never | 0.08231 | 0.25021 | 0.11 | 0.7422 | 1.086 |
|  |  |  | Former v Never | 0.03327 | 0.24602 | 0.02 | 0.8924 | 1.034 |
|  |  |  | Average Packs | 1.03455 | 0.14024 | 54.42 | <0.0001 | 2.814 |
|  |  |  | Years Smoked | 0.06099 | 0.00461 | 174.93 | <0.0001 | 1.063 |
|  |  |  | Months Quit | -0.00083 | 0.00042 | 3.89 | 0.0485 | 0.999 |
|  |  |  |  |  |  |  |  |  |
| 6. | 21810.08 | 18866.86 | PM10 | 0.01556 | 0.04658 | 0.11 | 0.7383 | 1.016 |
|  |  |  | Average Packs | 1.06064 | 0.13423 | 62.43 | <0.0001 | 2.888 |
|  |  |  | Years Smoked | 0.06261 | 0.00153 | 1637.99 | <0.0001 | 1.064 |
|  |  |  | Months Quit | -0.00085 | 0.00020 | 17.23 | <0.0001 | 0.999 |
|  |  |  |  |  |  |  |  |  |
| 7A. | 21810.08 | 18868.51 | PM10 | 0.01553 | 0.04658 | 0.11 | 0.7388 | 1.016 |
|  |  |  | Average Packs | 0.45320 | 1.02971 | 0.19 | 0.6598 | 1.573 |
|  |  |  | Years Smoked | 0.06209 | 0.00154 | 1633.25 | <0.0001 | 1.064 |
|  |  |  | Months Quit | -0.00086 | 0.00020 | 17.55 | <0.0001 | 0.999 |
|  |  |  | Ave Pck-x-Age (Yrs) | 0.00895 | 0.01495 | 0.36 | 0.5493 | 1.009 |
|  |  |  |  |  |  |  |  |  |
| 7B. | 21810.08 | 18869.20 | PM10 | 0.01588 | 0.04658 | 0.12 | 0.7331 | 1.016 |
|  |  |  | Average Packs | 3.24320 | 2.63088 | 1.52 | 0.2177 | 25.616 |
|  |  |  | Years Smoked | 0.06206 | 0.00154 | 1631.85 | <0.0001 | 1.064 |
|  |  |  | Months Quit | -0.00086 | 0.00020 | 17.64 | <0.0001 | 0.999 |
|  |  |  | Ave Pck-x-Age (Yrs) | -0.07692 | 0.07623 | 1.02 | 0.3130 | 0.926 |
|  |  |  | Ave Pck-x-Age Squared | 0.00065 | 0.00057 | 1.32 | 0.2504 | 1.001 |
|  |  |  |  |  |  |  |  |  |
| 7C. | 21810.08 | 18870.41 | PM10 | 0.01600 | 0.04657 | 0.12 | 0.7312 | 1.016 |
|  |  |  | Average Packs | 1.61259 | 3.36704 | 0.23 | 0.6320 | 5.016 |
|  |  |  | Years Smoked | 0.06206 | 0.00154 | 1631.17 | <0.0001 | 1.064 |
|  |  |  | Months Quit | -0.00086 | 0.00020 | 17.66 | <0.0001 | 0.999 |
|  |  |  | Ave Pck-x-Age (Yrs) | -0.10255 | 0.08199 | 1.56 | 0.2110 | 0.903 |
|  |  |  | Ave Pck-x-Age Squared | 0.00246 | 0.00217 | 1.28 | 0.2577 | 1.002 |
|  |  |  | Ave Pck-x-Age Cubed | -0.00001 | 0.00002 | 0.73 | 0.3931 | 1.000 |
|  |  |  |  |  |  |  |  |  |
| 8. | 21810.08 | 18886.14 | PM10 | 0.01986 | 0.04659 | 0.18 | 0.6700 | 1.020 |
|  |  |  | Average Packs | 1.35328 | 3.57407 | 0.14 | 0.7050 | 3.870 |
|  |  |  | Years Smoked | 0.06552 | 0.00139 | 2215.29 | <0.0001 | 1.068 |
|  |  |  | Ave Pck-x-Age (Yrs) | -0.10251 | 0.08132 | 1.59 | 0.2074 | 0.903 |
|  |  |  | Ave Pck-x-Age Squared | 0.00254 | 0.00231 | 1.21 | 0.2721 | 1.003 |
|  |  |  | Ave Pck-x-Age Cubed | -0.00002 | 0.00002 | 0.71 | 0.3986 | 1.000 |

**Never Smokers**

44,245 subjects, 337,374 subject-cycle records, 179 events (0.1%), 659,099.5 person-years of follow-up.

**Each model includes stratification by age-month and cycle, also with region as a covariate.**

|  | **AIC w/o Cov.** | **AIC w/ Cov.** | **Covariates** | **Est.** | **Std. Err.** | **Χ2** | **P(Χ2)** | **HR** |
| --- | --- | --- | --- | --- | --- | --- | --- | --- |
| 1. | 1667.02 | 1667.85 | PM10 | 0.10250 | 0.13822 | 0.55 | 0.4583 | 1.108 |
|  |  |  |  |  |  |  |  |  |

**Never or Former Smokers (Quit for ≥ 10 Years), Based on Average Packs / Year**

83,819 subjects, 596,454 subject-cycle records, 833 events (0.1%), 1,161,499.3 person-years of follow-up (records with unknown time since quitting deleted). **Each model includes stratification by age-month and cycle, also with region as a covariate.**

|  | **AIC w/o Cov.** | **AIC w/ Cov.** | **Covariates** | **Est.** | **Std. Err.** | **Χ2** | **P(Χ2)** | **HR** |
| --- | --- | --- | --- | --- | --- | --- | --- | --- |
| 1. | 8778.12 | 8777.60 | PM10 | 0.09265 | 0.07044 | 1.73 | 0.1884 | 1.097 |
|  |  |  |  |  |  |  |  |  |
| 2. | 8778.12 | 8380.45 | PM10 | 0.13065 | 0.07092 | 3.39 | 0.0654 | 1.140 |
|  |  |  | Former v Never | 1.51921 | 0.08476 | 321.23 | <0.0001 | 4.569 |
|  |  |  |  |  |  |  |  |  |
| 4. | 8778.12 | 8067.28 | PM10 | 0.11627 | 0.07144 | 2.65 | 0.1036 | 1.123 |
|  |  |  | Former v Never | -0.25825 | 0.16191 | 2.54 | 0.1107 | 0.772 |
|  |  |  | Average Packs | 0.61665 | 0.19821 | 9.68 | 0.0019 | 1.853 |
|  |  |  | Years Smoked | 0.06493 | 0.00399 | 264.92 | <0.0001 | 1.067 |
|  |  |  |  |  |  |  |  |  |
| 5A. | 8778.12 | 8066.47 | PM10 | 0.11587 | 0.07144 | 2.63 | 0.1048 | 1.123 |
|  |  |  | Former v Never | 0.32185 | 0.37667 | 0.73 | 0.3928 | 1.380 |
|  |  |  | Average Packs | 0.62878 | 0.19848 | 10.04 | 0.0015 | 1.875 |
|  |  |  | Years Smoked | 0.05481 | 0.00713 | 59.16 | <0.0001 | 1.056 |
|  |  |  | Months Quit | -0.00106 | 0.00062 | 2.870 | 0.0899 | 0.999 |
|  |  |  |  |  |  |  |  |  |
| 5B. | 8778.12 | 8069.38 | PM10 | 0.11626 | 0.07145 | 2.65 | 0.1037 | 1.123 |
|  |  |  | Former v Never | 0.35521 | 0.37993 | 0.87 | 0.3498 | 1.426 |
|  |  |  | Average Packs | 4.93226 | 4.58357 | 1.16 | 0.2819 | 138.692 |
|  |  |  | Years Smoked | 0.05415 | 0.00718 | 56.86 | <0.0001 | 1.056 |
|  |  |  | Months Quit | -0.00113 | 0.00063 | 3.15 | 0.0759 | 0.999 |
|  |  |  | Ave Pck-x-Age (Yrs) | -0.22906 | 0.13676 | 2.80 | 0.0939 | 0.795 |
|  |  |  | Ave Pck-x-Age Squared | 0.00374 | 0.00299 | 1.56 | 0.2110 | 1.004 |
|  |  |  | Ave Pck-x-Age Cubed | -0.00002 | 0.00002 | 0.68 | 0.4082 | 1.000 |
|  |  |  |  |  |  |  |  |  |
| 6. | 8778.12 | 8065.19 | PM10 | 0.11566 | 0.07144 | 2.62 | 0.1055 | 1.123 |
|  |  |  | Average Packs | 0.66505 | 0.19151 | 12.06 | 0.0005 | 1.945 |
|  |  |  | Years Smoked | 0.06057 | 0.00231 | 689.00 | <0.0001 | 1.062 |
|  |  |  | Months Quit | -0.00058 | 0.00027 | 4.57 | 0.0324 | 0.999 |
|  |  |  |  |  |  |  |  |  |
| 7A. | 8778.12 | 8067.17 | PM10 | 0.11569 | 0.07144 | 2.62 | 0.1054 | 1.123 |
|  |  |  | Average Packs | 0.49047 | 1.36188 | 0.13 | 0.7187 | 1.633 |
|  |  |  | Years Smoked | 0.06058 | 0.00231 | 689.10 | <0.0001 | 1.062 |
|  |  |  | Months Quit | -0.00058 | 0.00027 | 4.56 | 0.0326 | 0.999 |
|  |  |  | Ave Pck-x-Age (Yrs) | 0.00255 | 0.01956 | 0.02 | 0.8968 | 1.003 |
|  |  |  |  |  |  |  |  |  |
| 7B. | 8778.12 | 8066.98 | PM10 | 0.11579 | 0.07146 | 2.62 | 0.1052 | 1.123 |
|  |  |  | Average Packs | 6.26227 | 1.36188 | 2.37 | 0.1239 | 524.410 |
|  |  |  | Years Smoked | 0.06054 | 0.00231 | 687.77 | <0.0001 | 1.062 |
|  |  |  | Months Quit | -0.00058 | 0.00027 | 4.61 | 0.0318 | 0.999 |
|  |  |  | Ave Pck-x-Age (Yrs) | -0.17331 | 0.11932 | 2.11 | 0.1464 | 0.841 |
|  |  |  | Ave Pck-x-Age Squared | 0.00132 | 0.00088 | 2.22 | 0.1356 | 1.001 |
|  |  |  |  |  |  |  |  |  |
| 7C. | 8778.12 | 8068.24 | PM10 | 0.11602 | 0.07146 | 2.62 | 0.1045 | 1.123 |
|  |  |  | Average Packs | 5.10264 | 4.53198 | 1.27 | 0.2602 | 164.455 |
|  |  |  | Years Smoked | 0.06052 | 0.00231 | 686.83 | <0.0001 | 1.062 |
|  |  |  | Months Quit | -0.00059 | 0.00027 | 4.69 | 0.0303 | 0.999 |
|  |  |  | Ave Pck-x-Age (Yrs) | -0.22925 | 0.13701 | 2.80 | 0.0943 | 0.795 |
|  |  |  | Ave Pck-x-Age Squared | 0.00371 | 0.00297 | 1.56 | 0.2117 | 1.004 |
|  |  |  | Ave Pck-x-Age Cubed | -0.00002 | 0.00002 | 0.69 | 0.4051 | 1.000 |
|  |  |  |  |  |  |  |  |  |
| 8. | 8778.12 | 8070.99 | PM10 | 0.11834 | 0.07151 | 2.74 | 0.0976 | 1.126 |
|  |  |  | Average Packs | 5.02655 | 4.67024 | 1.16 | 0.2818 | 152.407 |
|  |  |  | Years Smoked | 0.05969 | 0.00232 | 664.26 | <0.0001 | 1.062 |
|  |  |  | Ave Pck-x-Age (Yrs) | -0.22775 | 0.13571 | 2.82 | 0.0933 | 0.796 |
|  |  |  | Ave Pck-x-Age Squared | 0.00365 | 0.00307 | 1.42 | 0.2340 | 1.004 |
|  |  |  | Ave Pck-x-Age Cubed | -0.00002 | 0.00002 | 0.62 | 0.4321 | 1.000 |

**Current or Former Smokers (Quit for < 10 Years), Based on Average Packs / Year**

25,767 subjects, 124,673 subject-cycle records, 1,159 events (0.9%), 241,329.8 person-years of follow-up (records with unknown pack-years, unknown years of smoking, or unknown time since quitting deleted). **Each model includes stratification by age-month and cycle, also with region as a covariate.**

|  | **AIC w/o Cov.** | **AIC w/ Cov.** | **Covariates** | **Est.** | **Std. Err.** | **Χ2** | **P(Χ2)** | **HR** |
| --- | --- | --- | --- | --- | --- | --- | --- | --- |
| 1. | 8454.28 | 8449.94 | PM10 | -0.04259 | 0.06203 | 0.47 | 0.4923 | 0.958 |
|  |  |  |  |  |  |  |  |  |
| 2. | 8454.28 | 8396.61 | PM10 | -0.04478 | 0.06206 | 0.52 | 0.4706 | 0.956 |
|  |  |  | Current v Former | 0.45298 | 0.06170 | 53.90 | <0.0001 | 1.573 |
|  |  |  |  |  |  |  |  |  |
| 3. | 8454.28 | 8150.90 | PM10 | -0.04456 | 0.06216 | 0.51 | 0.4735 | 0.956 |
|  |  |  | Current v Former | -0.03987 | 0.07056 | 0.32 | 0.5721 | 0.961 |
|  |  |  | Average Packs | 3.62725 | 0.28178 | 165.71 | <0.0001 | 37.609 |
|  |  |  | Years Smoked | 0.08461 | 0.00652 | 168.23 | <0.0001 | 1.088 |
|  |  |  |  |  |  |  |  |  |
| 4. | 8454.28 | 8149.22 | PM10 | -0.04477 | 0.06216 | 0.52 | 0.4713 | 0.956 |
|  |  |  | Average Packs | 3.57887 | 0.26780 | 178.59 | <0.0001 | 35.833 |
|  |  |  | Years Smoked | 0.08286 | 0.00570 | 211.04 | <0.0001 | 1.086 |
|  |  |  |  |  |  |  |  |  |
| 5. | 8454.28 | 8148.97 | PM10 | -0.04541 | 0.06218 | 0.53 | 0.4652 | 0.956 |
|  |  |  | Current v Former | 0.10360 | 0.10280 | 1.01 | 0.3135 | 1.109 |
|  |  |  | Average Packs | 3.74326 | 0.29051 | 166.02 | <0.0001 | 42.235 |
|  |  |  | Years Smoked | 0.08965 | 0.00713 | 157.93 | <0.0001 | 1.094 |
|  |  |  | Months Quit | 0.00301 | 0.00152 | 3.93 | 0.0473 | 1.003 |
|  |  |  |  |  |  |  |  |  |
| 6. | 8454.28 | 8148.00 | PM10 | -0.04485 | 0.06217 | 0.52 | 0.4707 | 0.956 |
|  |  |  | Average Packs | 3.76354 | 0.28991 | 168.53 | <0.0001 | 43.101 |
|  |  |  | Years Smoked | 0.09010 | 0.00712 | 160.07 | <0.0001 | 1.094 |
|  |  |  | Months Quit | 0.00191 | 0.00106 | 3.24 | 0.0716 | 1.002 |
|  |  |  |  |  |  |  |  |  |
| 7A. | 8454.28 | 8149.83 | PM10 | -0.04569 | 0.06222 | 0.54 | 0.4627 | 0.955 |
|  |  |  | Average Packs | 2.71457 | 2.58335 | 1.10 | 0.2934 | 15.098 |
|  |  |  | Years Smoked | 0.09032 | 0.00715 | 159.69 | <0.0001 | 1.095 |
|  |  |  | Months Quit | 0.00194 | 0.00106 | 3.32 | 0.0685 | 1.002 |
|  |  |  | Ave Pck-x-Age (Yrs) | 0.01551 | 0.03789 | 0.17 | 0.6822 | 1.016 |
|  |  |  |  |  |  |  |  |  |
| 7B. | 8454.28 | 8151.25 | PM10 | -0.04519 | 0.06222 | 0.53 | 0.4677 | 0.956 |
|  |  |  | Average Packs | 4.79839 | 3.76207 | 1.63 | 0.2021 | 121.315 |
|  |  |  | Years Smoked | 0.09049 | 0.00716 | 159.85 | <0.0001 | 1.095 |
|  |  |  | Months Quit | 0.00197 | 0.00106 | 3.41 | 0.0648 | 1.002 |
|  |  |  | Ave Pck-x-Age (Yrs) | -0.05719 | 0.10257 | 0.31 | 0.5772 | 0.944 |
|  |  |  | Ave Pck-x-Age Squared | 0.00061 | 0.00080 | 0.58 | 0.4453 | 1.001 |
|  |  |  |  |  |  |  |  |  |
| 7C. | 8454.28 | 8151.70 | PM10 | -0.04457 | 0.06225 | 0.52 | 0.4740 | 0.956 |
|  |  |  | Average Packs | 15.38815 | 9.13338 | 2.84 | 0.0920 | >999 |
|  |  |  | Years Smoked | 0.09049 | 0.00714 | 160.71 | <0.0001 | 1.095 |
|  |  |  | Months Quit | 0.00194 | 0.00106 | 3.33 | 0.0681 | 1.002 |
|  |  |  | Ave Pck-x-Age (Yrs) | -0.04192 | 0.10329 | 0.16 | 0.6849 | 0.959 |
|  |  |  | Ave Pck-x-Age Squared | -0.00682 | 0.00592 | 1.33 | 0.2493 | 0.993 |
|  |  |  | Ave Pck-x-Age Cubed | 0.00007 | 0.00006 | 1.61 | 0.2044 | 1.000 |
|  |  |  |  |  |  |  |  |  |

**Former Smokers Only (Quit for ≥ 10 Years), Based on Average Packs / Year**

39,575 subjects, 259,080 subject-cycle records, 654 events (0.3%), 502,399.8 person-years of follow-up (records with unknown time since quitting deleted). **Each model includes stratification by age-month and cycle, also with region as a covariate.**

|  | **AIC w/o Cov.** | **AIC w/ Cov.** | **Covariates** | **Est.** | **Std. Err.** | **Χ2** | **P(Χ2)** | **HR** |
| --- | --- | --- | --- | --- | --- | --- | --- | --- |
| 1. | 5845.55 | 5848.17 | PM10 | 0.14763 | 0.08295 | 3.17 | 0.0751 | 1.159 |
|  |  |  |  |  |  |  |  |  |
| 2. | 5845.55 | 5532.03 | PM10 | 0.13053 | 0.08388 | 2.42 | 0.1197 | 1.139 |
|  |  |  | Average Packs | 0.61345 | 0.19996 | 9.41 | 0.0022 | 1.847 |
|  |  |  | Years Smoked | 0.06719 | 0.00415 | 261.60 | <0.0001 | 1.069 |
|  |  |  |  |  |  |  |  |  |
| 3. | 5845.55 | 5533.80 | PM10 | 0.13030 | 0.08387 | 2.41 | 0.1203 | 1.139 |
|  |  |  | Average Packs | 0.61777 | 0.20002 | 9.54 | 0.0020 | 1.855 |
|  |  |  | Years Smoked | 0.06329 | 0.00903 | 49.12 | <0.0001 | 1.065 |
|  |  |  | Months Quit | -0.00037 | 0.00077 | 0.23 | 0.6280 | 1.000 |
|  |  |  |  |  |  |  |  |  |
| 4A. | 5845.55 | 5535.23 | PM10 | 0.13062 | 0.08388 | 2.43 | 0.1194 | 1.140 |
|  |  |  | Average Packs | -0.53073 | 1.56540 | 0.11 | 0.7346 | 0.588 |
|  |  |  | Years Smoked | 0.06369 | 0.00903 | 49.73 | <0.0001 | 1.066 |
|  |  |  | Months Quit | -0.00037 | 0.00077 | 0.23 | 0.6272 | 1.000 |
|  |  |  | Ave Pck-x-Age (Yrs) | 0.01660 | 0.02220 | 0.56 | 0.4547 | 1.017 |
|  |  |  |  |  |  |  |  |  |
| 4B. | 5845.55 | 5534.05 | PM10 | 0.13022 | 0.08392 | 2.41 | 0.1207 | 1.139 |
|  |  |  | Average Packs | 6.57041 | 4.20372 | 2.44 | 0.1181 | 713.660 |
|  |  |  | Years Smoked | 0.06369 | 0.00903 | 49.75 | <0.0001 | 1.066 |
|  |  |  | Months Quit | -0.00037 | 0.00077 | 0.22 | 0.6358 | 1.000 |
|  |  |  | Ave Pck-x-Age (Yrs) | -0.19936 | 0.12187 | 2.67 | 0.1019 | 0.819 |
|  |  |  | Ave Pck-x-Age Squared | 0.00161 | 0.00090 | 3.24 | 0.0719 | 1.002 |
|  |  |  |  |  |  |  |  |  |
| 4C. | 5845.55 | 5535.90 | PM10 | 0.13050 | 0.08393 | 2.42 | 0.1200 | 1.139 |
|  |  |  | Average Packs | 5.94112 | 4.62420 | 1.65 | 0.1989 | 380.362 |
|  |  |  | Years Smoked | 0.06368 | 0.00903 | 49.77 | <0.0001 | 1.066 |
|  |  |  | Months Quit | -0.00037 | 0.00077 | 0.23 | 0.6304 | 1.000 |
|  |  |  | Ave Pck-x-Age (Yrs) | -0.22369 | 0.13747 | 2.65 | 0.1037 | 0.800 |
|  |  |  | Yrs Smk-x-Age Squared | 0.00272 | 0.00302 | 0.81 | 0.3665 | 1.003 |
|  |  |  | Yrs Smk-x-Age Cubed | -8.91 e-6 | 0.00002 | 0.15 | 0.7014 | 1.000 |
|  |  |  |  |  |  |  |  |  |

**Section 5.2: PM2.5–10 (coarse PM)**

**Full Cohort, Based on Pack-Years of Smoking**

97,303 subjects, 721,127 subject-cycle records, 1,992 events (0.3%), 1,402,829.1 person-years of follow-up (records with unknown pack-years, unknown years of smoking, or unknown time since quitting deleted). **Each model includes stratification by age-month and cycle, also with region as a covariate.**

|  | **AIC w/o Cov.** | **AIC w/ Cov.** | **Covariates** | **Est.** | **Std. Err.** | **Χ2** | **P(Χ2)** | **HR** |
| --- | --- | --- | --- | --- | --- | --- | --- | --- |
| 1. | 21810.08 | 21794.68 | PM Coarse | 0.08827 | 0.07113 | 1.54 | 0.2146 | 1.092 |
|  |  |  |  |  |  |  |  |  |
| 2. | 21810.08 | 19734.47 | PM Coarse | 0.06232 | 0.07202 | 0.75 | 0.3869 | 1.064 |
|  |  |  | Current v Never | 3.25390 | 0.08446 | 1484.26 | <0.0001 | 25.891 |
|  |  |  | Former v Never | 1.86282 | 0.08076 | 532.026 | <0.0001 | 6.442 |
|  |  |  |  |  |  |  |  |  |
| 3. | 21810.08 | 18721.83 | PM Coarse | 0.02702 | 0.07180 | 0.14 | 0.7067 | 1.027 |
|  |  |  | Current v Never | 1.40526 | 0.10476 | 179.92 | <0.0001 | 4.077 |
|  |  |  | Former v Never | 0.96271 | 0.08773 | 120.41 | <0.0001 | 2.619 |
|  |  |  | Pack-Years | 0.03113 | 0.00092 | 1142.75 | <0.0001 | 1.032 |
|  |  |  |  |  |  |  |  |  |
| 4. | 21810.08 | 18550.52 | PM Coarse | 0.02195 | 0.07209 | 0.09 | 0.7608 | 1.022 |
|  |  |  | Current v Never | 0.18414 | 0.14328 | 1.65 | 0.1987 | 1.202 |
|  |  |  | Former v Never | 0.13068 | 0.11341 | 1.33 | 0.2492 | 1.140 |
|  |  |  | Pack-Years | 0.02219 | 0.00114 | 375.43 | <0.0001 | 1.022 |
|  |  |  | Years Smoked | 0.03596 | 0.00277 | 168.48 | <0.0001 | 1.037 |
|  |  |  |  |  |  |  |  |  |
| 5. | 21810.08 | 18545.69 | PM Coarse | 0.02048 | 0.07205 | 0.08 | 0.7762 | 1.021 |
|  |  |  | Current v Never | 0.72037 | 0.24607 | 8.57 | 0.0034 | 2.055 |
|  |  |  | Former v Never | 0.70777 | 0.24417 | 8.40 | 0.0037 | 2.029 |
|  |  |  | Pack-Years | 0.02240 | 0.00115 | 380.04 | <0.0001 | 1.023 |
|  |  |  | Years Smoked | 0.02509 | 0.00490 | 26.19 | <0.0001 | 1.025 |
|  |  |  | Months Quit | -0.00111 | 0.00042 | 7.02 | 0.0081 | 0.999 |
|  |  |  |  |  |  |  |  |  |
| 6. | 21810.08 | 18550.06 | PM Coarse | 0.02140 | 0.07209 | 0.09 | 0.7666 | 1.022 |
|  |  |  | Pack-Years | 0.02212 | 0.00114 | 377.00 | <0.0001 | 1.022 |
|  |  |  | Years Smoked | 0.03824 | 0.00208 | 337.45 | <0.0001 | 1.039 |
|  |  |  | Months Quit | -0.00006 | 0.00018 | 0.11 | 0.7373 | 1.000 |
|  |  |  |  |  |  |  |  |  |
| 7A. | 21810.08 | 18509.79 | PM Coarse | 0.01561 | 0.07211 | 0.05 | 0.8286 | 1.016 |
|  |  |  | Pack-Years | 0.07575 | 0.00832 | 82.95 | <0.0001 | 1.079 |
|  |  |  | Years Smoked | 0.03853 | 0.00207 | 346.82 | <0.0001 | 1.039 |
|  |  |  | Months Quit | -0.00005 | 0.00018 | 0.08 | 0.7796 | 1.000 |
|  |  |  | Pack-Yr-x-Age (Yrs) | -0.00074 | 0.00011 | 41.88 | <0.0001 | 0.999 |
|  |  |  |  |  |  |  |  |  |
| 7B. | 21810.08 | 18511.78 | PM Coarse | 0.01566 | 0.07211 | 0.05 | 0.8280 | 1.016 |
|  |  |  | Pack-Years | 0.08009 | 0.06737 | 1.41 | 0.2345 | 1.083 |
|  |  |  | Years Smoked | 0.03852 | 0.00208 | 344.42 | <0.0001 | 1.039 |
|  |  |  | Months Quit | -0.00005 | 0.00018 | 0.08 | 0.7782 | 1.000 |
|  |  |  | Pack-Yr-x-Age (Yrs) | -0.00087 | 0.00191 | 0.21 | 0.6486 | 0.999 |
|  |  |  | Pack-Yr-x-Age Squared | 8.76 e-7 | 0.00001 | 0.01 | 0.9481 | 1.000 |
|  |  |  |  |  |  |  |  |  |
| 7C. | 21810.08 | 18513.15 | PM Coarse | 0.01563 | 0.07210 | 0.05 | 0.8284 | 1.016 |
|  |  |  | Pack-Years | -0.29417 | 0.47782 | 0.38 | 0.5381 | 0.745 |
|  |  |  | Years Smoked | 0.03849 | 0.00208 | 343.90 | <0.0001 | 1.039 |
|  |  |  | Months Quit | -0.00005 | 0.00018 | 0.08 | 0.7735 | 1.000 |
|  |  |  | Pack-Yr-x-Age (Yrs) | 0.01547 | 0.02073 | 0.56 | 0.4557 | 1.016 |
|  |  |  | Pack-Yr-x-Age Squared | -0.00023 | 0.00030 | 0.62 | 0.4308 | 1.000 |
|  |  |  | Pack-Yr-x-Age Cubed | 1.12e-6 | 1.42e-6 | 0.63 | 0.4286 | 1.000 |
|  |  |  |  |  |  |  |  |  |
| 8. | 21810.08 | 18879.23 | PM Coarse | 0.02368 | 0.07168 | 0.11 | 0.7411 | 1.024 |
|  |  |  | Pack-Years | -0.28240 | 0.42969 | 0.43 | 0.5110 | 0.754 |
|  |  |  | Pack-Yr-x-Age (Yrs) | 0.01659 | 0.01862 | 0.79 | 0.3727 | 1.017 |
|  |  |  | Pack-Yr-x-Age Squared | -0.00026 | 0.00027 | 0.98 | 0.3211 | 1.000 |
|  |  |  | Pack-Yr-x-Age Cubed | 1.34e-6 | 1.27e-6 | 1.11 | 0.2912 | 1.000 |

**Never Smokers**

44,245 subjects, 337,374 subject-cycle records, 179 events (0.1%), 659,099.5 person-years of follow-up.

**Each model includes stratification by age-month and cycle, also with region as a covariate.**

|  | **AIC w/o Cov.** | **AIC w/ Cov.** | **Covariates** | **Est.** | **Std. Err.** | **Χ2** | **P(Χ2)** | **HR** |
| --- | --- | --- | --- | --- | --- | --- | --- | --- |
| 1. | 1667.02 | 1668.18 | PM Coarse | 0.09761 | 0.21155 | 0.21 | 0.6445 | 1.103 |
|  |  |  |  |  |  |  |  |  |

**Never or Former Smokers (Quit for ≥ 10 Years), Based on Pack-Years of Smoking**

83,819 subjects, 596,454 subject-cycle records, 833 events (0.1%), 1,161,499.3 person-years of follow-up (records with unknown time since quitting deleted). **Each model includes stratification by age-month and cycle, also with region as a covariate.**

|  | **AIC w/o Cov.** | **AIC w/ Cov.** | **Covariates** | **Est.** | **Std. Err.** | **Χ2** | **P(Χ2)** | **HR** |
| --- | --- | --- | --- | --- | --- | --- | --- | --- |
| 1. | 8778.12 | 8778.12 | PM Coarse | 0.09265 | 0.07044 | 1.73 | 0.1884 | 1.097 |
|  |  |  |  |  |  |  |  |  |
| 2. | 8778.12 | 8382.31 | PM Coarse | 0.13243 | 0.10716 | 1.53 | 0.2165 | 1.142 |
|  |  |  | Former v Never | 1.51637 | 0.08475 | 320.17 | <0.0001 | 4.556 |
|  |  |  |  |  |  |  |  |  |
| 3. | 8778.12 | 7989.03 | PM Coarse | 0.11722 | 0.10807 | 1.18 | 0.2781 | 1.124 |
|  |  |  | Former v Never | 0.61175 | 0.10082 | 36.82 | <0.0001 | 1.844 |
|  |  |  | Pack-Years | 0.03606 | 0.00166 | 472.49 | <0.0001 | 1.037 |
|  |  |  |  |  |  |  |  |  |
| 4. | 8778.12 | 7946.07 | PM Coarse | 0.11130 | 0.10844 | 1.05 | 0.3074 | 1.118 |
|  |  |  | Former v Never | 0.08477 | 0.13299 | 0.41 | 0.5238 | 1.088 |
|  |  |  | Pack-Years | 0.02619 | 0.00222 | 138.68 | <0.0001 | 1.027 |
|  |  |  | Years Smoked | 0.03060 | 0.00455 | 45.27 | <0.0001 | 1.031 |
|  |  |  |  |  |  |  |  |  |
| 5A. | 8778.12 | 7944.07 | PM Coarse | 0.11097 | 0.10840 | 1.05 | 0.3059 | 1.117 |
|  |  |  | Former v Never | 0.79179 | 0.37037 | 4.57 | 0.0325 | 2.207 |
|  |  |  | Pack-Years | 0.02640 | 0.00223 | 140.12 | <0.0001 | 1.027 |
|  |  |  | Years Smoked | 0.01799 | 0.00764 | 5.55 | 0.0185 | 1.018 |
|  |  |  | Months Quit | -0.00127 | 0.00063 | 4.12 | 0.0423 | 0.999 |
|  |  |  |  |  |  |  |  |  |
| 5B. | 8778.12 | 7941.37 | PM Coarse | 0.10475 | 0.10849 | 0.93 | 0.3343 | 1.110 |
|  |  |  | Former v Never | 0.51435 | 0.40058 | 1.65 | 0.1991 | 1.673 |
|  |  |  | Pack-Years | -0.61344 | 1.15146 | 0.28 | 0.5942 | 0.541 |
|  |  |  | Years Smoked | 0.02299 | 0.00807 | 8.12 | 0.0044 | 1.023 |
|  |  |  | Months Quit | -0.00084 | 0.00066 | 1.60 | 0.2059 | 0.999 |
|  |  |  | Pack-Yr-x-Age (Yrs) | 0.02720 | 0.04866 | 0.31 | 0.5762 | 1.028 |
|  |  |  | Pack-Yr-x-Age Squared | -0.00037 | 0.00068 | 0.30 | 0.5856 | 1.000 |
|  |  |  | Pack-Yr-x-Age Cubed | 1.64e-6 | 3.17e-6 | 0.27 | 0.6049 | 1.000 |
|  |  |  |  |  |  |  |  |  |
| 6. | 8778.12 | 7946.47 | PM Coarse | 0.11061 | 0.10847 | 1.04 | 0.3079 | 1.117 |
|  |  |  | Pack-Years | 0.02607 | 0.00222 | 138.01 | <0.0001 | 1.026 |
|  |  |  | Years Smoked | 0.03252 | 0.00352 | 85.20 | <0.0001 | 1.033 |
|  |  |  | Months Quit | -0.00002 | 0.00022 | 0.01 | 0.9221 | 1.000 |
|  |  |  |  |  |  |  |  |  |
| 7A. | 8778.12 | 7937.45 | PM Coarse | 0.10399 | 0.10854 | 0.92 | 0.3380 | 1.110 |
|  |  |  | Pack-Years | 0.08519 | 0.01771 | 23.13 | <0.0001 | 1.089 |
|  |  |  | Years Smoked | 0.03223 | 0.00351 | 84.14 | <0.0001 | 1.033 |
|  |  |  | Months Quit | -0.00004 | 0.00022 | 0.03 | 0.8668 | 1.000 |
|  |  |  | Pack-Yr-x-Age (Yrs) | -0.00079 | 0.00024 | 11.19 | 0.0008 | 0.999 |
|  |  |  |  |  |  |  |  |  |
| 7B. | 8778.12 | 7939.14 | PM Coarse | 0.10330 | 0.10856 | 0.90 | 0.3413 | 1.109 |
|  |  |  | Pack-Years | -0.00069 | 0.15640 | 0.00 | 0.9965 | 0.999 |
|  |  |  | Years Smoked | 0.03234 | 0.00352 | 84.45 | <0.0001 | 1.033 |
|  |  |  | Months Quit | -0.00004 | 0.00022 | 0.03 | 0.8603 | 1.000 |
|  |  |  | Pack-Yr-x-Age (Yrs) | 0.00159 | 0.00431 | 0.13 | 0.7127 | 1.002 |
|  |  |  | Pack-Yr-x-Age Squared | -0.00002 | 0.00003 | 0.30 | 0.5802 | 1.000 |
|  |  |  |  |  |  |  |  |  |
| 7C. | 8778.12 | 7940.98 | PM Coarse | 0.10381 | 0.10854 | 0.91 | 0.3389 | 1.109 |
|  |  |  | Pack-Years | -0.45672 | 1.13630 | 0.16 | 0.6877 | 0.633 |
|  |  |  | Years Smoked | 0.03232 | 0.00352 | 84.30 | <0.0001 | 1.033 |
|  |  |  | Months Quit | -0.00004 | 0.00022 | 0.03 | 0.8672 | 1.000 |
|  |  |  | Pack-Yr-x-Age (Yrs) | 0.02101 | 0.04810 | 0.19 | 0.6622 | 1.021 |
|  |  |  | Pack-Yr-x-Age Squared | -0.00029 | 0.00067 | 0.18 | 0.6674 | 1.000 |
|  |  |  | Pack-Yr-x-Age Cubed | 1.28e-6 | 3.14e-6 | 0.16 | 0.6845 | 1.000 |
|  |  |  |  |  |  |  |  |  |
| 8. | 8778.12 | 8018.33 | PM Coarse | 0.10689 | 0.10829 | 0.97 | 0.3236 | 1.113 |
|  |  |  | Pack-Years | -0.46678 | 1.06297 | 0.19 | 0.6606 | 0.627 |
|  |  |  | Pack-Yr-x-Age (Yrs) | 0.02355 | 0.04492 | 0.27 | 0.6032 | 1.024 |
|  |  |  | Pack-Yr-x-Age Squared | -0.00034 | 0.00063 | 0.29 | 0.5894 | 1.000 |
|  |  |  | Pack-Yr-x-Age Cubed | 1.58e-6 | 2.93e-6 | 0.29 | 0.5885 | 1.000 |

**Current or Former Smokers (Quit for < 10 Years), Based on Pack-Years of Smoking**

25,767 subjects, 124,673 subject-cycle records, 1,159 events (0.9%), 241,329.8 person-years of follow-up (records with unknown pack-years, unknown years of smoking, or unknown time since quitting deleted). **Each model includes stratification by age-month and cycle, also with region as a covariate.**

|  | **AIC w/o Cov.** | **AIC w/ Cov.** | **Covariates** | **Est.** | **Std. Err.** | **Χ2** | **P(Χ2)** | **HR** |
| --- | --- | --- | --- | --- | --- | --- | --- | --- |
| 1. | 8454.28 | 8450.38 | PM Coarse | -0.01705 | 0.09824 | 0.03 | 0.8622 | 0.983 |
|  |  |  |  |  |  |  |  |  |
| 2. | 8454.28 | 8397.10 | PM Coarse | -0.01938 | 0.09843 | 0.04 | 0.8439 | 0.981 |
|  |  |  | Current v Former | 0.45282 | 0.06170 | 53.86 | <0.0001 | 1.573 |
|  |  |  |  |  |  |  |  |  |
| 3. | 8454.28 | 8051.65 | PM Coarse | -0.03160 | 0.09832 | 0.10 | 0.7479 | 0.969 |
|  |  |  | Current v Former | 0.18767 | 0.06368 | 8.68 | 0.0032 | 1.206 |
|  |  |  | Pack-Years | 0.02383 | 0.00126 | 360.36 | <0.0001 | 1.024 |
|  |  |  |  |  |  |  |  |  |
| 4. | 8454.28 | 8025.01 | PM Coarse | -0.03071 | 0.09848 | 0.10 | 0.7551 | 0.970 |
|  |  |  | Current v Former | 0.03226 | 0.07032 | 0.21 | 0.6464 | 1.033 |
|  |  |  | Pack-Years | 0.02088 | 0.00137 | 231.08 | <0.0001 | 1.021 |
|  |  |  | Years Smoked | 0.03311 | 0.00652 | 25.81 | <0.0001 | 1.034 |
|  |  |  |  |  |  |  |  |  |
| 5A. | 8454.28 | 8026.47 | PM Coarse | -0.03938 | 0.06254 | 0.40 | 0.5289 | 0.961 |
|  |  |  | Current v Former | 0.08738 | 0.10316 | 0.72 | 0.3970 | 1.091 |
|  |  |  | Pack-Years | 0.02085 | 0.00137 | 230.10 | <0.0001 | 1.021 |
|  |  |  | Years Smoked | 0.03480 | 0.00695 | 25.08 | <0.0001 | 1.035 |
|  |  |  | Months Quit | 0.00111 | 0.00151 | 0.54 | 0.4611 | 1.001 |
|  |  |  |  |  |  |  |  |  |
| 5B. | 8454.28 | 8017.12 | PM Coarse | -0.03781 | 0.09840 | 0.15 | 0.7008 | 0.963 |
|  |  |  | Current v Former | 0.08691 | 0.10306 | 0.71 | 0.3991 | 1.091 |
|  |  |  | Pack-Years | -0.32850 | 0.88518 | 0.14 | 0.7106 | 0.720 |
|  |  |  | Years Smoked | 0.03336 | 0.00691 | 23.32 | <0.0001 | 1.034 |
|  |  |  | Months Quit | 0.00111 | 0.00150 | 0.54 | 0.4593 | 1.001 |
|  |  |  | Pack-Yr-x-Age (Yrs) | 0.01889 | 0.03871 | 0.24 | 0.6256 | 1.019 |
|  |  |  | Pack-Yr-x-Age Squared | -0.00031 | 0.00056 | 0.31 | 0.5766 | 1.000 |
|  |  |  | Pack-Yr-x-Age Cubed | 1.63e-6 | 2.69e-6 | 0.37 | 0.5433 | 1.000 |
|  |  |  |  |  |  |  |  |  |
| 6. | 8454.28 | 8025.19 | PM Coarse | -0.03055 | 0.09848 | 0.10 | 0.7564 | 0.970 |
|  |  |  | Pack-Years | 0.02090 | 0.00137 | 231.63 | <0.0001 | 1.021 |
|  |  |  | Years Smoked | 0.03506 | 0.00694 | 25.50 | <0.0001 | 1.036 |
|  |  |  | Months Quit | 0.00018 | 0.00104 | 0.03 | 0.8605 | 1.000 |
|  |  |  |  |  |  |  |  |  |
| 7A. | 8454.28 | 8013.55 | PM Coarse | -0.03754 | 0.09844 | 0.14 | 0.7030 | 0.963 |
|  |  |  | Pack-Years | 0.07235 | 0.01397 | 26.82 | <0.0001 | 1.075 |
|  |  |  | Years Smoked | 0.03401 | 0.00689 | 24.38 | <0.0001 | 1.035 |
|  |  |  | Months Quit | 0.00022 | 0.00103 | 0.04 | 0.8315 | 1.000 |
|  |  |  | Pack-Yr-x-Age (Yrs) | -0.00072 | 0.00020 | 13.67 | 0.0002 | 0.999 |
|  |  |  |  |  |  |  |  |  |
| 7B. | 8454.28 | 8014.20 | PM Coarse | -0.03611 | 0.09841 | 0.13 | 0.7137 | 0.965 |
|  |  |  | Pack-Years | 0.20556 | 0.11525 | 3.18 | 0.0745 | 1.228 |
|  |  |  | Years Smoked | 0.03366 | 0.00690 | 23.80 | <0.0001 | 1.034 |
|  |  |  | Months Quit | 0.00020 | 0.00103 | 0.04 | 0.8489 | 1.000 |
|  |  |  | Pack-Yr-x-Age (Yrs) | -0.00457 | 0.00331 | 1.91 | 0.1672 | 0.995 |
|  |  |  | Pack-Yr-x-Age Squared | 0.00003 | 0.00002 | 1.35 | 0.2443 | 1.000 |
|  |  |  |  |  |  |  |  |  |
| 7C. | 8454.28 | 8015.84 | PM Coarse | -0.03702 | 0.09840 | 0.14 | 0.7067 | 0.964 |
|  |  |  | Pack-Years | -0.31725 | 0.88503 | 0.13 | 0.7200 | 0.728 |
|  |  |  | Years Smoked | 0.03363 | 0.00690 | 23.73 | <0.0001 | 1.034 |
|  |  |  | Months Quit | 0.00019 | 0.00103 | 0.03 | 0.8557 | 1.000 |
|  |  |  | Pack-Yr-x-Age (Yrs) | 0.01840 | 0.03870 | 0.23 | 0.6344 | 1.019 |
|  |  |  | Pack-Yr-x-Age Squared | -0.00031 | 0.00056 | 0.30 | 0.5850 | 1.000 |
|  |  |  | Pack-Yr-x-Age Cubed | 1.60e-6 | 2.69e-6 | 0.35 | 0.5514 | 1.000 |
|  |  |  |  |  |  |  |  |  |
| 8. | 8454.28 | 8046.11 | PM Coarse | -0.03747 | 0.09817 | 0.15 | 0.7027 | 0.963 |
|  |  |  | Pack-Years | -0.30888 | 0.86635 | 0.13 | 0.7214 | 0.734 |
|  |  |  | Pack-Yr-x-Age (Yrs) | 0.01869 | 0.03787 | 0.24 | 0.6216 | 1.019 |
|  |  |  | Pack-Yr-x-Age Squared | -0.00032 | 0.00055 | 0.33 | 0.5634 | 1.000 |
|  |  |  | Pack-Yr-x-Age Cubed | 1.68e-6 | 2.63e-6 | 0.41 | 0.5226 | 1.000 |

**Former Smokers Only (Quit for ≥ 10 Years), Based on Pack-Years of Smoking**

39,575 subjects, 259,080 subject-cycle records, 654 events (0.3%), 502,399.8 person-years of follow-up (records with unknown pack-years, unknown years of smoking, or unknown time since quitting deleted). **Each model includes stratification by age-month and cycle, also with region as a covariate.**

|  | **AIC w/o Cov.** | **AIC w/ Cov.** | **Covariates** | **Est.** | **Std. Err.** | **Χ2** | **P(Χ2)** | **HR** |
| --- | --- | --- | --- | --- | --- | --- | --- | --- |
| 1. | 5845.55 | 5850.01 | PM Coarse | 0.14353 | 0.12516 | 1.31 | 0.2515 | 1.154 |
|  |  |  |  |  |  |  |  |  |
| 2. | 5845.55 | 5459.11 | PM Coarse | 0.12779 | 0.12650 | 1.02 | 0.3124 | 1.136 |
|  |  |  | Pack-Years | 0.03634 | 0.00169 | 461.87 | <0.0001 | 1.037 |
|  |  |  |  |  |  |  |  |  |
| 3. | 5845.55 | 5412.71 | PM Coarse | 0.12043 | 0.12711 | 0.90 | 0.3434 | 1.128 |
|  |  |  | Pack-Years | 0.02614 | 0.00224 | 135.83 | <0.0001 | 1.026 |
|  |  |  | Years Smoked | 0.03263 | 0.00470 | 48.27 | <0.0001 | 1.033 |
|  |  |  |  |  |  |  |  |  |
| 4. | 5845.55 | 5413.92 | PM Coarse | 0.11987 | 0.12706 | 0.89 | 0.3455 | 1.127 |
|  |  |  | Pack-Years | 0.02625 | 0.00225 | 136.41 | <0.0001 | 1.027 |
|  |  |  | Years Smoked | 0.02518 | 0.00947 | 7.07 | 0.0079 | 1.025 |
|  |  |  | Months Quit | -0.00069 | 0.00077 | 0.81 | 0.3677 | 0.999 |
|  |  |  |  |  |  |  |  |  |
| 5A. | 5845.55 | 5410.10 | PM Coarse | 0.11246 | 0.12716 | 0.78 | 0.3765 | 1.119 |
|  |  |  | Pack-Years | 0.08034 | 0.02236 | 12.91 | 0.0003 | 1.084 |
|  |  |  | Years Smoked | 0.02385 | 0.00943 | 6.40 | 0.0114 | 1.024 |
|  |  |  | Months Quit | -0.00076 | 0.00077 | 0.99 | 0.3201 | 0.999 |
|  |  |  | Pack-Yr-x-Age (Yrs) | -0.00072 | 0.00030 | 5.88 | 0.0153 | 0.999 |
|  |  |  |  |  |  |  |  |  |
| 5B. | 5845.55 | 5412.02 | PM Coarse | 0.11290 | 0.12715 | 0.79 | 0.3746 | 1.120 |
|  |  |  | Pack-Years | 0.13549 | 0.19857 | 0.46 | 0.4950 | 1.145 |
|  |  |  | Years Smoked | 0.02380 | 0.00943 | 6.37 | 0.0116 | 1.024 |
|  |  |  | Months Quit | -0.00076 | 0.00077 | 0.98 | 0.3208 | 0.999 |
|  |  |  | Pack-Yr-x-Age (Yrs) | -0.00225 | 0.00546 | 0.17 | 0.6806 | 0.998 |
|  |  |  | Pack-Yr-x-Age Squared | 0.00001 | 0.00004 | 0.08 | 0.7799 | 1.000 |
|  |  |  |  |  |  |  |  |  |
| 5C. | 5845.55 | 5413.82 | PM Coarse | 0.11399 | 0.12711 | 0.80 | 0.3698 | 1.121 |
|  |  |  | Pack-Years | -0.48852 | 1.40813 | 0.12 | 0.7286 | 0.614 |
|  |  |  | Years Smoked | 0.02375 | 0.00943 | 6.34 | 0.0118 | 1.024 |
|  |  |  | Months Quit | -0.00076 | 0.00077 | 0.99 | 0.3190 | 0.999 |
|  |  |  | Pack-Yr-x-Age (Yrs) | 0.02430 | 0.05952 | 0.17 | 0.6831 | 1.025 |
|  |  |  | Pack-Yr-x-Age Squared | -0.00036 | 0.00083 | 0.19 | 0.6634 | 1.000 |
|  |  |  | Pack-Yr-x-Age Cubed | 1.74e-6 | 3.88e-6 | 0.20 | 0.6539 | 1.000 |
|  |  |  |  |  |  |  |  |  |
| 6. | 5845.55 | 5457.22 | PM Coarse | 0.12164 | 0.12658 | 0.92 | 0.3366 | 1.129 |
|  |  |  | Pack-Years | -0.48843 | 1.36111 | 0.13 | 0.7197 | 0.614 |
|  |  |  | Pack-Yr-x-Age (Yrs) | 0.02568 | 0.05750 | 0.20 | 0.6551 | 1.026 |
|  |  |  | Pack-Yr-x-Age Squared | -0.00039 | 0.00080 | 0.24 | 0.6242 | 1.000 |
|  |  |  | Pack-Yr-x-Age Cubed | 1.94e-6 | 3.75e-6 | 0.27 | 0.6048 | 1.000 |

**Full Cohort, Based on Average Packs / Year**

97,303 subjects, 721,127 subject-cycle records, 1,992 events (0.3%), 1,402,829.1 person-years of follow-up (records with unknown pack-years, unknown years of smoking, or unknown time since quitting deleted). **Each model includes stratification by age-month and cycle, also with region as a covariate.**

|  | **AIC w/o Cov.** | **AIC w/ Cov.** | **Covariates** | **Est.** | **Std. Err.** | **Χ2** | **P(Χ2)** | **HR** |
| --- | --- | --- | --- | --- | --- | --- | --- | --- |
| 1. | 21810.08 | 21794.68 | PM Coarse | 0.08827 | 0.07113 | 1.54 | 0.2146 | 1.092 |
|  |  |  |  |  |  |  |  |  |
| 2. | 21810.08 | 19734.47 | PM Coarse | 0.06232 | 0.07202 | 0.75 | 0.3869 | 1.064 |
|  |  |  | Current v Never | 3.25390 | 0.08446 | 1484.26 | <0.0001 | 25.891 |
|  |  |  | Former v Never | 1.86282 | 0.08076 | 532.026 | <0.0001 | 6.442 |
|  |  |  |  |  |  |  |  |  |
| 4. | 21810.08 | 18872.02 | PM Coarse | 0.02690 | 0.07246 | 0.14 | 0.7105 | 1.027 |
|  |  |  | Current v Never | -0.30147 | 0.15980 | 3.56 | 0.0592 | 0.740 |
|  |  |  | Former v Never | -0.38241 | 0.12932 | 8.74 | 0.0031 | 0.682 |
|  |  |  | Average Packs | 1.00707 | 0.13991 | 51.81 | <0.0001 | 2.738 |
|  |  |  | Years Smoked | 0.06870 | 0.00252 | 741.20 | <0.0001 | 1.071 |
|  |  |  |  |  |  |  |  |  |
| 5. | 21810.08 | 18870.21 | PM Coarse | 0.02649 | 0.07243 | 0.13 | 0.7145 | 1.027 |
|  |  |  | Current v Never | 0.08214 | 0.25021 | 0.11 | 0.7427 | 1.086 |
|  |  |  | Former v Never | 0.03302 | 0.24602 | 0.02 | 0.8924 | 1.034 |
|  |  |  | Average Packs | 1.03464 | 0.14025 | 54.42 | <0.0001 | 2.814 |
|  |  |  | Years Smoked | 0.06099 | 0.00461 | 174.94 | <0.0001 | 1.063 |
|  |  |  | Months Quit | -0.00083 | 0.00042 | 3.90 | 0.0484 | 0.999 |
|  |  |  |  |  |  |  |  |  |
| 6. | 21810.08 | 18866.84 | PM Coarse | 0.02652 | 0.07243 | 0.13 | 0.7143 | 1.027 |
|  |  |  | Average Packs | 1.06074 | 0.13424 | 62.43 | <0.0001 | 2.889 |
|  |  |  | Years Smoked | 0.06212 | 0.00153 | 1637.65 | <0.0001 | 1.064 |
|  |  |  | Months Quit | -0.00085 | 0.00020 | 17.26 | <0.0001 | 0.999 |
|  |  |  |  |  |  |  |  |  |
| 7A. | 21810.08 | 18868.49 | PM Coarse | 0.02636 | 0.07243 | 0.13 | 0.7160 | 1.027 |
|  |  |  | Average Packs | 0.45426 | 1.02983 | 0.19 | 0.6591 | 1.575 |
|  |  |  | Years Smoked | 0.06208 | 0.00154 | 1632.93 | <0.0001 | 1.064 |
|  |  |  | Months Quit | -0.00086 | 0.00020 | 17.58 | <0.0001 | 0.999 |
|  |  |  | Ave Pck-x-Age (Yrs) | 0.00894 | 0.01495 | 0.36 | 0.5499 | 1.009 |
|  |  |  |  |  |  |  |  |  |
| 7B. | 21810.08 | 18869.17 | PM Coarse | 0.02685 | 0.07244 | 0.14 | 0.7312 | 1.016 |
|  |  |  | Average Packs | 3.24429 | 2.63097 | 1.52 | 0.6320 | 5.016 |
|  |  |  | Years Smoked | 0.06206 | 0.00154 | 1631.52 | <0.0001 | 1.064 |
|  |  |  | Months Quit | -0.00086 | 0.00020 | 17.67 | <0.0001 | 0.999 |
|  |  |  | Ave Pck-x-Age (Yrs) | -0.07693 | 0.07623 | 1.02 | 0.2110 | 0.903 |
|  |  |  | Ave Pck-x-Age Squared | 0.00065 | 0.00057 | 1.32 | 0.2577 | 1.002 |
|  |  |  |  |  |  |  |  |  |
| 7C. | 21810.08 | 18870.40 | PM Coarse | 0.02685 | 0.07243 | 0.14 | 0.7108 | 1.027 |
|  |  |  | Average Packs | 1.61525 | 3.36712 | 0.23 | 0.6314 | 5.029 |
|  |  |  | Years Smoked | 0.06206 | 0.00154 | 1630.84 | <0.0001 | 1.064 |
|  |  |  | Months Quit | -0.00086 | 0.00020 | 17.69 | <0.0001 | 0.999 |
|  |  |  | Ave Pck-x-Age (Yrs) | -0.10254 | 0.08199 | 1.56 | 0.2111 | 0.903 |
|  |  |  | Ave Pck-x-Age Squared | 0.00246 | 0.00217 | 1.28 | 0.2581 | 1.002 |
|  |  |  | Ave Pck-x-Age Cubed | -0.00001 | 0.00002 | 0.73 | 0.3936 | 1.000 |
|  |  |  |  |  |  |  |  |  |
| 8. | 21810.08 | 18886.15 | PM Coarse | 0.02982 | 0.07245 | 0.17 | 0.6807 | 1.030 |
|  |  |  | Average Packs | 1.35548 | 3.57448 | 0.14 | 0.7045 | 3.879 |
|  |  |  | Years Smoked | 0.06552 | 0.00139 | 2215.27 | <0.0001 | 1.068 |
|  |  |  | Ave Pck-x-Age (Yrs) | -0.10247 | 0.08132 | 1.59 | 0.2076 | 0.903 |
|  |  |  | Ave Pck-x-Age Squared | 0.00254 | 0.00231 | 1.20 | 0.2726 | 1.003 |
|  |  |  | Ave Pck-x-Age Cubed | -0.00002 | 0.00002 | 0.71 | 0.3992 | 1.000 |

**Never Smokers**

44,245 subjects, 337,374 subject-cycle records, 179 events (0.1%), 659,099.5 person-years of follow-up.

**Each model includes stratification by age-month and cycle, also with region as a covariate.**

|  | **AIC w/o Cov.** | **AIC w/ Cov.** | **Covariates** | **Est.** | **Std. Err.** | **Χ2** | **P(Χ2)** | **HR** |
| --- | --- | --- | --- | --- | --- | --- | --- | --- |
| 1. | 1667.02 | 1668.18 | PM Coarse | 0.09761 | 0.21155 | 0.21 | 0.6445 | 1.103 |
|  |  |  |  |  |  |  |  |  |

**Never or Former Smokers (Quit for ≥ 10 Years), Based on Average Packs / Year**

83,819 subjects, 596,454 subject-cycle records, 833 events (0.1%), 1,161,499.3 person-years of follow-up (records with unknown time since quitting deleted). **Each model includes stratification by age-month and cycle, also with region as a covariate.**

|  | **AIC w/o Cov.** | **AIC w/ Cov.** | **Covariates** | **Est.** | **Std. Err.** | **Χ2** | **P(Χ2)** | **HR** |
| --- | --- | --- | --- | --- | --- | --- | --- | --- |
| 1. | 8778.12 | 8778.12 | PM Coarse | 0.09265 | 0.07044 | 1.73 | 0.1884 | 1.097 |
|  |  |  |  |  |  |  |  |  |
| 2. | 8778.12 | 8382.31 | PM Coarse | 0.13243 | 0.10716 | 1.53 | 0.2165 | 1.142 |
|  |  |  | Former v Never | 1.51637 | 0.08475 | 320.17 | <0.0001 | 4.556 |
|  |  |  |  |  |  |  |  |  |
| 4. | 8778.12 | 8068.82 | PM Coarse | 0.11376 | 0.10866 | 1.10 | 0.2951 | 1.120 |
|  |  |  | Former v Never | -0.26170 | 0.16190 | 2.61 | 0.1060 | 0.770 |
|  |  |  | Average Packs | 0.61665 | 0.19822 | 9.68 | 0.0019 | 1.853 |
|  |  |  | Years Smoked | 0.06497 | 0.00399 | 265.20 | <0.0001 | 1.067 |
|  |  |  |  |  |  |  |  |  |
| 5A. | 8778.12 | 8067.99 | PM Coarse | 0.11394 | 0.10865 | 1.10 | 0.2943 | 1.121 |
|  |  |  | Former v Never | 0.32070 | 0.37670 | 0.72 | 0.3946 | 1.378 |
|  |  |  | Average Packs | 0.62897 | 0.19848 | 10.04 | 0.0015 | 1.876 |
|  |  |  | Years Smoked | 0.05480 | 0.00713 | 59.13 | <0.0001 | 1.056 |
|  |  |  | Months Quit | -0.00106 | 0.00062 | 2.90 | 0.0887 | 0.999 |
|  |  |  |  |  |  |  |  |  |
| 5B. | 8778.12 | 8070.90 | PM Coarse | 0.11511 | 0.10872 | 1.12 | 0.2897 | 1.122 |
|  |  |  | Former v Never | 0.35402 | 0.37998 | 0.87 | 0.3515 | 1.425 |
|  |  |  | Average Packs | 4.95195 | 4.58290 | 1.17 | 0.2799 | 141.451 |
|  |  |  | Years Smoked | 0.05414 | 0.00718 | 56.83 | <0.0001 | 1.056 |
|  |  |  | Months Quit | -0.00113 | 0.00063 | 3.17 | 0.0749 | 0.999 |
|  |  |  | Ave Pck-x-Age (Yrs) | -0.22935 | 0.13676 | 2.81 | 0.0935 | 0.795 |
|  |  |  | Ave Pck-x-Age Squared | 0.00374 | 0.00299 | 1.56 | 0.2114 | 1.004 |
|  |  |  | Ave Pck-x-Age Cubed | -0.00002 | 0.00002 | 0.68 | 0.4095 | 1.000 |
|  |  |  |  |  |  |  |  |  |
| 6. | 8778.12 | 8066.71 | PM Coarse | 0.11373 | 0.10867 | 1.09 | 0.2953 | 1.120 |
|  |  |  | Average Packs | 0.66504 | 0.19155 | 12.05 | 0.0005 | 1.945 |
|  |  |  | Years Smoked | 0.06057 | 0.00231 | 688.44 | <0.0001 | 1.062 |
|  |  |  | Months Quit | -0.00058 | 0.00027 | 4.67 | 0.0307 | 0.999 |
|  |  |  |  |  |  |  |  |  |
| 7A. | 8778.12 | 8068.69 | PM Coarse | 0.11375 | 0.10867 | 1.09 | 0.2952 | 1.120 |
|  |  |  | Average Packs | 0.49339 | 1.36224 | 0.13 | 0.7172 | 1.638 |
|  |  |  | Years Smoked | 0.06055 | 0.00231 | 688.54 | <0.0001 | 1.062 |
|  |  |  | Months Quit | -0.00059 | 0.00027 | 4.66 | 0.0309 | 0.999 |
|  |  |  | Ave Pck-x-Age (Yrs) | 0.00251 | 0.01966 | 0.02 | 0.8985 | 1.003 |
|  |  |  |  |  |  |  |  |  |
| 7B. | 8778.12 | 8068.49 | PM Coarse | 0.11448 | 0.10874 | 1.11 | 0.2924 | 1.121 |
|  |  |  | Average Packs | 6.27728 | 4.06998 | 2.38 | 0.1230 | 532.337 |
|  |  |  | Years Smoked | 0.06051 | 0.00231 | 687.21 | <0.0001 | 1.062 |
|  |  |  | Months Quit | -0.00059 | 0.00027 | 4.70 | 0.0301 | 0.999 |
|  |  |  | Ave Pck-x-Age (Yrs) | -0.17374 | 0.11934 | 2.11 | 0.1455 | 0.841 |
|  |  |  | Ave Pck-x-Age Squared | 0.00132 | 0.00088 | 2.24 | 0.1348 | 1.001 |
|  |  |  |  |  |  |  |  |  |
| 7C. | 8778.12 | 8069.76 | PM Coarse | 0.11486 | 0.10874 | 1.11 | 0.2908 | 1.122 |
|  |  |  | Average Packs | 5.11978 | 4.53155 | 1.28 | 0.2568 | 167.298 |
|  |  |  | Years Smoked | 0.06049 | 0.00231 | 686.26 | <0.0001 | 1.062 |
|  |  |  | Months Quit | -0.00059 | 0.00027 | 4.78 | 0.0287 | 0.999 |
|  |  |  | Ave Pck-x-Age (Yrs) | -0.22952 | 0.13701 | 2.81 | 0.0939 | 0.795 |
|  |  |  | Ave Pck-x-Age Squared | 0.00371 | 0.00297 | 1.56 | 0.2119 | 1.004 |
|  |  |  | Ave Pck-x-Age Cubed | -0.00002 | 0.00002 | 0.69 | 0.4061 | 1.000 |
|  |  |  |  |  |  |  |  |  |
| 8. | 8778.12 | 8072.60 | PM Coarse | 0.11541 | 0.10867 | 1.13 | 0.2882 | 1.122 |
|  |  |  | Average Packs | 5.04183 | 4.67167 | 1.16 | 0.2805 | 154.753 |
|  |  |  | Years Smoked | 0.05966 | 0.00232 | 663.27 | <0.0001 | 1.061 |
|  |  |  | Ave Pck-x-Age (Yrs) | -0.22801 | 0.13570 | 2.82 | 0.0929 | 0.796 |
|  |  |  | Ave Pck-x-Age Squared | 0.00365 | 0.00307 | 1.41 | 0.2345 | 1.004 |
|  |  |  | Ave Pck-x-Age Cubed | -0.00002 | 0.00002 | 0.61 | 0.4332 | 1.000 |

**Current or Former Smokers (Quit for < 10 Years), Based on Average Packs / Year**

25,767 subjects, 124,673 subject-cycle records, 1,159 events (0.9%), 241,329.8 person-years of follow-up (records with unknown pack-years, unknown years of smoking, or unknown time since quitting deleted).

**Each model includes stratification by age-month and cycle, also with region as a covariate.**

|  | **AIC w/o Cov.** | **AIC w/ Cov.** | **Covariates** | **Est.** | **Std. Err.** | **Χ2** | **P(Χ2)** | **HR** |
| --- | --- | --- | --- | --- | --- | --- | --- | --- |
| 1. | 8454.28 | 8450.38 | PM Coarse | -0.01705 | 0.09824 | 0.03 | 0.8622 | 0.983 |
|  |  |  |  |  |  |  |  |  |
| 2. | 8454.28 | 8397.10 | PM Coarse | -0.01938 | 0.09843 | 0.04 | 0.8439 | 0.981 |
|  |  |  | Current v Former | 0.45282 | 0.06170 | 53.86 | <0.0001 | 1.573 |
|  |  |  |  |  |  |  |  |  |
| 3. | 8454.28 | 8151.32 | PM10 | -0.03108 | 0.09881 | 0.10 | 0.7531 | 0.969 |
|  |  |  | Current v Former | -0.04014 | 0.07056 | 0.32 | 0.5694 | 0.961 |
|  |  |  | Average Packs | 3.62811 | 0.28171 | 165.86 | <0.0001 | 37.642 |
|  |  |  | Years Smoked | 0.08462 | 0.00652 | 168.25 | <0.0001 | 1.088 |
|  |  |  |  |  |  |  |  |  |
| 4. | 8454.28 | 8149.64 | PM Coarse | -0.03118 | 0.09882 | 0.10 | 0.7524 | 0.969 |
|  |  |  | Average Packs | 3.57939 | 0.26773 | 178.74 | <0.0001 | 35.852 |
|  |  |  | Years Smoked | 0.08285 | 0.00570 | 211.03 | <0.0001 | 1.086 |
|  |  |  |  |  |  |  |  |  |
| 5. | 8454.28 | 8149.39 | PM Coarse | -0.03339 | 0.09881 | 0.11 | 0.7345 | 0.967 |
|  |  |  | Current v Former | 0.10327 | 0.10280 | 1.01 | 0.3151 | 1.109 |
|  |  |  | Average Packs | 3.74413 | 0.29044 | 166.18 | <0.0001 | 42.272 |
|  |  |  | Years Smoked | 0.08964 | 0.00713 | 157.94 | <0.0001 | 1.094 |
|  |  |  | Months Quit | 0.00301 | 0.00152 | 3.93 | 0.0474 | 1.003 |
|  |  |  |  |  |  |  |  |  |
| 6. | 8454.28 | 8148.41 | PM Coarse | -0.03245 | 0.09880 | 0.11 | 0.7426 | 0.968 |
|  |  |  | Average Packs | 3.76432 | 0.28984 | 168.68 | <0.0001 | 43.134 |
|  |  |  | Years Smoked | 0.09009 | 0.00712 | 160.07 | <0.0001 | 1.094 |
|  |  |  | Months Quit | 0.00192 | 0.00106 | 3.25 | 0.0713 | 1.002 |
|  |  |  |  |  |  |  |  |  |
| 7A. | 8454.28 | 8150.26 | PM Coarse | -0.03379 | 0.09899 | 0.12 | 0.7326 | 0.967 |
|  |  |  | Average Packs | 2.74744 | 2.58385 | 1.13 | 0.2876 | 15.603 |
|  |  |  | Years Smoked | 0.09031 | 0.00715 | 159.67 | <0.0001 | 1.095 |
|  |  |  | Months Quit | 0.00194 | 0.00106 | 3.32 | 0.0685 | 1.002 |
|  |  |  | Ave Pck-x-Age (Yrs) | 0.01504 | 0.03790 | 0.16 | 0.6915 | 1.015 |
|  |  |  |  |  |  |  |  |  |
| 7B. | 8454.28 | 8151.67 | PM Coarse | -0.03274 | 0.09891 | 0.11 | 0.7406 | 0.968 |
|  |  |  | Average Packs | 4.83983 | 3.76259 | 1.65 | 0.1983 | 126.448 |
|  |  |  | Years Smoked | 0.09048 | 0.00716 | 159.83 | <0.0001 | 1.095 |
|  |  |  | Months Quit | 0.00197 | 0.00106 | 3.41 | 0.0646 | 1.002 |
|  |  |  | Ave Pck-x-Age (Yrs) | -0.05796 | 0.10258 | 0.32 | 0.5721 | 0.944 |
|  |  |  | Ave Pck-x-Age Squared | 0.00062 | 0.00080 | 0.59 | 0.4434 | 1.001 |
|  |  |  |  |  |  |  |  |  |
| 7C. | 8454.28 | 8152.11 | PM Coarse | -0.03240 | 0.09898 | 0.11 | 0.7434 | 0.968 |
|  |  |  | Average Packs | 15.46753 | 9.12692 | 2.87 | 0.0901 | >999 |
|  |  |  | Years Smoked | 0.09048 | 0.00714 | 160.71 | <0.0001 | 1.095 |
|  |  |  | Months Quit | 0.00194 | 0.00106 | 3.33 | 0.0679 | 1.002 |
|  |  |  | Ave Pck-x-Age (Yrs) | -0.04262 | 0.10330 | 0.17 | 0.6799 | 0.958 |
|  |  |  | Ave Pck-x-Age Squared | -0.00684 | 0.00591 | 1.34 | 0.2472 | 0.993 |
|  |  |  | Ave Pck-x-Age Cubed | 0.00007 | 0.00006 | 1.62 | 0.2024 | 1.000 |
|  |  |  |  |  |  |  |  |  |

**Former Smokers Only (Quit for ≥ 10 Years), Based on Average Packs / Year**

39,575 subjects, 259,080 subject-cycle records, 654 events (0.3%), 502,399.8 person-years of follow-up (records with unknown time since quitting deleted). **Each model includes stratification by age-month and cycle, also with region as a covariate.**

|  | **AIC w/o Cov.** | **AIC w/ Cov.** | **Covariates** | **Est.** | **Std. Err.** | **Χ2** | **P(Χ2)** | **HR** |
| --- | --- | --- | --- | --- | --- | --- | --- | --- |
| 1. | 5845.55 | 5850.01 | PM Coarse | 0.14353 | 0.12516 | 1.31 | 0.2515 | 1.154 |
|  |  |  |  |  |  |  |  |  |
| 2. | 5845.55 | 5533.49 | PM Coarse | 0.12469 | 0.12765 | 0.95 | 0.3287 | 1.133 |
|  |  |  | Average Packs | 0.61355 | 0.19991 | 9.42 | 0.0021 | 1.847 |
|  |  |  | Years Smoked | 0.06723 | 0.00415 | 261.91 | <0.0001 | 1.070 |
|  |  |  |  |  |  |  |  |  |
| 3. | 5845.55 | 5535.25 | PM Coarse | 0.12458 | 0.12764 | 0.95 | 0.3291 | 1.133 |
|  |  |  | Average Packs | 0.61795 | 0.19998 | 9.55 | 0.0020 | 1.855 |
|  |  |  | Years Smoked | 0.06328 | 0.00903 | 49.11 | <0.0001 | 1.065 |
|  |  |  | Months Quit | -0.00038 | 0.00077 | 0.24 | 0.6234 | 1.000 |
|  |  |  |  |  |  |  |  |  |
| 4A. | 5845.55 | 5536.69 | PM Coarse | 0.12475 | 0.12763 | 0.95 | 0.3284 | 1.133 |
|  |  |  | Average Packs | -0.52246 | 1.56565 | 0.11 | 0.7386 | 0.593 |
|  |  |  | Years Smoked | 0.06367 | 0.00903 | 49.71 | <0.0001 | 1.066 |
|  |  |  | Months Quit | -0.00038 | 0.00077 | 0.24 | 0.6225 | 1.000 |
|  |  |  | Ave Pck-x-Age (Yrs) | 0.01648 | 0.02220 | 0.55 | 0.4580 | 1.017 |
|  |  |  |  |  |  |  |  |  |
| 4B. | 5845.55 | 5535.49 | PM Coarse | 0.12541 | 0.12781 | 0.96 | 0.3265 | 1.134 |
|  |  |  | Average Packs | 6.60739 | 4.20433 | 2.47 | 0.1161 | 740.551 |
|  |  |  | Years Smoked | 0.06367 | 0.00903 | 49.73 | <0.0001 | 1.066 |
|  |  |  | Months Quit | -0.00037 | 0.00077 | 0.23 | 0.6305 | 1.000 |
|  |  |  | Ave Pck-x-Age (Yrs) | -0.20036 | 0.12191 | 2.70 | 0.1003 | 0.818 |
|  |  |  | Ave Pck-x-Age Squared | 0.00162 | 0.00090 | 3.26 | 0.0709 | 1.002 |
|  |  |  |  |  |  |  |  |  |
| 4C. | 5845.55 | 5537.34 | PM Coarse | 0.12570 | 0.12781 | 0.97 | 0.3254 | 1.134 |
|  |  |  | Average Packs | 5.99017 | 4.62251 | 1.68 | 0.1950 | 399.484 |
|  |  |  | Years Smoked | 0.06366 | 0.00903 | 49.75 | <0.0001 | 1.066 |
|  |  |  | Months Quit | -0.00037 | 0.00077 | 0.24 | 0.6254 | 1.000 |
|  |  |  | Ave Pck-x-Age (Yrs) | -0.22421 | 0.13746 | 2.66 | 0.1029 | 0.799 |
|  |  |  | Yrs Smk-x-Age Squared | 0.00271 | 0.00302 | 0.81 | 0.3689 | 1.003 |
|  |  |  | Yrs Smk-x-Age Cubed | -8.74 e-6 | 0.00002 | 0.14 | 0.7068 | 1.000 |
|  |  |  |  |  |  |  |  |  |


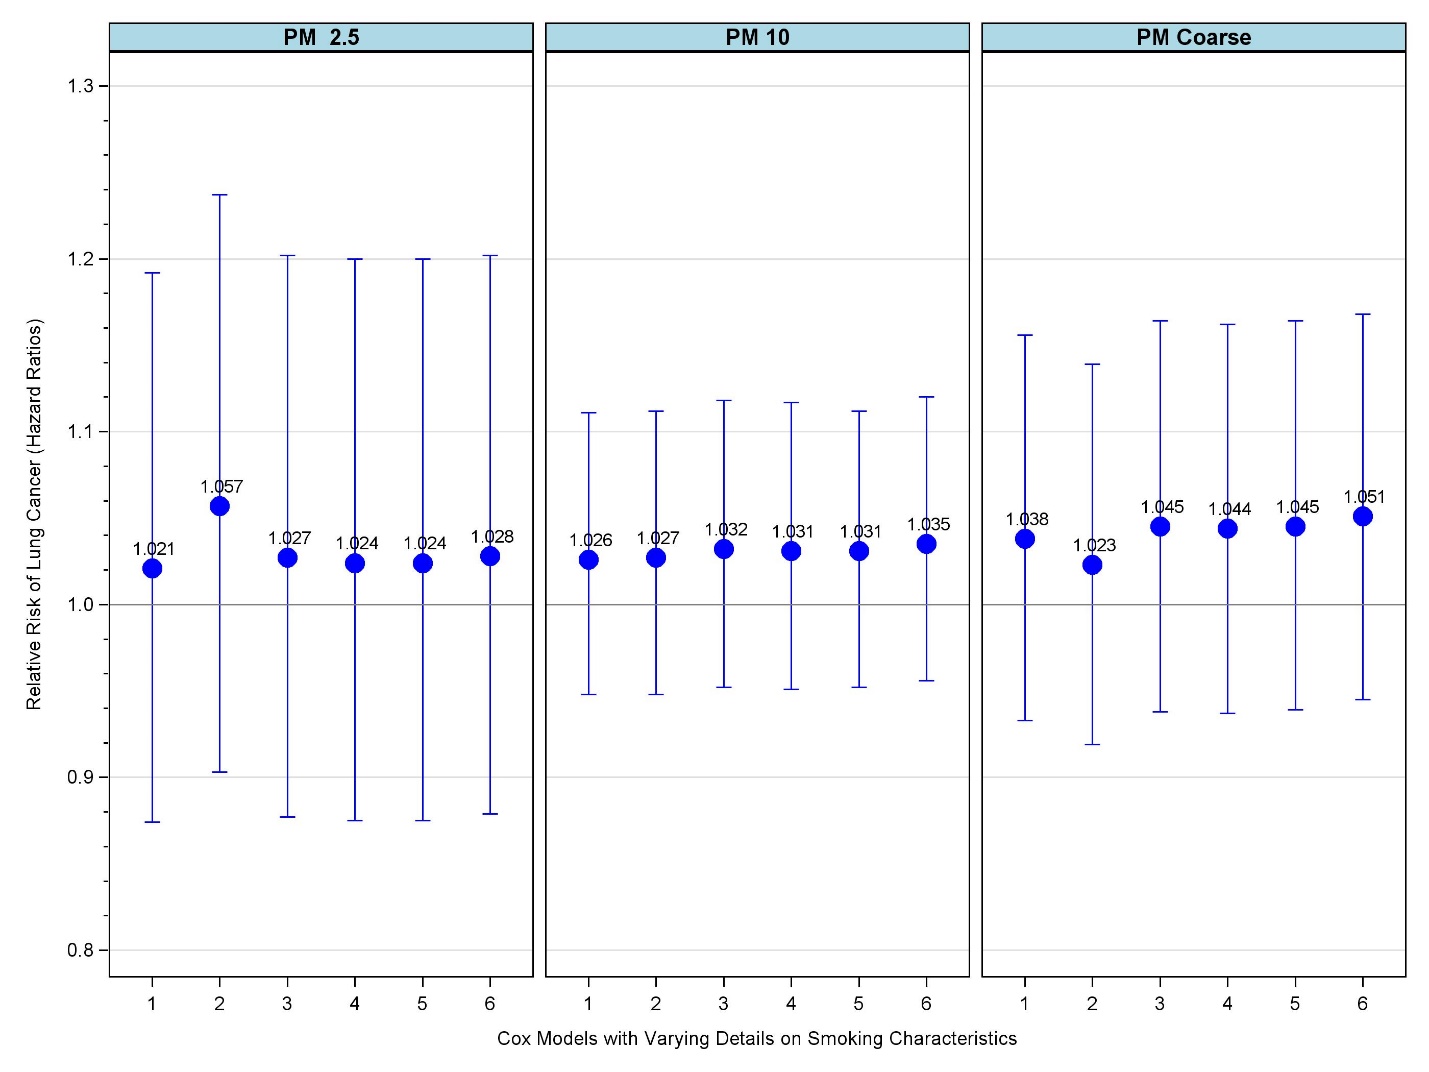


**References**

Akaike H. A new look at the statistical model identification. IEEE Transactions on Automatic Control 1974;19(6):716-723.

Beelen R, Raaschou-Nielsen O, Stafoggia M, et al. Effects of long-term exposure to air pollution on natural-cause mortality: an analysis of 22 European cohorts within the multicentre ESCAPE project. Lancet 2014;383(9919):785-795.

Boffetta P, La Vecchia C, Moolgavkar S. Chronic Effects of Air Pollution are Probably Overestimated. Risk Anal 2015;35(5):766-769.

Brown CC, Chu KC. Implications of the multistage theory of carcinogenesis applied to occupational arsenic exposure. J Natl Cancer Inst 1983;70(3):455-463.

Burns DM, Shanks TG, Choi W, Thun MJ, Heath CW, Jr., Garfinkel L, 1997. Chapter 3. The American Cancer Society Cancer Prevention Study I: 12-year followup of 1 million men and women in: Burns DM, Garfinkel L, Samet JM (Eds.), Monograph 8: Changes in Cigarette-Related Disease Risks and Their Implications for Prevention and Control. U.S. Department of Health and Human Services, Public Health Service, National Institutes of Health, Bethesda, MD, p. 602.

Chiuve SE, Fung TT, Rimm EB, et al. Alternative dietary indices both strongly predict risk of chronic disease. J Nutr 2012;142(6):1009-1018.

Cox DR. Regression models and life-tables. J Roy Stat Soc Ser B 1972;34(2):187-220.

Day NE, Brown CC. Multistage models and primary prevention of cancer. J Natl Cancer Inst 1980;64(4):977-989.

Dockery DW, Pope CA, 3rd, Xu X, et al. An association between air pollution and mortality in six U.S. cities. N Engl J Med 1993;329(24):1753-1759.

Hazelton WD, Clements MS, Moolgavkar SH. Multistage carcinogenesis and lung cancer mortality in three cohorts. Cancer Epidemiol Biomarkers Prev 2005;14(5):1171-1181.

Hernán MA. The hazards of hazard ratios. Epidemiology 2010;21(1):13-15.

Holford TR, Levy DT, McKay LA, et al. Patterns of birth cohort-specific smoking histories, 1965-2009. Am J Prev Med 2014b;46(2):e31-37.

Holford TR, Meza R, Warner KE, et al. Tobacco control and the reduction in smoking-related premature deaths in the United States, 1964-2012. JAMA 2014a;311(2):164-171.

IARC. IARC Monographs on the Evaluation of Carcinogenic Risks to Humans. Volume 109: Outdoor Air Pollution. International Agency for Research on Cancer (IARC), Lyon, France, 2016.

IMPROVE. Interagency Monitoring of Protected Visual Environments. Available: <http://vista.cira.colostate.edu/Improve/>. Accessed: 29 January 2020. 2019.

Kalbfleisch JD, Prentice RL. The Statistical Analysis of Failure Time Data. 2nd Edition, in: Shewhart WA, Wilks SS (Eds.), Wiley Series in Probability and Statistics. John Wiley & Sons, Inc., Hoboken, New Jersey, 2002.

Knoke JD, Shanks TG, Vaughn JW, Thun MJ, Burns DM. Lung cancer mortality is related to age in addition to duration and intensity of cigarette smoking: an analysis of CPS-I data. Cancer Epidemiol Biomarkers Prev 2004;13(6):949-957.

Laden F, Schwartz J, Speizer FE, Dockery DW. Reduction in fine particulate air pollution and mortality: Extended follow-up of the Harvard Six Cities study. Am J Respir Crit Care Med 2006;173(6):667-672.

Lubin JH, Caporaso N, Wichmann HE, Schaffrath-Rosario A, Alavanja MC. Cigarette smoking and lung cancer: modeling effect modification of total exposure and intensity. Epidemiology 2007;18(5):639-648.

Lumley T, Sheppard L. Assessing seasonal confounding and model selection bias in air pollution epidemiology using positive and negative control analyses. Environmetrics 2000;11(6):705-717.

Meza R, Hazelton WD, Colditz GA, Moolgavkar SH. Analysis of lung cancer incidence in the Nurses' Health and the Health Professionals' Follow-Up Studies using a multistage carcinogenesis model. Cancer Causes Control 2008;19(3):317-328.

Moolgavkar SH, 2014. Multistage carcinogenesis and epidemiologic studies of cancer, in: Almudevar AL, Hall WJ, Oakes D (Eds.), Modeling and Inference in Biomedical Science - In Memory of Andrei Yakovlev. Institute of Mathematical Statistics Collections Series.

Moolgavkar SH, Chang ET, Luebeck G, et al. Diesel engine exhaust and lung cancer mortality: time-related factors in exposure and risk. Risk Anal 2015;35(4):663-675.

Moolgavkar SH, Chang ET, Watson HN, Lau EC. An Assessment of the Cox Proportional Hazards Regression Model for Epidemiologic Studies. Risk Anal 2018;38(4):777-794.

Moolgavkar SH, Holford TR, Levy DT, et al. Impact of reduced tobacco smoking on lung cancer mortality in the United States during 1975-2000. J Natl Cancer Inst 2012;104(7):541-548.

National Cancer Institute. CISNET Publication Support and Modeling Resources. <https://resources.cisnet.cancer.gov/projects/>. Accessed 29 January 2020. 2018.

Peto J. That the effects of smoking should be measured in pack-years: misconceptions 4. Br J Cancer 2012;107(3):406-407.

Peto R, 1977. Epidemiology, multistage models, and short-term mutagenicity tests, in: Hiatt HH, Watson JD, Winsten JA (Eds.), Origins of Human Cancer. Book C: Human Risk Assessment. Cold Spring Harbor Laboratory, Cold Spring Harbor, NY, pp. 1403-1428.

Pope CA, 3rd, Burnett RT, Krewski D, et al. Cardiovascular mortality and exposure to airborne fine particulate matter and cigarette smoke: shape of the exposure-response relationship. Circulation 2009;120(11):941-948.

Pope CA, 3rd, Burnett RT, Thun MJ, et al. Lung cancer, cardiopulmonary mortality, and long-term exposure to fine particulate air pollution. JAMA 2002;287(9):1132-1141.

Puett RC, Hart JE, Yanosky JD, et al. Particulate matter air pollution exposure, distance to road, and incident lung cancer in the Nurses' Health Study cohort. Environ Health Perspect 2014;122(9):926-932.

Richardson DB. Lung cancer in chrysotile asbestos workers: analyses based on the two-stage clonal expansion model. Cancer Causes Control 2009;20(6):917-923.

Spengler JD, Koutrakis P, Dockery DW, Raizenne M, Speizer FE. Health effects of acid aerosols on North American children: air pollution exposures. Environ Health Perspect 1996;104(5):492-499.

Suh HH, Nishioka Y, Allen GA, Koutrakis P, Burton RM. The metropolitan acid aerosol characterization study: results from the summer 1994 Washington, D.C. field study. Environ Health Perspect 1997;105(8):826-834.

Tammemagi CM, Pinsky PF, Caporaso NE, et al. Lung cancer risk prediction: Prostate, Lung, Colorectal And Ovarian Cancer Screening Trial models and validation. J Natl Cancer Inst 2011;103(13):1058-1068.

Thomas DC. Models for exposure-time-response relationships with applications to cancer epidemiology. Annu Rev Public Health 1988;9(451-482.

Thomas DC, 2009. Statistical Models in Environmental Epidemiology. Oxford University Press, Oxford, UK.

Thomas DC. Invited commentary: is it time to retire the "pack-years" variable? Maybe not! Am J Epidemiol 2014;179(3):299-302.

U.S. EPA. Reviewing National Ambient Air Quality Standards (NAAQS): Scientific and Technical Information. Available: <https://www.epa.gov/naaqs>. Last updated: 16 October 2017. 2017.

U.S. EPA. Air Quality System (AQS). Available: <https://www.epa.gov/aqs>. Last updated: 2018 November 2. 2018.

Vlaanderen J, Portengen L, Schuz J, et al. Effect Modification of the Association of Cumulative Exposure and Cancer Risk by Intensity of Exposure and Time Since Exposure Cessation: A Flexible Method Applied to Cigarette Smoking and Lung Cancer in the SYNERGY Study. Am J Epidemiol 2014;179(3):290-298.

Weuve J, Puett RC, Schwartz J, Yanosky JD, Laden F, Grodstein F. Exposure to particulate air pollution and cognitive decline in older women. Arch Intern Med 2012;172(3):219-227.

Yanosky JD, Paciorek CJ, Laden F, et al. Spatio-temporal modeling of particulate air pollution in the conterminous United States using geographic and meteorological predictors. Environ Health 2014;13(63.

Yanosky JD, Paciorek CJ, Schwartz J, Laden F, Puett R, Suh HH. Spatio-temporal modeling of chronic PM10 exposure for the Nurses' Health Study. Atmos Environ (1994) 2008;42(18):4047-4062.

Yanosky JD, Paciorek CJ, Suh HH. Predicting chronic fine and coarse particulate exposures using spatiotemporal models for the Northeastern and Midwestern United States. Environ Health Perspect 2009;117(4):522-529.

Zeger SL, Dominici F, McDermott A, Samet JM. Mortality in the Medicare population and chronic exposure to fine particulate air pollution in urban centers (2000-2005). Environ Health Perspect 2008;116(12):1614-1619.

**Figures 1A–C. Age-related modification of cumulative pack-years in (A) the full cohort, (B) former smokers, and (C) current smokers, using fully adjusted models. Lines illustrate the hazard ratio per 10 pack-years of smoking, and shading illustrates 95% confidence intervals around the hazard ratio. Red denotes models including PM2.5 and cumulative pack-years only (with age interactions), and blue denotes models including PM2.5, cumulative pack-years (with age interactions), years of smoking, and months since cessation.**

A.
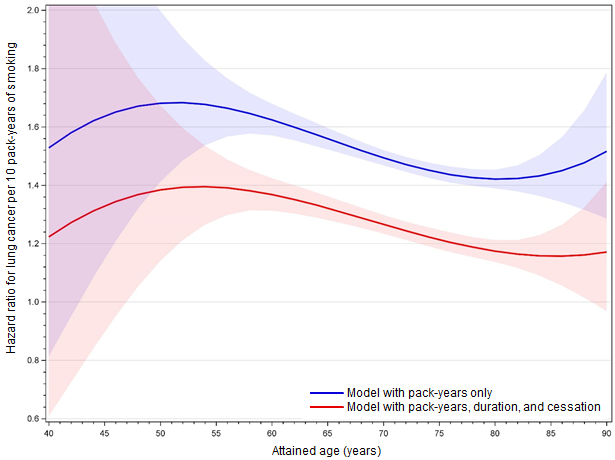


B.


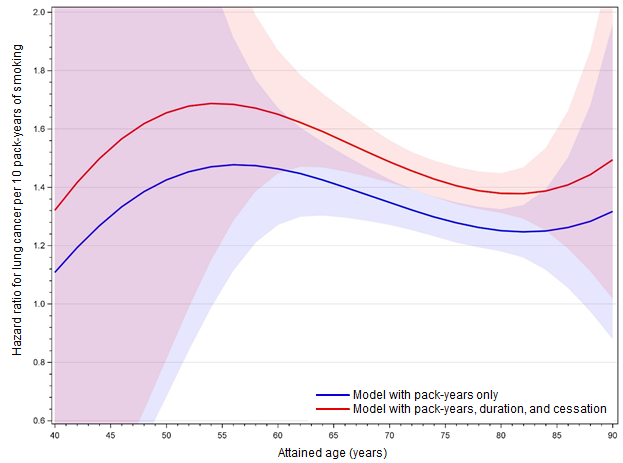


C.


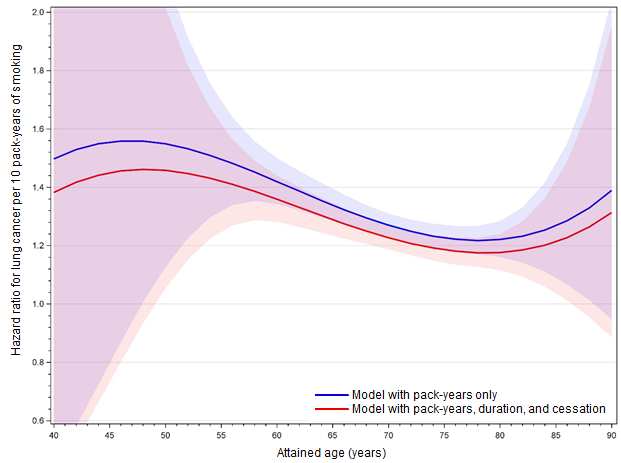


Table 1. Smoking and air pollution characteristics of the Nurses’ Health Study cohort at study baseline (1994) and during follow-up (1994–2010), stratified by smoking status at study baseline.

|  |  | Never smokers | | Former smokers | | Current smokers | | Total cohort* | |
| --- | --- | --- | --- | --- | --- | --- | --- | --- | --- |
|  |  | n = 44,245 | | n = 39,061 | | n = 12,784 | | n = 96,090 | |
|  |  | Mean | SD | Mean | SD | Mean | SD | Mean | SD |
| Age at baseline (years) | | 60.5 | 7.3 | 60.7 | 7.0 | 59.7 | 6.9 | 60.5 | 7.1 |
| … during follow-up | | 67.1 | 7.2 | 67.2 | 6.8 | 65.6 | 6.6 | 67.0 | 7.0 |
| Smoking duration at baseline (years) | | - | - | 21.0 | 12.8 | 39.0 | 8.5 | - | - |
| … during follow-up | | 0.0 | 0.1 | 21.4 | 13.0 | 43.5 | 8.7 | - | - |
| Cumulative smoking at baseline (pack-years) | | - | - | 18.8 | 17.6 | 42.2 | 20.6 | - | - |
| … during follow-up | | 0.0 | 0.0 | 19.1 | 17.8 | 46.0 | 21.9 | - | - |
| Average packs at baseline (pack-years / duration) | | - | - | 0.3 | 0.3 | 0.1 | 0.1 | - | - |
| … during follow-up | | 0.0 | 0.0 | 0.3 | 0.3 | 0.1 | 0.1 | - | - |
| Age at smoking initiation (years) | | - | - | 19.3 | 4.2 | 19.1 | 4.0 | - | - |
| Age at smoking cessation (years) | | - | - | 41.7 | 13.1 | - | - | - | - |
| Time since smoking cessation at baseline (months) | | - | - | 228.7 | 143.2 | - | - | - | - |
| PM2.5 at baseline (µg/m3) | | 15.2 | 3.3 | 15.0 | 3.2 | 15.2 | 3.1 | 15.1 | 3.2 |
| … during follow-up | | 13.2 | 2.8 | 13.0 | 2.7 | 13.4 | 2.7 | 13.2 | 2.7 |
| PM10 at baseline (µg/m3) | | 25.8 | 6.8 | 25.3 | 6.3 | 25.3 | 6.2 | 25.5 | 6.5 |
| … during follow-up | | 21.9 | 5.6 | 21.5 | 5.3 | 21.8 | 5.3 | 21.7 | 5.4 |
| PM2.5–10 at baseline (µg/m3) | | 10.6 | 5.0 | 10.3 | 4.6 | 10.1 | 4.5 | 10.4 | 4.7 |
| … during follow-up | | 8.6 | 4.1 | 8.5 | 3.8 | 8.5 | 3.8 | 8.5 | 4.0 |
|  |  | n | % | n | % | n | % | n | % |
| Geographic region at baseline | |  |  |  |  |  |  |  |  |
|  | Northeast | 21,695 | 49% | 21,204 | 54% | 7,224 | 57% | 50,123 | 52% |
|  | Midwest | 8,779 | 20% | 6,257 | 16% | 2,178 | 17% | 17,214 | 18% |
|  | West | 6,254 | 14% | 5,110 | 13% | 1,288 | 10% | 12,652 | 13% |
|  | South | 7,517 | 17% | 6,490 | 17% | 2,094 | 16% | 16,101 | 17% |
| *The total eligible cohort of 97,303 women is larger than the cohort of 96,090 with known smoking status at baseline in 1994, due to the availability of smoking data from an additional 1,213 women during follow-up. | | | | | | | | | |
| PM: particulate matter | |  |  |  |  |  |  |  |  |
| SD: standard deviation | |  |  |  |  |  |  |  |  |

Table 2. Model fit and associations between fine particulate matter and smoking characteristics with lung cancer incidence in the Nurses’ Health Study, adjusted for age, time period, and geographic region only (minimally adjusted models) or additional covariates (fully adjusted models), with various classifications of smoking based on cumulative pack-years.

|  |  |  | **Minimally adjusteda** | | | | **Fully adjustedb** | | | |
| --- | --- | --- | --- | --- | --- | --- | --- | --- | --- | --- |
| **AIC, minimally adj.** | **AIC, fully adj.** | **Covariate** | **HR** | **95% CI** | | | **HR** | **95% CI** | | |
| 21,796.11 | 21,096.64 | PM2.5 (per 10 µg/m3) | 1.02 | 0.87 | – | 1.21 | 1.07 | 0.90 | – | 1.26 |
| 19,734.78 | 19,610.10 | PM2.5 (per 10 µg/m3) | 1.06 | 0.90 | – | 1.24 | 1.06 | 0.90 | – | 1.25 |
|  |  | Current v. never smoker | 25.85 | 21.91 | – | 30.51 | 19.25 | 16.18 | – | 22.91 |
|  |  | Former v. never smoker | 6.45 | 5.50 | – | 7.55 | 5.80 | 4.93 | – | 6.82 |
| 18,721.24 | 18,705.14 | PM2.5 (per 10 µg/m3) | 1.07 | 0.91 | – | 1.27 | 1.09 | 0.92 | – | 1.28 |
|  |  | Current v. never smoker | 4.08 | 3.32 | – | 5.01 | 3.65 | 2.96 | – | 4.50 |
|  |  | Former v. never smoker | 2.62 | 2.21 | – | 3.11 | 2.52 | 2.11 | – | 3.00 |
|  |  | Smoking pack-years | 1.03 | 1.03 | – | 1.03 | 1.03 | 1.03 | – | 1.03 |
| 18,550.32 | 18,549.61 | PM2.5 (per 10 µg/m3) | 1.05 | 0.89 | – | 1.23 | 1.06 | 0.89 | – | 1.25 |
|  |  | Current v. never smoker | 1.20 | 0.91 | – | 1.59 | 1.14 | 0.86 | – | 1.51 |
|  |  | Former v. never smoker | 1.14 | 0.91 | – | 1.43 | 1.12 | 0.90 | – | 1.41 |
|  |  | Smoking pack-years | 1.02 | 1.02 | – | 1.02 | 1.02 | 1.02 | – | 1.02 |
|  |  | Smoking duration (years) | 1.04 | 1.03 | – | 1.04 | 1.04 | 1.03 | – | 1.04 |
| 18,545.49 | 18,545.16 | PM2.5 (per 10 µg/m3) | 1.05 | 0.89 | – | 1.23 | 1.06 | 0.89 | – | 1.25 |
|  |  | Current v. never smoker | 2.06 | 1.27 | – | 3.33 | 1.92 | 1.18 | – | 3.12 |
|  |  | Former v. never smoker | 2.03 | 1.26 | – | 3.28 | 1.97 | 1.22 | – | 3.19 |
|  |  | Smoking pack-years | 1.02 | 1.02 | – | 1.02 | 1.02 | 1.02 | – | 1.02 |
|  |  | Smoking duration (years) | 1.03 | 1.02 | – | 1.04 | 1.02 | 1.01 | – | 1.03 |
|  |  | Smoking cessation (months) | 1.00 | 1.00 | – | 1.00 | 1.00 | 1.00 | – | 1.00 |
| 18,549.88 | 18,548.57 | PM2.5 (per 10 µg/m3) | 1.04 | 0.89 | – | 1.23 | 1.05 | 0.89 | – | 1.25 |
|  |  | Smoking pack-years | 1.02 | 1.02 | – | 1.02 | 1.02 | 1.02 | – | 1.02 |
|  |  | Smoking duration (years) | 1.04 | 1.03 | – | 1.04 | 1.04 | 1.03 | – | 1.04 |
|  |  | Smoking cessation (months) | 1.00 | 1.00 | – | 1.00 | 1.00 | 1.00 | – | 1.00 |
| 18,509.50 | 18,491.76 | PM2.5 (per 10 µg/m3) | 1.05 | 0.89 | – | 1.24 | 1.06 | 0.90 | – | 1.25 |
|  |  | Smoking pack-years | 1.08 | 1.06 | – | 1.10 | 1.08 | 1.06 | – | 1.09 |
|  |  | Smoking duration (years) | 1.04 | 1.04 | – | 1.04 | 1.04 | 1.03 | – | 1.04 |
|  |  | Smoking cessation (months) | 1.00 | 1.00 | – | 1.00 | 1.00 | 1.00 | – | 1.00 |
|  |  | Pack-years*age | 1.00 | 1.00 | – | 1.00 | 1.00 | 1.00 | – | 1.00 |
| 18,511.49 | 18,493.76 | PM2.5 (per 10 µg/m3) | 1.05 | 0.89 | – | 1.24 | 1.06 | 0.90 | – | 1.25 |
|  |  | Smoking pack-years | 1.08 | 0.95 | – | 1.24 | 1.08 | 0.94 | – | 1.23 |
|  |  | Smoking duration (years) | 1.04 | 1.04 | – | 1.04 | 1.04 | 1.03 | – | 1.04 |
|  |  | Smoking cessation (months) | 1.00 | 1.00 | – | 1.00 | 1.00 | 1.00 | – | 1.00 |
|  |  | Pack-years*age | 1.00 | 1.00 | – | 1.00 | 1.00 | 1.00 | – | 1.00 |
|  |  | Pack-years*age squared | 1.00 | 1.00 | – | 1.00 | 1.00 | 1.00 | – | 1.00 |
| 18,512.86 | 18,495.19 | PM2.5 (per 10 µg/m3) | 1.05 | 0.89 | – | 1.24 | 1.06 | 0.90 | – | 1.25 |
|  |  | Smoking pack-years | 0.74 | 0.29 | – | 1.90 | 0.75 | 0.29 | – | 1.92 |
|  |  | Smoking duration (years) | 1.04 | 1.04 | – | 1.04 | 1.04 | 1.03 | – | 1.04 |
|  |  | Smoking cessation (months) | 1.00 | 1.00 | – | 1.00 | 1.00 | 1.00 | – | 1.00 |
|  |  | Pack-years*age | 1.02 | 0.98 | – | 1.06 | 1.02 | 0.97 | – | 1.06 |
|  |  | Pack-years*age squared | 1.00 | 1.00 | – | 1.00 | 1.00 | 1.00 | – | 1.00 |
|  |  | Pack-years*age cubed | 1.00 | 1.00 | – | 1.00 | 1.00 | 1.00 | – | 1.00 |
| 18,878.51 | 18,810.61 | PM2.5 (per 10 µg/m3) | 1.08 | 0.92 | – | 1.27 | 1.10 | 0.93 | – | 1.30 |
|  |  | Smoking pack-years | 0.75 | 0.32 | – | 1.74 | 0.77 | 0.33 | – | 1.80 |
|  |  | Pack-years*age | 1.02 | 0.98 | – | 1.05 | 1.02 | 0.98 | – | 1.05 |
|  |  | Pack-years*age squared | 1.00 | 1.00 | – | 1.00 | 1.00 | 1.00 | – | 1.00 |
|  |  | Pack-years*age cubed | 1.00 | 1.00 | – | 1.00 | 1.00 | 1.00 | – | 1.00 |
| aStratified by time period and age in months (in absence of age interaction), and adjusted for geographic region; also adjusted for age in months (in presence of age interaction) | | | | | | | | | | |
| bStratified by time period and age in months (in absence of age interaction), and adjusted for geographic region, body mass index, alcohol consumption, physical activity, overall diet quality, census tract median house value, census tract median income, and secondhand smoke exposure at home, at work, and during childhood; also adjusted for age in months (in presence of age interaction) | | | | | | | | | | |
| AIC: Akaike information criterion; CI: confidence interval; HR: hazard ratio; PM2.5: particulate matter < 2.5 µm in aerodynamic diameter | | | | | | | | | | |

Table 3. Model fit and associations between fine particulate matter and smoking characteristics with lung cancer incidence in the Nurses’ Health Study, adjusted for age, time period, and geographic region only (minimally adjusted models) or additional covariates (fully adjusted models), with various classifications of smoking based on average packs.

|  |  |  | **Minimally adjusteda** | | | | **Fully adjustedb** | | | |
| --- | --- | --- | --- | --- | --- | --- | --- | --- | --- | --- |
| **AIC, minimally adj.** | **AIC, fully adj.** | **Covariate** | **HR** | **95% CI** | | | **HR** | **95% CI** | | |
| 21,796.11 | 21,096.64 | PM2.5 (per 10 µg/m3) | 1.02 | 0.87 | – | 1.21 | 1.07 | 0.90 | – | 1.26 |
| 19,734.78 | 19,610.10 | PM2.5 (per 10 µg/m3) | 1.06 | 0.90 | – | 1.24 | 1.06 | 0.90 | – | 1.25 |
|  |  | Current v. never smoker | 25.91 | 21.96 | – | 30.57 | 19.25 | 16.18 | – | 22.91 |
|  |  | Former v. never smoker | 6.45 | 5.50 | – | 7.55 | 5.80 | 4.93 | – | 6.82 |
| 18,872.12 | 18,859.40 | PM2.5 (per 10 µg/m3) | 1.02 | 0.86 | – | 1.20 | 1.02 | 0.87 | – | 1.21 |
|  |  | Current v. never smoker | 0.74 | 0.54 | – | 1.01 | 0.70 | 0.51 | – | 0.97 |
|  |  | Former v. never smoker | 0.68 | 0.53 | – | 0.88 | 0.68 | 0.52 | – | 0.87 |
|  |  | Smoking average packs | 2.74 | 2.08 | – | 3.60 | 2.75 | 2.08 | – | 3.63 |
|  |  | Smoking duration (years) | 1.07 | 1.07 | – | 1.08 | 1.07 | 1.06 | – | 1.07 |
| 18,870.31 | 18,858.02 | PM2.5 (per 10 µg/m3) | 1.01 | 0.86 | – | 1.19 | 1.02 | 0.87 | – | 1.20 |
|  |  | Current v. never smoker | 1.09 | 0.66 | – | 1.77 | 1.01 | 0.62 | – | 1.66 |
|  |  | Former v. never smoker | 1.03 | 0.64 | – | 1.67 | 1.00 | 0.61 | – | 1.62 |
|  |  | Smoking average packs | 2.81 | 2.14 | – | 3.70 | 2.82 | 2.14 | – | 3.73 |
|  |  | Smoking duration (years) | 1.06 | 1.05 | – | 1.07 | 1.06 | 1.05 | – | 1.07 |
|  |  | Smoking cessation (months) | 1.00 | 1.00 | – | 1.00 | 1.00 | 1.00 | – | 1.00 |
| 18,866.94 | 18,854.06 | PM2.5 (per 10 µg/m3) | 1.01 | 0.86 | – | 1.20 | 1.02 | 0.87 | – | 1.20 |
|  |  | Smoking average packs | 2.89 | 2.22 | – | 3.76 | 2.84 | 2.17 | – | 3.71 |
|  |  | Smoking duration (years) | 1.06 | 1.06 | – | 1.07 | 1.06 | 1.06 | – | 1.06 |
|  |  | Smoking cessation (months) | 1.00 | 1.00 | – | 1.00 | 1.00 | 1.00 | – | 1.00 |
| 18,868.59 | 18,855.84 | PM2.5 (per 10 µg/m3) | 1.02 | 0.86 | – | 1.20 | 1.02 | 0.87 | – | 1.20 |
|  |  | Smoking average packs | 1.57 | 0.21 | – | 11.83 | 1.74 | 0.22 | – | 13.53 |
|  |  | Smoking duration (years) | 1.06 | 1.06 | – | 1.07 | 1.06 | 1.06 | – | 1.06 |
|  |  | Smoking cessation (months) | 1.00 | 1.00 | – | 1.00 | 1.00 | 1.00 | – | 1.00 |
|  |  | Ave. packs*age | 1.01 | 0.98 | – | 1.04 | 1.01 | 0.98 | – | 1.04 |
| 18,869.28 | 18,856.40 | PM2.5 (per 10 µg/m3) | 1.02 | 0.86 | – | 1.20 | 1.02 | 0.87 | – | 1.21 |
|  |  | Smoking average packs | 25.51 | 0.15 | – | 4427 | 32.35 | 0.18 | – | 5710 |
|  |  | Smoking duration (years) | 1.06 | 1.06 | – | 1.07 | 1.06 | 1.06 | – | 1.06 |
|  |  | Smoking cessation (months) | 1.00 | 1.00 | – | 1.00 | 1.00 | 1.00 | – | 1.00 |
|  |  | Ave. packs*age | 0.93 | 0.80 | – | 1.08 | 0.92 | 0.79 | – | 1.07 |
|  |  | Ave. packs*age squared | 1.00 | 1.00 | – | 1.00 | 1.00 | 1.00 | – | 1.00 |
| 18,870.50 | 18,857.65 | PM2.5 (per 10 µg/m3) | 1.02 | 0.86 | – | 1.20 | 1.02 | 0.87 | – | 1.21 |
|  |  | Smoking average packs | 4.99 | 0.01 | – | 3670 | 6.21 | 0.01 | – | 4969 |
|  |  | Smoking duration (years) | 1.06 | 1.06 | – | 1.07 | 1.06 | 1.06 | – | 1.06 |
|  |  | Smoking cessation (months) | 1.00 | 1.00 | – | 1.00 | 1.00 | 1.00 | – | 1.00 |
|  |  | Ave. packs*age | 0.90 | 0.77 | – | 1.06 | 0.90 | 0.76 | – | 1.05 |
|  |  | Ave. packs*age squared | 1.00 | 1.00 | – | 1.01 | 1.00 | 1.00 | – | 1.01 |
|  |  | Ave. packs*age cubed | 1.00 | 1.00 | – | 1.00 | 1.00 | 1.00 | – | 1.00 |
| aStratified by time period and age in months (in absence of age interaction), and adjusted for geographic region; also adjusted for age in months (in presence of age interaction) | | | | | | | | | | |
| bStratified by time period and age in months (in absence of age interaction), and adjusted for geographic region, body mass index, alcohol consumption, physical activity, overall diet quality, census tract median house value, census tract median income, and secondhand smoke exposure at home, at work, and during childhood; also adjusted for age in months (in presence of age interaction) | | | | | | | | | | |
| AIC: Akaike information criterion; CI: confidence interval; HR: hazard ratio; PM2.5: particulate matter < 2.5 µm in aerodynamic diameter | | | | | | | | | | |

Table 4. Stratified associations between fine particulate matter and smoking characteristics with lung cancer incidence in the Nurses’ Health Study, adjusted for age, time period, and geographic region only (minimally adjusted models) or additional covariates (fully adjusted models), with various classifications of smoking based on cumulative pack-years or average packs, stratified by smoking status during follow-up, 1994–2010.

|  |  | **Minimally adjusteda** | | | | **Fully adjustedb** | | | |
| --- | --- | --- | --- | --- | --- | --- | --- | --- | --- |
| **Stratum** | **Covariate** | **HR** | **95% CI** | | | **HR** | **95% CI** | | |
| Never smokers | PM2.5 (per 10 µg/m3) | 1.24 | 0.74 | – | 2.06 | 1.27 | 0.76 | – | 2.12 |
| Former smokers | PM2.5 (per 10 µg/m3) | 1.35 | 1.00 | – | 1.81 | 1.35 | 1.00 | – | 1.82 |
|  | Smoking pack-years | 1.08 | 1.04 | – | 1.13 | 1.09 | 1.04 | – | 1.13 |
|  | Smoking duration (years) | 1.02 | 1.01 | – | 1.04 | 1.02 | 1.00 | – | 1.04 |
|  | Smoking cessation (months) | 1.00 | 1.00 | – | 1.00 | 1.00 | 1.00 | – | 1.00 |
|  | Pack-years*age | 1.00 | 1.00 | – | 1.00 | 1.00 | 1.00 | – | 1.00 |
|  | PM2.5 (per 10 µg/m3) | 1.27 | 0.95 | – | 1.71 | 1.27 | 0.95 | – | 1.71 |
|  | Smoking average packs | 1.85 | 1.25 | – | 2.74 | 1.92 | 1.29 | – | 2.85 |
|  | Smoking duration (years) | 1.07 | 1.05 | – | 1.08 | 1.06 | 1.04 | – | 1.08 |
|  | Smoking cessation (months) | 1.00 | 1.00 | – | 1.00 | 1.00 | 1.00 | – | 1.00 |
| Current or recent former smokers | PM2.5 (per 10 µg/m3) | 0.92 | 0.74 | – | 1.15 | 0.94 | 0.75 | – | 1.17 |
| Smoking pack-years | 1.07 | 1.05 | – | 1.10 | 1.07 | 1.04 | – | 1.10 |
|  | Smoking duration (years) | 1.03 | 1.02 | – | 1.05 | 1.03 | 1.02 | – | 1.05 |
|  | Smoking cessation (months) | 1.00 | 1.00 | – | 1.00 | 1.00 | 1.00 | – | 1.00 |
|  | Pack-years*age | 1.00 | 1.00 | – | 1.00 | 1.00 | 1.00 | – | 1.00 |
|  | PM2.5 (per 10 µg/m3) | 0.90 | 0.73 | – | 1.12 | 0.92 | 0.74 | – | 1.14 |
|  | Smoking average packs | 43.01 | 24.37 | – | 75.92 | 42.72 | 24.01 | – | 75.99 |
|  | Smoking duration (years) | 1.09 | 1.08 | – | 1.11 | 1.09 | 1.07 | – | 1.11 |
|  | Smoking cessation (months) | 1.00 | 1.00 | – | 1.00 | 1.00 | 1.00 | – | 1.00 |
| aStratified by time period and age in months (in absence of age interaction), and adjusted for geographic region; also adjusted for age in months (in presence of age interaction) | | | | | | | | | |
| bStratified by time period and age in months (in absence of age interaction), and adjusted for geographic region, body mass index, alcohol consumption, physical activity, overall diet quality, census tract median house value, census tract median income, and secondhand smoke exposure at home, at work, and during childhood; also adjusted for age in months (in presence of age interaction) | | | | | | | | | |
| AIC: Akaike information criterion; CI: confidence interval; HR: hazard ratio; PM2.5: particulate matter < 2.5 µm in aerodynamic diameter | | | | | | | | | |
